# Supplementary material
Source: PubMed Central journal article supplement (PMC4054243)
Supplement: CVI.00035-14_zcd999095008so1.pdf [file CVI.00035-14_zcd999095008so1.pdf]

## A. A10L

+ Majority

Majority

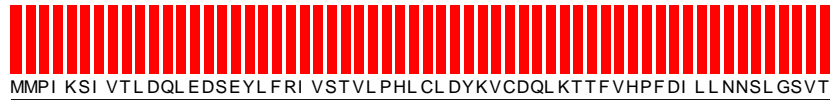

|                    |                                                                                                                  |    |
|--------------------|------------------------------------------------------------------------------------------------------------------|----|
|                    | MMPI KSI VTL DQL EDSEYLFRI VSTVL PHLCLDYKVC DQLKTT FVHPFDI LLNNSLGSVT                                            |    |
|                    | 10                    20                    30                    40                    50                    60 |    |
| ACAM2000_A10L.pro  | MMPI KSI VTL DQL EDSEYLFRI VSTVL PHLCLDYKVC DQLKTT FVHPFDI LLNNSLGSVT                                            | 60 |
| DFF9_A10L.pro      | MMPI KSI VTL DQL EDSEYLFRI VSTVL PHLCLDYKVC DQLKTT FVHPFDI LLNNSLGSVT                                            | 60 |
| DFF10_A10L.pro     | MMPI KSI VTL DQL EDSEYLFRI VSTVL PHLCLDYKVC DQLKTT FVHPFDI LLNNSLGSVT                                            | 60 |
| DFF11_A10L.pro     | MMPI KSI VTL DQL EDSEYLFRI VSTVL PHLCLDYKVC DQLKTT FVHPFDI LLNNSLGSVT                                            | 60 |
| DFF12_A10L.pro     | MMPI KSI VTL DQL EDSEYLFRI VSTVL PHLCLDYKVC DQLKTT FVHPFDI LLNNSLGSVT                                            | 60 |
| DFF13_A10L.pro     | MMPI KSI VTL DQL EDSEYLFRI VSTVL PHLCLDYKVC DQLKTT FVHPFDI LLNNSLGSVT                                            | 60 |
| DFF15_A10L.pro     | MMPI KSI VTL DQL EDSEYLFRI VSTVL PHLCLDYKVC DQLKTT FVHPFDI LLNNSLGSVT                                            | 60 |
| DFF16_A10L.pro     | MMPI KSI VTL DQL EDSEYLFRI VSTVL PHLCLDYKVC DQLKTT FVHPFDI LLNNSLGSVT                                            | 60 |
| DFF17_A10L.pro     | MMPI KSI VTL DQL EDSEYLFRI VSTVL PHLCLDYKVC DQLKTT FVHPFDI LLNNSLGSVT                                            | 60 |
| DFF19_A10L.pro     | MMPI KSI VTL DQL EDSEYLFRI VSTVL PHLCLDYKVC DQLKTT FVHPFDI LLNNSLGSVT                                            | 60 |
| DFF20_A10L.pro     | MMPI KSI VTL DQL EDSEYLFRI VSTVL PHLCLDYKVC DQLKTT FVHPFDI LLNNSLGSVT                                            | 60 |
| DFF21_A10L.pro     | MMPI KSI VTL DQL EDSEYLFRI VSTVL PHLCLDYKVC DQLKTT FVHPFDI LLNNSLGSVT                                            | 60 |
| CL3_A10L.pro       | MMPI KSI VTL DQL EDSEYLFRI VSTVL PHLCLDYKVC DQLKTT FVHPFDI LLNNSLGSVT                                            | 60 |
| VACV-3737_A10L.pro | MMPI KSI VTL DQL EDSEYLFRI VSTVL PHLCLDYKVC DQLKTT FVHPFDI LLNNSLGSVT                                            | 60 |
| VACV-DUKE_A10L.pro | MMPI KSI VTL DQL EDSEYLFRI VSTVL PHLCLDYKVC DQLKTT FVHPFDI LLNNSLGSVT                                            | 60 |

+ Majority

Majority

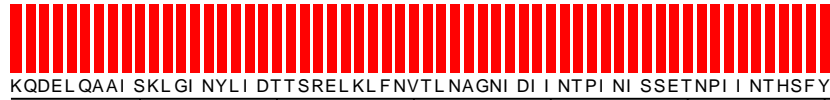

|                    |                                                                                                                     |     |
|--------------------|---------------------------------------------------------------------------------------------------------------------|-----|
|                    | KQDELQAAI SKLGI NYLI DTT SRELKLFNVT LNAGNI DI I NTPI NI SSETNPI I NTHSFY                                            |     |
|                    | 70                    80                    90                    100                    110                    120 |     |
| ACAM2000_A10L.pro  | KQDELQAAI SKLGI NYLI DTT SRELKLFNVT LNAGNI DI I NTPI NI SSETNPI I NTHSFY                                            | 120 |
| DFF9_A10L.pro      | KQDELQAAI SKLGI NYLI DTT SRELKLFNVT LNAGNI DI I NTPI NI SSETNPI I NTHSFY                                            | 120 |
| DFF10_A10L.pro     | KQDELQAAI SKLGI NYLI DTT SRELKLFNVT LNAGNI DI I NTPI NI SSETNPI I NTHSFY                                            | 120 |
| DFF11_A10L.pro     | KQDELQAAI SKLGI NYLI DTT SRELKLFNVT LNAGNI DI I NTPI NI SSETNPI I NTHSFY                                            | 120 |
| DFF12_A10L.pro     | KQDELQAAI SKLGI NYLI DTT SRELKLFNVT LNAGNI DI I NTPI NI SSETNPI I NTHSFY                                            | 120 |
| DFF13_A10L.pro     | KQDELQAAI SKLGI NYLI DTT SRELKLFNVT LNAGNI DI I NTPI NI SSETNPI I NTHSFY                                            | 120 |
| DFF15_A10L.pro     | KQDELQAAI SKLGI NYLI DTT SRELKLFNVT LNAGNI DI I NTPI NI SSETNPI I NTHSFY                                            | 120 |
| DFF16_A10L.pro     | KQDELQAAI SKLGI NYLI DTT SRELKLFNVT LNAGNI DI I NTPI NI SSETNPI I NTHSFY                                            | 120 |
| DFF17_A10L.pro     | KQDELQAAI SKLGI NYLI DTT SRELKLFNVT LNAGNI DI I NTPI NI SSETNPI I NTHSFY                                            | 120 |
| DFF19_A10L.pro     | KQDELQAAI SKLGI NYLI DTT SRELKLFNVT LNAGNI DI I NTPI NI SSETNPI I NTHSFY                                            | 120 |
| DFF20_A10L.pro     | KQDELQAAI SKLGI NYLI DTT SRELKLFNVT LNAGNI DI I NTPI NI SSETNPI I NTHSFY                                            | 120 |
| DFF21_A10L.pro     | KQDELQAAI SKLGI NYLI DTT SRELKLFNVT LNAGNI DI I NTPI NI SSETNPI I NTHSFY                                            | 120 |
| CL3_A10L.pro       | KQDELQAAI SKLGI NYLI DTT SRELKLFNVT LNAGNI DI I NTPI NI SSETNPI I NTHSFY                                            | 120 |
| VACV-3737_A10L.pro | KQDELQAAI SKLGI NYLI DTT SRELKLFNVT LNAGNI DI I NTPI NI SSETNPI I NTHSFY                                            | 120 |
| VACV-DUKE_A10L.pro | KQDELQAAI SKLGI NYLI DTT SRELKLFNVT LNAGNI DI I NTPI NI SSETNPI I NTHSFY                                            | 120 |

+ Majority

Majority

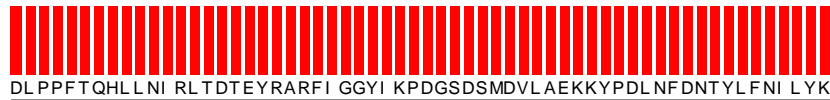

|                    |                                                                                                                        |     |
|--------------------|------------------------------------------------------------------------------------------------------------------------|-----|
|                    | DLPPFTQHLLNI RLTDTEYRARFI GGYI KPDGSDSMDVLA EKKYPDLNFDNTYLFNI LYK                                                      |     |
|                    | 130                    140                    150                    160                    170                    180 |     |
| ACAM2000_A10L.pro  | DLPPFTQHLLNI RLTDTEYRARFI GGYI KPDGSDSMDVLA EKKYPDLNFDNTYLFNI LYK                                                      | 180 |
| DFF9_A10L.pro      | DLPPFTQHLLNI RLTDTEYRARFI GGYI KPDGSDSMDVLA EKKYPDLNFDNTYLFNI LYK                                                      | 180 |
| DFF10_A10L.pro     | DLPPFTQHLLNI RLTDTEYRARFI GGYI KPDGSDSMDVLA EKKYPDLNFDNTYLFNI LYK                                                      | 180 |
| DFF11_A10L.pro     | DLPPFTQHLLNI RLTDTEYRARFI GGYI KPDGSDSMDVLA EKKYPDLNFDNTYLFNI LYK                                                      | 180 |
| DFF12_A10L.pro     | DLPPFTQHLLNI RLTDTEYRARFI GGYI KPDGSDSMDVLA EKKYPDLNFDNTYLFNI LYK                                                      | 180 |
| DFF13_A10L.pro     | DLPPFTQHLLNI RLTDTEYRARFI GGYI KPDGSDSMDVLA EKKYPDLNFDNTYLFNI LYK                                                      | 180 |
| DFF15_A10L.pro     | DLPPFTQHLLNI RLTDTEYRARFI GGYI KPDGSDSMDVLA EKKYPDLNFDNTYLFNI LYK                                                      | 180 |
| DFF16_A10L.pro     | DLPPFTQHLLNI RLTDTEYRARFI GGYI KPDGSDSMDVLA EKKYPDLNFDNTYLFNI LYK                                                      | 180 |
| DFF17_A10L.pro     | DLPPFTQHLLNI RLTDTEYRARFI GGYI KPDGSDSMDVLA EKKYPDLNFDNTYLFNI LYK                                                      | 180 |
| DFF19_A10L.pro     | DLPPFTQHLLNI RLTDTEYRARFI GGYI KPDGSDSMDVLA EKKYPDLNFDNTYLFNI LYK                                                      | 180 |
| DFF20_A10L.pro     | DLPPFTQHLLNI RLTDTEYRARFI GGYI KPDGSDSMDVLA EKKYPDLNFDNTYLFNI LYK                                                      | 180 |
| DFF21_A10L.pro     | DLPPFTQHLLNI RLTDTEYRARFI GGYI KPDGSDSMDVLA EKKYPDLNFDNTYLFNI LYK                                                      | 180 |
| CL3_A10L.pro       | DLPPFTQHLLNI RLTDTEYRARFI GGYI KPDGSDSMDVLA EKKYPDLNFDNTYLFNI LYK                                                      | 180 |
| VACV-3737_A10L.pro | DLPPFTQHLLNI RLTDTEYRARFI GGYI KPDGSDSMDVLA EKKYPDLNFDNTYLFNI LYK                                                      | 180 |
| VACV-DUKE_A10L.pro | DLPPFTQHLLNI RLTDTEYRARFI GGYI KPDGSDSMDVLA EKKYPDLNFDNTYLFNI LYK                                                      | 180 |



+ Majority

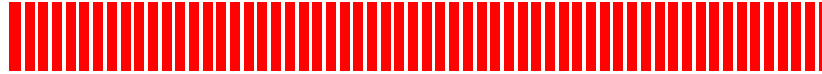

Majority

RSTAI KVTKSMFWDGMDYEEYKSKNLQDMMFI NSTCYVFLYHNHNNTTYCSI LSDI I SAE  
 370 380 390 400 410 420

ACAM2000\_A10L.pro RSTAI KVTKSMFWDGMDYEEYKSKNLQDMMFI NSTCYVFLYHNHNNTTYCSI LSDI I SAE 420  
 DPP9\_A10L.pro RSTAI KVTKSMFWDGMDYEEYKSKNLQDMMFI NSTCYVFLYHNHNNTTYCSI LSDI I SAE 420  
 DPP10\_A10L.pro RSTAI KVTKSMFWDGMDYEEYKSKNLQDMMFI NSTCYVFLYHNHNNTTYCSI LSDI I SAE 420  
 DPP11\_A10L.pro RSTAI KVTKSMFWDGMDYEEYKSKNLQDMMFI NSTCYVFLYHNHNNTTYCSI LSDI I SAE 420  
 DPP12\_A10L.pro RSTAI KVTKSMFWDGMDYEEYKSKNLQDMMFI NSTCYVFLYHNHNNTTYCSI LSDI I SAE 420  
 DPP13\_A10L.pro RSTAI KVTKSMFWDGMDYEEYKSKNLQDMMFI NSTCYVFLYHNHNNTTYCSI LSDI I SAE 420  
 DPP15\_A10L.pro RSTAI KVTKSMFWDGMDYEEYKSKNLQDMMFI NSTCYVFLYHNHNNTTYCSI LSDI I SAE 420  
 DPP16\_A10L.pro RSTAI KVTKSMFWDGMDYEEYKSKNLQDMMFI NSTCYVFLYHNHNNTTYCSI LSDI I SAE 420  
 DPP17\_A10L.pro RSTAI KVTKSMFWDGMDYEEYKSKNLQDMMFI NSTCYVFLYHNHNNTTYCSI LSDI I SAE 420  
 DPP19\_A10L.pro RSTAI KVTKSMFWDGMDYEEYKSKNLQDMMFI NSTCYVFLYHNHNNTTYCSI LSDI I SAE 420  
 DPP20\_A10L.pro RSTAI KVTKSMFWDGMDYEEYKSKNLQDMMFI NSTCYVFLYHNHNNTTYCSI LSDI I SAE 420  
 DPP21\_A10L.pro RSTAI KVTKSMFWDGMDYEEYKSKNLQDMMFI NSTCYVFLYHNHNNTTYCSI LSDI I SAE 420  
 CL3\_A10L.pro RSTAI KVTKSMFWDGMDYEEYKSKNLQDMMFI NSTCYVFLYHNHNNTTYCSI LSDI I SAE 420  
 VACV-3737\_A10L.pro RSTAI KVTKSMFWDGMDYEEYKSKNLQDMMFI NSTCYVFLYHNHNNTTYCSI LSDI I SAE 420  
 VACV-DUKE\_A10L.pro RSTAI KVTKSMFWDGMDYEEYKSKNLQDMMFI NSTCYVFLYHNHNNTTYCSI LSDI I SAE 420

+ Majority

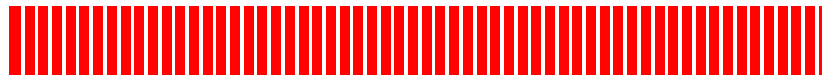

Majority

KTPI RVCLLPRVVGKTVTNL I SETLKSI SSMTI REFPRKDKSI MHI GLSETGFMRFQQL  
 430 440 450 460 470 480

ACAM2000\_A10L.pro KTPI RVCLLPRVVGKTVTNL I SETLKSI SSMTI REFPRKDKSI MHI GLSETGFMRFQQL 480  
 DPP9\_A10L.pro KTPI RVCLLPRVVGKTVTNL I SETLKSI SSMTI REFPRKDKSI MHI GLSETGFMRFQQL 480  
 DPP10\_A10L.pro KTPI RVCLLPRVVGKTVTNL I SETLKSI SSMTI REFPRKDKSI MHI GLSETGFMRFQQL 480  
 DPP11\_A10L.pro KTPI RVCLLPRVVGKTVTNL I SETLKSI SSMTI REFPRKDKSI MHI GLSETGFMRFQQL 480  
 DPP12\_A10L.pro KTPI RVCLLPRVVGKTVTNL I SETLKSI SSMTI REFPRKDKSI MHI GLSETGFMRFQQL 480  
 DPP13\_A10L.pro KTPI RVCLLPRVVGKTVTNL I SETLKSI SSMTI REFPRKDKSI MHI GLSETGFMRFQQL 480  
 DPP15\_A10L.pro KTPI RVCLLPRVVGKTVTNL I SETLKSI SSMTI REFPRKDKSI MHI GLSETGFMRFQQL 480  
 DPP16\_A10L.pro KTPI RVCLLPRVVGKTVTNL I SETLKSI SSMTI REFPRKDKSI MHI GLSETGFMRFQQL 480  
 DPP17\_A10L.pro KTPI RVCLLPRVVGKTVTNL I SETLKSI SSMTI REFPRKDKSI MHI GLSETGFMRFQQL 480  
 DPP19\_A10L.pro KTPI RVCLLPRVVGKTVTNL I SETLKSI SSMTI REFPRKDKSI MHI GLSETGFMRFQQL 480  
 DPP20\_A10L.pro KTPI RVCLLPRVVGKTVTNL I SETLKSI SSMTI REFPRKDKSI MHI GLSETGFMRFQQL 480  
 DPP21\_A10L.pro KTPI RVCLLPRVVGKTVTNL I SETLKSI SSMTI REFPRKDKSI MHI GLSETGFMRFQQL 480  
 CL3\_A10L.pro KTPI RVCLLPRVVGKTVTNL I SETLKSI SSMTI REFPRKDKSI MHI GLSETGFMRFQQL 480  
 VACV-3737\_A10L.pro KTPI RVCLLPRVVGKTVTNL I SETLKSI SSMTI REFPRKDKSI MHI GLSETGFMRFQQL 480  
 VACV-DUKE\_A10L.pro KTPI RVCLLPRVVGKTVTNL I SETLKSI SSMTI REFPRKDKSI MHI GLSETGFMRFQQL 480

+ Majority

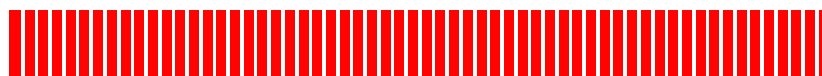

Majority

LRLMADKPHETA I KEVVMAYVGI KLGDKGSPYYI RKESYQDFI YLLFASMGFKVTTRRSI  
 490 500 510 520 530 540

ACAM2000\_A10L.pro LRLMADKPHETA I KEVVMAYVGI KLGDKGSPYYI RKESYQDFI YLLFASMGFKVTTRRSI 540  
 DPP9\_A10L.pro LRLMADKPHETA I KEVVMAYVGI KLGDKGSPYYI RKESYQDFI YLLFASMGFKVTTRRSI 540  
 DPP10\_A10L.pro LRLMADKPHETA I KEVVMAYVGI KLGDKGSPYYI RKESYQDFI YLLFASMGFKVTTRRSI 540  
 DPP11\_A10L.pro LRLMADKPHETA I KEVVMAYVGI KLGDKGSPYYI RKESYQDFI YLLFASMGFKVTTRRSI 540  
 DPP12\_A10L.pro LRLMADKPHETA I KEVVMAYVGI KLGDKGSPYYI RKESYQDFI YLLFASMGFKVTTRRSI 540  
 DPP13\_A10L.pro LRLMADKPHETA I KEVVMAYVGI KLGDKGSPYYI RKESYQDFI YLLFASMGFKVTTRRSI 540  
 DPP15\_A10L.pro LRLMADKPHETA I KEVVMAYVGI KLGDKGSPYYI RKESYQDFI YLLFASMGFKVTTRRSI 540  
 DPP16\_A10L.pro LRLMADKPHETA I KEVVMAYVGI KLGDKGSPYYI RKESYQDFI YLLFASMGFKVTTRRSI 540  
 DPP17\_A10L.pro LRLMADKPHETA I KEVVMAYVGI KLGDKGSPYYI RKESYQDFI YLLFASMGFKVTTRRSI 540  
 DPP19\_A10L.pro LRLMADKPHETA I KEVVMAYVGI KLGDKGSPYYI RKESYQDFI YLLFASMGFKVTTRRSI 540  
 DPP20\_A10L.pro LRLMADKPHETA I KEVVMAYVGI KLGDKGSPYYI RKESYQDFI YLLFASMGFKVTTRRSI 540  
 DPP21\_A10L.pro LRLMADKPHETA I KEVVMAYVGI KLGDKGSPYYI RKESYQDFI YLLFASMGFKVTTRRSI 540  
 CL3\_A10L.pro LRLMADKPHETA I KEVVMAYVGI KLGDKGSPYYI RKESYQDFI YLLFASMGFKVTTRRSI 540  
 VACV-3737\_A10L.pro LRLMADKPHETA I KEVVMAYVGI KLGDKGSPYYI RKESYQDFI YLLFASMGFKVTTRRSI 540  
 VACV-DUKE\_A10L.pro LRLMADKPHETA I KEVVMAYVGI KLGDKGSPYYI RKESYQDFI YLLFASMGFKVTTRRSI 540

+ Majority

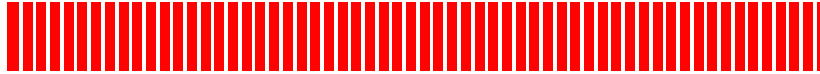

Majority

MGSNNI SI I SI RPRVTKQYI VTTL MKTSCSKNEAEKLI TSAFDLLNFMVSVSDFRDYQSY  
 550 560 570 580 590 600

|                    |                                                                     |     |
|--------------------|---------------------------------------------------------------------|-----|
| ACAM2000_A10L.pro  | MGSNNI SI I SI RPRVTKQYI VTTL MKTSCSKNEAEKLI TSAFDLLNFMVSVSDFRDYQSY | 600 |
| DPP9_A10L.pro      | MGSNNI SI I SI RPRVTKQYI VTTL MKTSCSKNEAEKLI TSAFDLLNFMVSVSDFRDYQSY | 600 |
| DPP10_A10L.pro     | MGSNNI SI I SI RPRVTKQYI VTTL MKTSCSKNEAEKLI TSAFDLLNFMVSVSDFRDYQSY | 600 |
| DPP11_A10L.pro     | MGSNNI SI I SI RPRVTKQYI VTTL MKTSCSKNEAEKLI TSAFDLLNFMVSVSDFRDYQSY | 600 |
| DPP12_A10L.pro     | MGSNNI SI I SI RPRVTKQYI VTTL MKTSCSKNEAEKLI TSAFDLLNFMVSVSDFRDYQSY | 600 |
| DPP13_A10L.pro     | MGSNNI SI I SI RPRVTKQYI VTTL MKTSCSKNEAEKLI TSAFDLLNFMVSVSDFRDYQSY | 600 |
| DPP15_A10L.pro     | MGSNNI SI I SI RPRVTKQYI VTTL MKTSCSKNEAEKLI TSAFDLLNFMVSVSDFRDYQSY | 600 |
| DPP16_A10L.pro     | MGSNNI SI I SI RPRVTKQYI VTTL MKTSCSKNEAEKLI TSAFDLLNFMVSVSDFRDYQSY | 600 |
| DPP17_A10L.pro     | MGSNNI SI I SI RPRVTKQYI VTTL MKTSCSKNEAEKLI TSAFDLLNFMVSVSDFRDYQSY | 600 |
| DPP19_A10L.pro     | MGSNNI SI I SI RPRVTKQYI VTTL MKTSCSKNEAEKLI TSAFDLLNFMVSVSDFRDYQSY | 600 |
| DPP20_A10L.pro     | MGSNNI SI I SI RPRVTKQYI VTTL MKTSCSKNEAEKLI TSAFDLLNFMVSVSDFRDYQSY | 600 |
| DPP21_A10L.pro     | MGSNNI SI I SI RPRVTKQYI VTTL MKTSCSKNEAEKLI TSAFDLLNFMVSVSDFRDYQSY | 600 |
| CL3_A10L.pro       | MGSNNI SI I SI RPRVTKQYI VTTL MKTSCSKNEAEKLI TSAFDLLNFMVSVSDFRDYQSY | 600 |
| VACV-3737_A10L.pro | MGSNNI SI I SI RPRVTKQYI VTTL MKTSCSKNEAEKLI TSAFDLLNFMVSVSDFRDYQSY | 600 |
| VACV-DUKE_A10L.pro | MGSNNI SI I SI RPRVTKQYI VTTL MKTSCSKNEAEKLI TSAFDLLNFMVSVSDFRDYQSY | 600 |

+ Majority

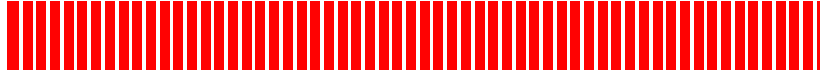

Majority

RQYRNYCPRYFYAGSPEGEETI I CDSEPI SI LDRI DTRGI FSAYTI NEMMDTDI FSPENK  
 610 620 630 640 650 660

|                    |                                                                      |     |
|--------------------|----------------------------------------------------------------------|-----|
| ACAM2000_A10L.pro  | RQYRNYCPRYFYAGSPEGEETI I CDSEPI SI LDRI DTRGI FSAYTI NEMMDTDI FSPENK | 660 |
| DPP9_A10L.pro      | RQYRNYCPRYFYAGSPEGEETI I CDSEPI SI LDRI DTRGI FSAYTI NEMMDTDI FSPENK | 660 |
| DPP10_A10L.pro     | RQYRNYCPRYFYAGSPEGEETI I CDSEPI SI LDRI DTRGI FSAYTI NEMMDTDI FSPENK | 660 |
| DPP11_A10L.pro     | RQYRNYCPRYFYAGSPEGEETI I CDSEPI SI LDRI DTRGI FSAYTI NEMMDTDI FSPENK | 660 |
| DPP12_A10L.pro     | RQYRNYCPRYFYAGSPEGEETI I CDSEPI SI LDRI DTRGI FSAYTI NEMMDTDI FSPENK | 660 |
| DPP13_A10L.pro     | RQYRNYCPRYFYAGSPEGEETI I CDSEPI SI LDRI DTRGI FSAYTI NEMMDTDI FSPENK | 660 |
| DPP15_A10L.pro     | RQYRNYCPRYFYAGSPEGEETI I CDSEPI SI LDRI DTRGI FSAYTI NEMMDTDI FSPENK | 660 |
| DPP16_A10L.pro     | RQYRNYCPRYFYAGSPEGEETI I CDSEPI SI LDRI DTRGI FSAYTI NEMMDTDI FSPENK | 660 |
| DPP17_A10L.pro     | RQYRNYCPRYFYAGSPEGEETI I CDSEPI SI LDRI DTRGI FSAYTI NEMMDTDI FSPENK | 660 |
| DPP19_A10L.pro     | RQYRNYCPRYFYAGSPEGEETI I CDSEPI SI LDRI DTRGI FSAYTI NEMMDTDI FSPENK | 660 |
| DPP20_A10L.pro     | RQYRNYCPRYFYAGSPEGEETI I CDSEPI SI LDRI DTRGI FSAYTI NEMMDTDI FSPENK | 660 |
| DPP21_A10L.pro     | RQYRNYCPRYFYAGSPEGEETI I CDSEPI SI LDRI DTRGI FSAYTI NEMMDTDI FSPENK | 660 |
| CL3_A10L.pro       | RQYRNYCPRYFYAGSPEGEETI I CDSEPI SI LDRI DTRGI FSAYTI NEMMDTDI FSPENK | 660 |
| VACV-3737_A10L.pro | RQYRNYCPRYFYAGSPEGEETI I CDSEPI SI LDRI DTRGI FSAYTI NEMMDTDI FSPENK | 660 |
| VACV-DUKE_A10L.pro | RQYRNYCPRYFYAGSPEGEETI I CDSEPI SI LDRI DTRGI FSAYTI NEMMDTDI FSPENK | 660 |

+ Majority

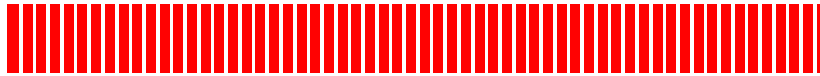

Majority

AFKNNL SRFI ESGDI TGEDI FCAMPYNI LDRI I TNAGTCTVSI GDMLDNI TTQSDCNMTN  
 670 680 690 700 710 720

|                    |                                                                       |     |
|--------------------|-----------------------------------------------------------------------|-----|
| ACAM2000_A10L.pro  | AFKNNL SRFI ESGDI TGEDI FCAMPYNI LDRI I TNAGTCTVSI GDMLDNI TTQSDCNMTN | 720 |
| DPP9_A10L.pro      | AFKNNL SRFI ESGDI TGEDI FCAMPYNI LDRI I TNAGTCTVSI GDMLDNI TTQSDCNMTN | 720 |
| DPP10_A10L.pro     | AFKNNL SRFI ESGDI TGEDI FCAMPYNI LDRI I TNAGTCTVSI GDMLDNI TTQSDCNMTN | 720 |
| DPP11_A10L.pro     | AFKNNL SRFI ESGDI TGEDI FCAMPYNI LDRI I TNAGTCTVSI GDMLDNI TTQSDCNMTN | 720 |
| DPP12_A10L.pro     | AFKNNL SRFI ESGDI TGEDI FCAMPYNI LDRI I TNAGTCTVSI GDMLDNI TTQSDCNMTN | 720 |
| DPP13_A10L.pro     | AFKNNL SRFI ESGDI TGEDI FCAMPYNI LDRI I TNAGTCTVSI GDMLDNI TTQSDCNMTN | 720 |
| DPP15_A10L.pro     | AFKNNL SRFI ESGDI TGEDI FCAMPYNI LDRI I TNAGTCTVSI GDMLDNI TTQSDCNMTN | 720 |
| DPP16_A10L.pro     | AFKNNL SRFI ESGDI TGEDI FCAMPYNI LDRI I TNAGTCTVSI GDMLDNI TTQSDCNMTN | 720 |
| DPP17_A10L.pro     | AFKNNL SRFI ESGDI TGEDI FCAMPYNI LDRI I TNAGTCTVSI GDMLDNI TTQSDCNMTN | 720 |
| DPP19_A10L.pro     | AFKNNL SRFI ESGDI TGEDI FCAMPYNI LDRI I TNAGTCTVSI GDMLDNI TTQSDCNMTN | 720 |
| DPP20_A10L.pro     | AFKNNL SRFI ESGDI TGEDI FCAMPYNI LDRI I TNAGTCTVSI GDMLDNI TTQSDCNMTN | 720 |
| DPP21_A10L.pro     | AFKNNL SRFI ESGDI TGEDI FCAMPYNI LDRI I TNAGTCTVSI GDMLDNI TTQSDCNMTN | 720 |
| CL3_A10L.pro       | AFKNNL SRFI ESGDI TGEDI FCAMPYNI LDRI I TNAGTCTVSI GDMLDNI TTQSDCNMTN | 720 |
| VACV-3737_A10L.pro | AFKNNL SRFI ESGDI TGEDI FCAMPYNI LDRI I TNAGTCTVSI GDMLDNI TTQSDCNMTN | 720 |
| VACV-DUKE_A10L.pro | AFKNNL SRFI ESGDI TGEDI FCAMPYNI LDRI I TNAGTCTVSI GDMLDNI TTQSDCNMTN | 720 |

+ Majority

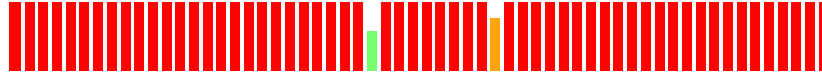

Majority

EI TDMI NASL KNTI SKDNNML VSQL DSVANRSKQTI GDL RQSSCKMALL FKNL VTSI YT  
 730 740 750 760 770 780

|                    |                                                                        |     |
|--------------------|------------------------------------------------------------------------|-----|
| ACAM2000_A10L.pro  | EI TDMI NASL KNTI SKDNNML VSQL DSVANRSKQTI GDL RQSSCKMALL FKNL VTSI YT | 780 |
| DPP9_A10L.pro      | EI TDMI NASL KNTI SKDNNML VSQL NSVANRSKQKI GDL RQSSCKMALL FKNL VTSI YT | 780 |
| DPP10_A10L.pro     | EI TDMI NASL KNTI SKDNNML VSQL DSVANRSKQTI GDL RQSSCKMALL FKNL VTSI YT | 780 |
| DPP11_A10L.pro     | EI TDMI NASL KNTI SKDNNML VSQL DSVANRSKQTI GDL RQSSCKMALL FKNL VTSI YT | 780 |
| DPP12_A10L.pro     | EI TDMI NASL KNTI SKDNNML VSQL DSVANRSKQTI GDL RQSSCKMALL FKNL VTSI YT | 780 |
| DPP13_A10L.pro     | EI TDMI NASL KNTI SKDNNML VSQL NSVANRSKQTI GDL RQSSCKMALL FKNL VTSI YT | 780 |
| DPP15_A10L.pro     | EI TDMI NASL KNTI SKDNNML VSQL DSVANRSKQTI GDL RQSSCKMALL FKNL VTSI YT | 780 |
| DPP16_A10L.pro     | EI TDMI NASL KNTI SKDNNML VSQL DSVANRSKQTI GDL RQSSCKMALL FKNL VTSI YT | 780 |
| DPP17_A10L.pro     | EI TDMI NASL KNTI SKDNNML VSQL DSVANRSKQTI GDL RQSSCKMALL FKNL VTSI YT | 780 |
| DPP19_A10L.pro     | EI TDMI NASL KNTI SKDNNML VSQL DSVANRSKQTI GDL RQSSCKMALL FKNL VTSI YT | 780 |
| DPP20_A10L.pro     | EI TDMI NASL KNTI SKDNNML VSQL DSVANRSKQTI GDL RQSSCKMALL FKNL VTSI YT | 780 |
| DPP21_A10L.pro     | EI TDMI NASL KNTI SKDNNML VSQL NSVANRSKQTI GDL RQSSCKMALL FKNL VTSI YT | 780 |
| CL3_A10L.pro       | EI TDMI NASL KNTI SKDNNML VSQL DSVANRSKQKI GDL RQSSCKMALL FKNL VTSI YT | 780 |
| VACV-3737_A10L.pro | EI TDMI NASL KNTI SKDNNML VSQL NSVANRSKQKI GDL RQSSCKMALL FKNL VTSI YT | 780 |
| VACV-DUKE_A10L.pro | EI TDMI NASL KNTI SKDNNML VSQL NSVANRSKQTI GDL RQSSCKMALL FKNL VTSI YT | 780 |

+ Majority



Majority

I ERI FNAKVGDDVKASMLEEKYKVFTDI SMSLYKDLI AMENL KAML YI I RRS GCRI DDAQI  
 790 800 810 820 830 840

|                    |                                                                         |     |
|--------------------|-------------------------------------------------------------------------|-----|
| ACAM2000_A10L.pro  | I ERI FNAKVGDDVKASMLEEKYKVFTDI SMSLYKDLI AMENL KAML YI I RRS GCRI DDAQI | 840 |
| DPP9_A10L.pro      | I ERI FNAKVGDDVKASMLEEKYKVFTDI SMSLYKDLI AMENL KAML YI I RRS GCRI DDAQI | 840 |
| DPP10_A10L.pro     | I ERI FNAKVGDDVKASMLEEKYKVFTDI SMSLYKDLI AMENL KAML YI I RRS GCRI DDAQI | 840 |
| DPP11_A10L.pro     | I ERI FNAKVGDDVKASMLEEKYKVFTDI SMSLYKDLI AMENL KAML YI I RRS GCRI DDAQI | 840 |
| DPP12_A10L.pro     | I ERI FNAKVGDDVKASMLEEKYKVFTDI SMSLYKDLI AMENL KAML YI I RRS GCRI DDAQI | 840 |
| DPP13_A10L.pro     | I ERI FNAKVGDDVKASMLEEKYKVFTDI SMSLYKDLI AMENL KAML YI I RRS GCRI DDAQI | 840 |
| DPP15_A10L.pro     | I ERI FNAKVGDDVKASMLEEKYKVFTDI SMSLYKDLI AMENL KAML YI I RRS GCRI DDAQI | 840 |
| DPP16_A10L.pro     | I ERI FNAKVGDDVKASMLEEKYKVFTDI SMSLYKDLI AMENL KAML YI I RRS GCRI DDAQI | 840 |
| DPP17_A10L.pro     | I ERI FNAKVGDDVKASMLEEKYKVFTDI SMSLYKDLI AMENL KAML YI I RRS GCRI DDAQI | 840 |
| DPP19_A10L.pro     | I ERI FNAKVGDDVKASMLEEKYKVFTDI SMSLYKDLI AMENL KAML YI I RRS GCRI DDAQI | 840 |
| DPP20_A10L.pro     | I ERI FNAKVGDDVKASMLEEKYKVFTDI SMSLYKDLI AMENL KAML YI I RRS GCRI DDAQI | 840 |
| DPP21_A10L.pro     | I ERI FNAKVGDDVKASMLEEKYKVFTDI SMSLYKDLI AMENL KAML YI I RRS GCRI DDAQI | 840 |
| CL3_A10L.pro       | I ERI FNAKVGDDVKASMLEEKYKVFTDI SMSLYKDLI AMENL KAML YI I RRS GCRI DDAQI | 840 |
| VACV-3737_A10L.pro | I ERI FNAKVGDDVKASMLEEKYKVFTDI SMSLYKDLI AMENL KAML YI I RRS GCRI DDAQI | 840 |
| VACV-DUKE_A10L.pro | I ERI FNAKVGDDVKASMLEEKYKVFTDI SMSLYKDLI AMENL KAML YI I RRS GCRI DDAQI | 840 |

+ Majority

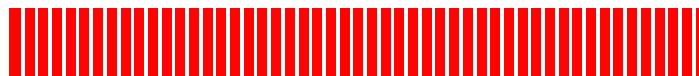

Majority

TTDDL VKSYSLI RPKI LSMI NYYNEMSRGYFEHMKKNL NMT DGDSV SF DDE  
 850 860 870 880 890

|                    |                                                             |     |
|--------------------|-------------------------------------------------------------|-----|
| ACAM2000_A10L.pro  | TTDDL VKSYSLI RPKI LSMI NYYNEMSRGYFEHMKKNL NMT DGDSV SF DDE | 891 |
| DPP9_A10L.pro      | TTDDL VKSYSLI RPKI LSMI NYYNEMSRGYFEHMKKNL NMT DGDSV SF DDE | 891 |
| DPP10_A10L.pro     | TTDDL VKSYSLI RPKI LSMI NYYNEMSRGYFEHMKKNL NMT DGDSV SF DDE | 891 |
| DPP11_A10L.pro     | TTDDL VKSYSLI RPKI LSMI NYYNEMSRGYFEHMKKNL NMT DGDSV SF DDE | 891 |
| DPP12_A10L.pro     | TTDDL VKSYSLI RPKI LSMI NYYNEMSRGYFEHMKKNL NMT DGDSV SF DDE | 891 |
| DPP13_A10L.pro     | TTDDL VKSYSLI RPKI LSMI NYYNEMSRGYFEHMKKNL NMT DGDSV SF DDE | 891 |
| DPP15_A10L.pro     | TTDDL VKSYSLI RPKI LSMI NYYNEMSRGYFEHMKKNL NMT DGDSV SF DDE | 891 |
| DPP16_A10L.pro     | TTDDL VKSYSLI RPKI LSMI NYYNEMSRGYFEHMKKNL NMT DGDSV SF DDE | 891 |
| DPP17_A10L.pro     | TTDDL VKSYSLI RPKI LSMI NYYNEMSRGYFEHMKKNL NMT DGDSV SF DDE | 891 |
| DPP19_A10L.pro     | TTDDL VKSYSLI RPKI LSMI NYYNEMSRGYFEHMKKNL NMT DGDSV SF DDE | 891 |
| DPP20_A10L.pro     | TTDDL VKSYSLI RPKI LSMI NYYNEMSRGYFEHMKKNL NMT DGDSV SF DDE | 891 |
| DPP21_A10L.pro     | TTDDL VKSYSLI RPKI LSMI NYYNEMSRGYFEHMKKNL NMT DGDSV SF DDE | 891 |
| CL3_A10L.pro       | TTDDL VKSYSLI RPKI LSMI NYYNEMSRGYFEHMKKNL NMT DGDSV SF DDE | 891 |
| VACV-3737_A10L.pro | TTDDL VKSYSLI RPKI LSMI NYYNEMSRGYFEHMKKNL NMT DGDSV SF DDE | 891 |
| VACV-DUKE_A10L.pro | TTDDL VKSYSLI RPKI LSMI NYYNEMSRGYFEHMKKNL NMT DGDSV SF DDE | 891 |

## B. A13L

+ Majority

Majority

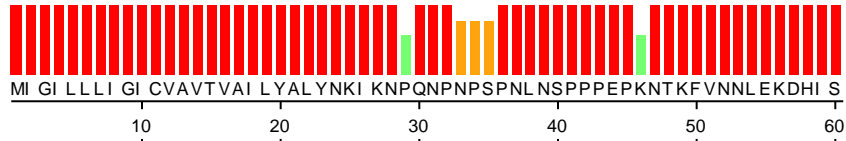

|                    |                                                                       |    |
|--------------------|-----------------------------------------------------------------------|----|
| ACAM2000_A13L.pro  | MI GI LLLI GI CVAVTVAI LYALYNKI KNPQNPNSPNL NSPPPEPRNTKFVNNLEKDHI S   | 60 |
| DPP9_A13L.pro      | MI GI LLLI GI CVAVTVAI LYALYNKI KNPQNPNSPNL NSPPPEPKNTKFVNNLEKDHI S   | 60 |
| DPP10_A13L.pro     | MI GI LLLI GI CVAVTVAI LYALYNKI KNSQNPNSPNL NSPPPEPKNTKFVNNLEKDHI S   | 60 |
| DPP11_A13L.pro     | MI GI LLLI GI CVAVTVAI LYALYNKI KNSQNPNSPNL NSPPPEPKNTKFVNNLEKDHI S   | 60 |
| DPP12_A13L.pro     | MI GI LLLI GI CVAVTVAI LYALYNKI KNSQNPNSPNL NSPPPEPKNTKFVNNLEKDHI S   | 60 |
| DPP13_A13L.pro     | MI GI LLLI GI CVAVTVAI LYALYNKI KNPQNP- - SPNLNSPPPEPRNTKFVNNLEKDHI S | 58 |
| DPP15_A13L.pro     | MI GI LLLI GI CVAVTVAI LYALYNKI KNPQNP- - NPNLNSPPPEPRNTKFVNNLEKDHI S | 58 |
| DPP16_A13L.pro     | MI GI LLLI GI CVAVTVAI LYALYNKI KNSQNPNSPNL NSPPPEPKNTKFVNNLEKDHI S   | 60 |
| DPP17_A13L.pro     | MI GI LLLI GI CVAVTVAI LYALYNKI KNSQNPNSPNL NSPPPEPRNTKFVNNLEKDHI S   | 60 |
| DPP19_A13L.pro     | MI GI LLLI GI CVAVTVAI LYALYNKI KNPQNPNSPNL NSPPPEPKNTKFVNNLEKDHI S   | 60 |
| DPP20_A13L.pro     | MI GI LLLI GI CVAVTVAI LYALYNKI KNPQNPNSPNL NSPPPEPKNTKFVNNLEKDHI S   | 60 |
| DPP21_A13L.pro     | MI GI LLLI GI CVAVTVAI LYALYNKI KNPQNPNSPNL NSPPPEPKNTKFVNNLEKDHI S   | 60 |
| CL3_A13L.pro       | MI GI LLLI GI CVAVTVAI LYALYNKI KNPQNPNSPNL NSPPPEPKNTKFVNNLEKDHI S   | 60 |
| VACV-3737_A13L.pro | MI GI LLLI GI CVAVTVAI LYALYNKI KNSQNPNSPNL NSPPPEPKNTKFVNNLEKDHI S   | 60 |
| VACV-DUKE_A13L.pro | MI GI LLLI GI CVAVTVAI LYALYNKI KNPQNP- - NPNLNSPPPEPKNTKFVNNLEKDHI S | 58 |

+ Majority

Majority

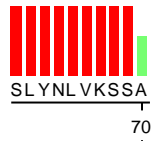

|                    |            |    |
|--------------------|------------|----|
| ACAM2000_A13L.pro  | SLYNLVKSSA | 70 |
| DPP9_A13L.pro      | SLYNLVKSSA | 70 |
| DPP10_A13L.pro     | SLYNLVKSSA | 70 |
| DPP11_A13L.pro     | SLYNLVKSSA | 70 |
| DPP12_A13L.pro     | SLYNLVKSSV | 70 |
| DPP13_A13L.pro     | SLYNLVKSSA | 68 |
| DPP15_A13L.pro     | SLYNLVKSSA | 68 |
| DPP16_A13L.pro     | SLYNLVKSSA | 70 |
| DPP17_A13L.pro     | SLYNLVKSSV | 70 |
| DPP19_A13L.pro     | SLYNLVKSSV | 70 |
| DPP20_A13L.pro     | SLYNLVKSSA | 70 |
| DPP21_A13L.pro     | SLYNLVKSSV | 70 |
| CL3_A13L.pro       | SLYNLVKSSA | 70 |
| VACV-3737_A13L.pro | SLYNLVKSSV | 70 |
| VACV-DUKE_A13L.pro | SLYNLVKSSA | 68 |





+ Majority

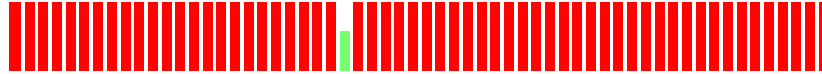

Majority

MFI GSPMYL WFNVNGSQVYHDI YDHNAGFHNK EI GRLLYAFMYL SI SGRFLNDFALLKF  
 190 200 210 220 230 240

ACAM2000\_A26L.pro  
 DFP9\_A26L.pro  
 DFP10\_A26L.pro  
 DFP11\_A26L.pro  
 DFP12\_A26L.pro  
 DFP13\_A26L.pro  
 DFP15\_A26L.pro  
 DFP16\_A26L.pro  
 DFP17\_A26L.pro  
 DFP19\_A26L.pro  
 DFP20\_A26L.pro  
 DFP21\_A26L.pro  
 CL3\_A26L.pro  
 VACV-3737\_A26L.pro  
 VACV-DUKE\_A26L.pro

MFI GSPMYL WFNVNGSQVYHDI YDRNAGFHNK EI GRLLYAFMYL SI SGRFLNDFALLKF 240  
 MFI GSPMYL WFNVNGSQVYHDI YDRNAGFHNK EI GRLLYAFMYL SI SGRFLNDFALLKF 240  
 MFI GSPMYL WFNVNGSQVYHDI YDHNAGFHNK EI GRLLYAFMYL SI SGRFLNDFALLKF 240  
 MFI GSPMYL WFNVNGSQVYHDI YDHNAGFHNK EI GRLLYAFMYL SI SGRFLNDFALLKF 240  
 MFI GSPMYL WFNVNGSQVYHDI YDHNAGFHNK EI GRLLYAFMYL SI SGRFLNDFALLKF 240  
 MFI GSPMYL WFNVNGSQVYHDI YDHNAGFHNK EI GRLLYAFMYL SI SGRFLNDFALLKF 240  
 MFI GSPMYL WFNVNGSQVYHDI YDHNAGFHNK EI GRLLYAFMYL SI SGRFLNDFALLKF 240  
 MFI GSPMYL WFNVNGSQVYHDI YDHNAGFHNK EI GRLLYAFMYL SI SGRFLNDFALLKF 240  
 MFI GSPMYL WFNVNGSQVYHDI YDHNAGFHNK EI GRLLYAFMYL SI SGRFLNDFALLKF 240  
 MFI GSPMYL WFNVNGSQVYHDI YDHNAGFHNK EI GRLLYAFMYL SI SGRFLNDFALLKF 240  
 MFI GSPMYL WFNVNGSQVYHDI YDHNAGFHNK EI GRLLYAFMYL SI SGRFLNDFALLKF 240  
 MFI GSPMYL WFNVNGSQVYHDI YDHNAGFHNK EI GRLLYAFMYL SI SGRFLNDFALLKF 240  
 MFI GSPMYL WFNVNGSQVYHDI YDRNAGFHNK EI GRLLYAFMYL SI SGRFLNDFALLKF 240  
 MFI GSPMYL WFNVNGSQVYHDI YDRNAGFHNK EI GRLLYAFMYL SI SGRFLNDFALLKF 240

+ Majority



Majority

TYL GESWTFSL SVPEYI LYGL GYSVFDTI EKFSND AI LVYI RTNRRNGYDYVEFNK KGI A  
 250 260 270 280 290 300

ACAM2000\_A26L.pro  
 DFP9\_A26L.pro  
 DFP10\_A26L.pro  
 DFP11\_A26L.pro  
 DFP12\_A26L.pro  
 DFP13\_A26L.pro  
 DFP15\_A26L.pro  
 DFP16\_A26L.pro  
 DFP17\_A26L.pro  
 DFP19\_A26L.pro  
 DFP20\_A26L.pro  
 DFP21\_A26L.pro  
 CL3\_A26L.pro  
 VACV-3737\_A26L.pro  
 VACV-DUKE\_A26L.pro

TYL GESWTFSL SVPEYI LYGL GYSVFDTI EKFSND AI LVYI RTNRRNGYDYVEFNK KGI A 300  
 TYL GESWTFSL SVPEYI LYGL GYSVFDTI EKFSND AI LVYI RTNRRNGYDYVEFNK KGI A 300  
 TYL GESWTFSL SVPEYI LYGL GYSVFDTI EKFSND AI LVYI RTNRRNGYDYVEFNK KGI A 300  
 TYL GESWTFSL SVPEYI LYGL GYSVFDTI EKFSND AI LVYI RTNRRNGYDYVEFNK KGI A 300  
 TYL GESWTFSL SVPEYI LYGL GYSVFDTI EKFSND AI LVYI RTNRRNGYDYVEFNK KGI A 300  
 TYL GESWTFSL SVPEYI LYGL GYSVFDTI EKFSND AI LVYI RTNRRNGYDYVEFNK KGI A 300  
 TYL GESWTFSL SVPEYI LYGL GYSVFDTI EKFSND AI LVYI RTNRRNGYDYVEFNK KGI A 300  
 TYL GESWTFSL SVPEYI LYGL GYSVFDTI EKFSND AI LVYI RTNRRNGYDYVEFNK KGI A 300  
 TYL GESWTFSL SVPEYI LYGL GYSVFDTI EKFSND AI LVYI RTNRRNGYDYVEFNK KGI A 300  
 TYL GESWTFSL SVPEYI LYGL GYSVFDTI EKFSND AI LVYI RTNRRNGYDYVEFNK KGI A 300  
 TYL GESWTFSL SVPEYI LYGL GYSVFDTI EKFSND AI LVYI RTNRRNGYDYVEFNK KGI A 300  
 TYL GESWTFSL SVPEYI LYGL GYSVFDTI EKFSND AI LVYI RTNRRNGYDYVEFNK KGI A 300  
 TYL GESWTFSL SVPEYI LYGL GYSVFDTI EKFSND AI LVYI RTNRRNGYDYVEFNK KGI A 300  
 TYL GESWTFSL SVPEYI LYGL GYSVFDTI EKFSND AI LVYI RTNRRNGYDYVEFNK KGI A 300

+ Majority

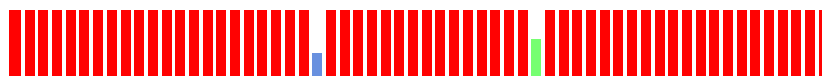

Majority

KVTEAKPDNDKRI HAI RLI NDSSDVQHI HFGFRNMVI I DNECANI QSSAENATDTGHHQD  
 310 320 330 340 350 360

ACAM2000\_A26L.pro  
 DFP9\_A26L.pro  
 DFP10\_A26L.pro  
 DFP11\_A26L.pro  
 DFP12\_A26L.pro  
 DFP13\_A26L.pro  
 DFP15\_A26L.pro  
 DFP16\_A26L.pro  
 DFP17\_A26L.pro  
 DFP19\_A26L.pro  
 DFP20\_A26L.pro  
 DFP21\_A26L.pro  
 CL3\_A26L.pro  
 VACV-3737\_A26L.pro  
 VACV-DUKE\_A26L.pro

KVTEAKPDNDKRI HAI RLI NDSSDVQHI HFGFRNMVI I DNECANI QSSAENATDTGHHQD 360  
 KVTEAKPDNDKRI HAI RLI NDSTDVQHI HFGFRNMVI I DNECANI QSSAENATDTGHHQD 360  
 KVTEAKPDNDKRI HAI RLI NDSSDVQHI HFGFRNMVI I NNECANI QSSAENATDTGHHQD 360  
 KVTEAKPDNDKRI HAI RLI NDSTDVQHI HFGFRNMVI I DNECANI QSSAENATDTGHHQD 360  
 KVTEAKPDNDKRI HAI RLI NDSSDVQHI HFGFRNMVI I DNECANI QSSAENATDTGHHQD 360  
 KVTEAKPDNDKRI HAI RLI NDSTDVQHI HFGFRNMVI I DNECANI QSSAENATDTGHHQD 360  
 KVTEAKPDNDKRI HAI RLI NDSSDVQHI HFGFRNMVI I NNECANI QSSAENATDTGHHQD 360  
 KVTEAKPDNDKRI HAI RLI NDSTDVQHI HFGFRNMVI I DNECANI QSSAENATDTGHHQD 360  
 KVTEAKPDNDKRI HAI RLI NDSSDVQHI HFGFRNMVI I NNECANI QSSAENATDTGHHQD 360  
 KVTEAKPDNDKRI HAI RLI NDSTDVQHI HFGFRNMVI I DNECANI QSSAENATDTGHHQD 360  
 KVTEAKPDNDKRI HAI RLI NDSSDVQHI HFGFRNMVI I NNECANI QSSAENATDTGHHQD 360  
 KVTEAKPDNDKRI HAI RLI NDSTDVQHI HFGFRNMVI I DNECANI QSSAENATDTGHHQD 360  
 KVTEAKPDNDKRI HAI RLI NDSSDVQHI HFGFRNMVI I NNECANI QSSAENATDTGHHQD 360  
 KVTEAKPDNDKRI HAI RLI NDSTDVQHI HFGFRNMVI I DNECANI QSSAENATDTGHHQD 360



+ Majority

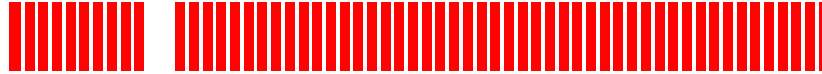

Majority

SKI NI EVEDD- - VI DDDDDYNPKPTPI PEPHPRPPFPRHEYHKRPKLLPVEEPDPVKKDAD  
 370 380 390 400 410 420

|                    |                                                                     |     |
|--------------------|---------------------------------------------------------------------|-----|
| ACAM2000_A26L.pro  | SKI NI EVEDD- - VI DDDDDYNPKPTPI PEPHPRPPFPRHEYHKRPKLLPVEEPDPVKKDAD | 418 |
| DFF9_A26L.pro      | SKI NI EVEDD- - VI DDDDDYNPKPTPI PEPHPRPPFPRHEYHKRPKLLPVEEPDPVKKDAD | 418 |
| DFF10_A26L.pro     | SKI NI EVEDD- - VI DDDDDYNPKPTPI PEPHPRPPFPRHEYHKRPKLLPVEEPDPVKKDAD | 418 |
| DFF11_A26L.pro     | SKI NI EVEDD- - VI DDDDDYNPKPTPI PEPHPRPPFPRHEYHKRPKLLPVEEPDPVKKDAD | 418 |
| DFF12_A26L.pro     | SKI NI EVEDD- - VI DDDDDYNPKPTPI PEPHPRPPFPRHEYHKRPKLLPVEEPDPVKKDAD | 418 |
| DFF13_A26L.pro     | SKI NI EVEDD- - VI DDDDDYNPKPTPI PEPHPRPPFPRHEYHKRPKLLPVEEPDPVKKDAD | 418 |
| DFF15_A26L.pro     | SKI NI EVEDD- - VI DDDDDYNPKPTPI PEPHPRPPFPRHEYHKRPKLLPVEEPDPVKKDAD | 418 |
| DFF16_A26L.pro     | SKI NI EVEDD- - VI DDDDDYNPKPTPI PEPHPRPPFPRHEYHKRPKLLPVEEPDPVKKDAD | 418 |
| DFF17_A26L.pro     | SKI NI EVEDD- - VI DDDDDYNPKPTPI PEPHPRPPFPRHEYHKRPKLLPVEEPDPVKKDAD | 418 |
| DFF19_A26L.pro     | SKI NI EVEDD- - VI DDDDDYNPKPTPI PEPHPRPPFPRHEYHKRPKLLPVEEPDPVKKDAD | 418 |
| DFF20_A26L.pro     | SKI NI EVEDD- - VI DDDDDYNPKPTPI PEPHPRPPFPRHEYHKRPKLLPVEEPDPVKKDAD | 418 |
| DFF21_A26L.pro     | SKI NI EVEDD- - VI DDDDDYNPKPTPI PEPHPRPPFPRHEYHKRPKLLPVEEPDPVKKDAD | 418 |
| CL3_A26L.pro       | SKI NI EVEDD- - VI DDDDDYNPKPTPI PEPHPRPPFPRHEYHKRPKLLPVEEPDPVKKDAD | 418 |
| VACV-3737_A26L.pro | SKI NI EVEDDDVI DDDDDYNPKPTPI PEPHPRPPFPRHEYHKRPKLLPVEEPDPVKKDAD    | 420 |
| VACV-DUKE_A26L.pro | SKI NI EVEDD- - VI DDDDDYNPKPTPI PEPHPRPPFPRHEYHKRPKLLPVEEPDPVKKDAD | 418 |

+ Majority

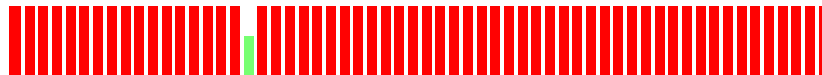

Majority

RI RLDNHI LNTLDHNLNFI GHYCCDTAAVDRL EHHI ETLGQYAVI LARKI NMQTL LFPWP  
 430 440 450 460 470 480

|                    |                                                                      |     |
|--------------------|----------------------------------------------------------------------|-----|
| ACAM2000_A26L.pro  | RI RLDNHI LNTLDHNLNFI GHYCCDTAAVDRL EHHI ETLGQYAVI LARKI NMQTL LFPWP | 478 |
| DFF9_A26L.pro      | RI RLDNHI LNTLDHNLNFI GHYCCDTAAVDRL EHHI ETLGQYAVI LARKI NMQTL LFPWP | 478 |
| DFF10_A26L.pro     | RI RLDNHI LNTLDHNLNFI GHYCCDTAAVDRL EHHI ETLGQYAVI LARKI NMQTL LFPWP | 478 |
| DFF11_A26L.pro     | RI RLDNHI LNTLDHNLNSI GHYCCDTAAVDRL EHHI ETLGQYAVI LARKI NMQTL LFPWP | 478 |
| DFF12_A26L.pro     | RI RLDNHI LNTLDHNLNFI GHYCCDTAAVDRL EHHI ETLGQYAVI LARKI NMQTL LFPWP | 478 |
| DFF13_A26L.pro     | RI RLDNHI LNTLDHNLNFI GHYCCDTAAVDRL EHHI ETLGQYAVI LARKI NMQTL LFPWP | 478 |
| DFF15_A26L.pro     | RI RLDNHI LNTLDHNLNFI GHYCCDTAAVDRL EHHI ETLGQYAVI LARKI NMQTL LFPWP | 478 |
| DFF16_A26L.pro     | RI RLDNHI LNTLDHNLNFI GHYCCDTAAVDRL EHHI ETLGQYAVI LARKI NMQTL LFPWP | 478 |
| DFF17_A26L.pro     | RI RLDNHI LNTLDHNLNFI GHYCCDTAAVDRL EHHI ETLGQYAVI LARKI NMQTL LFPWP | 478 |
| DFF19_A26L.pro     | RI RLDNHI LNTLDHNLNSI GHYCCDTAAVDRL EHHI ETLGQYAVI LARKI NMQTL LFPWP | 478 |
| DFF20_A26L.pro     | RI RLDNHI LNTLDHNLNFI GHYCCDTAAVDRL EHHI ETLGQYAVI LARKI NMQTL LFPWP | 478 |
| DFF21_A26L.pro     | RI RLDNHI LNTLDHNLNFI GHYCCDTAAVDRL EHHI ETLGQYAVI LARKI NMQTL LFPWP | 478 |
| CL3_A26L.pro       | RI RLDNHI LNTLDHNLNFI GHYCCDTAAVDRL EHHI ETLGQYAVI LARKI NMQTL LFPWP | 478 |
| VACV-3737_A26L.pro | RI RLDNHI LNTLDHNLNSI GHYCCDTAAVDRL EHHI ETLGQYAVI LARKI NMQTL LFPWP | 480 |
| VACV-DUKE_A26L.pro | RI RLDNHI LNTLDHNLNSI GHYCCDTAAVDRL EHHI ETLGQYAVI LARKI NMQTL LFPWP | 478 |

+ Majority

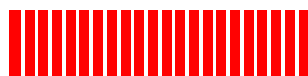

Majority

LPTVHPHAI DGS I PPHGRSTI L  
 490 500

|                    |                            |     |
|--------------------|----------------------------|-----|
| ACAM2000_A26L.pro  | LPTVHPHAI DGS I PPHGRSTI L | 500 |
| DFF9_A26L.pro      | LPTVHPHAI DGS I PPHGRSTI L | 500 |
| DFF10_A26L.pro     | LPTVHPHAI DGS I PPHGRSTI L | 500 |
| DFF11_A26L.pro     | LPTVHPHAI DGS I PPHGRSTI L | 500 |
| DFF12_A26L.pro     | LPTVHPHAI DGS I PPHGRSTI L | 500 |
| DFF13_A26L.pro     | LPTVHPHAI DGS I PPHGRSTI L | 500 |
| DFF15_A26L.pro     | LPTVHPHAI DGS I PPHGRSTI L | 500 |
| DFF16_A26L.pro     | LPTVHPHAI DGS I PPHGRSTI L | 500 |
| DFF17_A26L.pro     | LPTVHPHAI DGS I PPHGRSTI L | 500 |
| DFF19_A26L.pro     | LPTVHPHAI DGS I PPHGRSTI L | 500 |
| DFF20_A26L.pro     | LPTVHPHAI DGS I PPHGRSTI L | 500 |
| DFF21_A26L.pro     | LPTVHPHAI DGS I PPHGRSTI L | 500 |
| CL3_A26L.pro       | LPTVHPHAI DGS I PPHGRSTI L | 500 |
| VACV-3737_A26L.pro | LPTVHPHAI DGS I PPHGRSTI L | 502 |
| VACV-DUKE_A26L.pro | LPTVHPHAI DGS I PPHGRSTI L | 500 |

## D. A38L

+ Majority

Majority

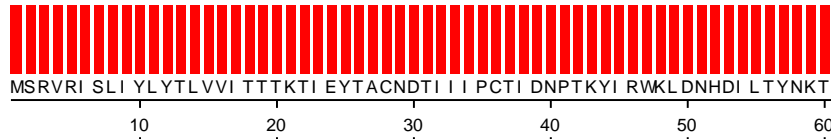

|                    |                                                                        |    |
|--------------------|------------------------------------------------------------------------|----|
| ACAM2000_A38L.pro  | MSRVRI SLI YLYTLVVI TTTKTI EYTACNDTI I I PCTI DNPTKYI RWKLDNHHI LTYNKI | 60 |
| DFF9_A38L.pro      | MSRVRI SLI YLYTLVVI TTTKTI EYTACNDTI I I PCTI DNPTKYI RWKLDNHHI LTYNKI | 60 |
| DFF10_A38L.pro     | MSRVRI SLI YLYTLVVI TTTKTI EYTACNDTI I I PCTI DNPTKYI RWKLDNHHI LTYNKI | 60 |
| DFF11_A38L.pro     | MSRVRI SLI YLYTLVVI TTTKTI EYTACNDTI I I PCTI DNPTKYI RWKLDNHHI LTYNKI | 60 |
| DFF12_A38L.pro     | MSRVRI SLI YLYTLVVI TTTKTI EYTACNDTI I I PCTI DNPTKYI RWKLDNHHI LTYNKI | 60 |
| DFF13_A38L.pro     | MSRVRI SLI YLYTLVVI TTTKTI EYTACNDTI I I PCTI DNPTKYI RWKLDNHHI LTYNKI | 60 |
| DFF15_A38L.pro     | MSRVRI SLI YLYTLVVI TTTKTI EYTACNDTI I I PCTI DNPTKYI RWKLDNHHI LTYNKI | 60 |
| DFF16_A38L.pro     | MSRVRI SLI YLYTLVVI TTTKTI EYTACNDTI I I PCTI DNPTKYI RWKLDNHHI LTYNKI | 60 |
| DFF17_A38L.pro     | MSRVRI SLI YLYTLVVI TTTKTI EYTACNDTI I I PCTI DNPTKYI RWKLDNHHI LTYNKI | 60 |
| DFF19_A38L.pro     | MSRVRI SLI YLYTLVVI TTTKTI EYTACNDTI I I PCTI DNPTKYI RWKLDNHHI LTYNKI | 60 |
| DFF20_A38L.pro     | MSRVRI SLI YLYTLVVI TTTKTI EYTACNDTI I I PCTI DNPTKYI RWKLDNHHI LTYNKI | 60 |
| DFF21_A38L.pro     | MSRVRI SLI YLYTLVVI TTTKTI EYTACNDTI I I PCTI DNPTKYI RWKLDNHHI LTYNKI | 60 |
| CL3_A38L.pro       | MSRVRI SLI YLYTLVVI TTTKTI EYTACNDTI I I PCTI DNPTKYI RWKLDNHHI LTYNKI | 60 |
| VACV-3737_A38L.pro | MSRVRI SLI YLYTLVVI TTTKTI EYTACNDTI I I PCTI DNPTKYI RWKLDNHHI LTYNKI | 60 |
| VACV-DUKE_A38L.pro | MSRVRI SLI YLYTLVVI TTTKTI EYTACNDTI I I PCTI DNPTKYI RWKLDNHHI LTYNKI | 60 |

+ Majority

Majority

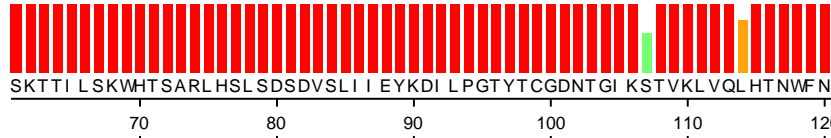

|                    |                                                                   |     |
|--------------------|-------------------------------------------------------------------|-----|
| ACAM2000_A38L.pro  | SKTTI LSKWHTSARLHSLSDSDVSLI I EYKDI LPGTYTCGDNTGI KSTVKLVQLHTNWFN | 120 |
| DFF9_A38L.pro      | SKTTI LSKWHTSARLHSLSDSDVSLI I EYKDI LPGTYTCGDNTGI KSTVKLVQLHTNWFN | 120 |
| DFF10_A38L.pro     | SKTTI LSKWHTSARLHSLSDSDVSLI I EYKDI LPGTYTCGDNTGI KSTVKLVQLHTNWFN | 120 |
| DFF11_A38L.pro     | SKTTI LSKWHTSARLHSLSDSDVSLI I EYKDI LPGTYTCGDNTGI KSTVKLVQLHTNWFN | 120 |
| DFF12_A38L.pro     | SKTTI LSKWHTSARLHSLSDSDVSLI I EYKDI LPGTYTCGDNTGI KSTVKLVQLHTNWFN | 120 |
| DFF13_A38L.pro     | SKTTI LSKWHTSARLHSLSDSDVSLI I EYKDI LPGTYTCGDNTGI KSTVKLVQLHTNWFN | 120 |
| DFF15_A38L.pro     | SKTTI LSKWHTSARLHSLSDSDVSLI I EYKDI LPGTYTCGDNTGI KSTVKLVQLHTNWFN | 120 |
| DFF16_A38L.pro     | SKTTI LSKWHTSARLHSLSDSDVSLI I EYKDI LPGTYTCGDNTGI KSTVKLVQLHTNWFN | 120 |
| DFF17_A38L.pro     | SKTTI LSKWHTSARLHSLSDSDVSLI I EYKDI LPGTYTCGDNTGI KSTVKLVQLHTNWFN | 120 |
| DFF19_A38L.pro     | SKTTI LSKWHTSARLHSLSDSDVSLI I EYKDI LPGTYTCGDNTGI KSTVKLVQLHTNWFN | 120 |
| DFF20_A38L.pro     | SKTTI LSKWHTSARLHSLSDSDVSLI I EYKDI LPGTYTCGDNTGI KSTVKLVQLHTNWFN | 120 |
| DFF21_A38L.pro     | SKTTI LSKWHTSARLHSLSDSDVSLI I EYKDI LPGTYTCGDNTGI KSTVKLVQLHTNWFN | 120 |
| CL3_A38L.pro       | SKTTI LSKWHTSARLHSLSDSDVSLI I EYKDI LPGTYTCGDNTGI KSTVKLVQLHTNWFN | 120 |
| VACV-3737_A38L.pro | SKTTI LSKWHTSARLHSLSDSDVSLI I EYKDI LPGTYTCGDNTGI KSTVKLVQLHTNWFN | 120 |
| VACV-DUKE_A38L.pro | SKTTI LSKWHTSARLHSLSDSDVSLI I EYKDI LPGTYTCGDNTGI KSTVKLVQLHTNWFN | 120 |

+ Majority

Majority

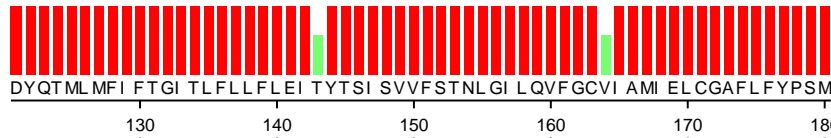

|                    |                                                                     |     |
|--------------------|---------------------------------------------------------------------|-----|
| ACAM2000_A38L.pro  | DYQTMLMFI FTGI TLFLLFLEI TYTSI SVVFSTNLGI LQVFGCVI AMI ELCGAFLFYPSM | 180 |
| DFF9_A38L.pro      | DYQTMLMFI FTGI TLFLLFLEI TYTSI SVVFSTNLGI LQVFGCVI AMI ELCGAFLFYPSM | 180 |
| DFF10_A38L.pro     | DYQTMLMFI FTGI TLFLLFLEI TYTSI SVVFSTNLGI LQVFGCVI AMI ELCGAFLFYPSM | 180 |
| DFF11_A38L.pro     | DYQTMLMFI FTGI TLFLLFLEI TYTSI SVVFSTNLGI LQVFGCVI AMI ELCGAFLFYPSM | 180 |
| DFF12_A38L.pro     | DYQTMLMFI FTGI TLFLLFLEI TYTSI SVVFSTNLGI LQVFGCVI AMI ELCGAFLFYPSM | 180 |
| DFF13_A38L.pro     | DYQTMLMFI FTGI TLFLLFLEI TYTSI SVVFSTNLGI LQVFGCVI AMI ELCGAFLFYPSM | 180 |
| DFF15_A38L.pro     | DYQTMLMFI FTGI TLFLLFLEI TYTSI SVVFSTNLGI LQVFGCVI AMI ELCGAFLFYPSM | 180 |
| DFF16_A38L.pro     | DYQTMLMFI FTGI TLFLLFLEI TYTSI SVVFSTNLGI LQVFGCVI AMI ELCGAFLFYPSM | 180 |
| DFF17_A38L.pro     | DYQTMLMFI FTGI TLFLLFLEI TYTSI SVVFSTNLGI LQVFGCVI AMI ELCGAFLFYPSM | 180 |
| DFF19_A38L.pro     | DYQTMLMFI FTGI TLFLLFLEI TYTSI SVVFSTNLGI LQVFGCVI AMI ELCGAFLFYPSM | 180 |
| DFF20_A38L.pro     | DYQTMLMFI FTGI TLFLLFLEI TYTSI SVVFSTNLGI LQVFGCVI AMI ELCGAFLFYPSM | 180 |
| DFF21_A38L.pro     | DYQTMLMFI FTGI TLFLLFLEI TYTSI SVVFSTNLGI LQVFGCVI AMI ELCGAFLFYPSM | 180 |
| CL3_A38L.pro       | DYQTMLMFI FTGI TLFLLFLEI TYTSI SVVFSTNLGI LQVFGCVI AMI ELCGAFLFYPSM | 180 |
| VACV-3737_A38L.pro | DYQTMLMFI FTGI TLFLLFLEI TYTSI SVVFSTNLGI LQVFGCVI AMI ELCGAFLFYPSM | 180 |
| VACV-DUKE_A38L.pro | DYQTMLMFI FTGI TLFLLFLEI TYTSI SVVFSTNLGI LQVFGCVI AMI ELCGAFLFYPSM | 180 |

+ Majority

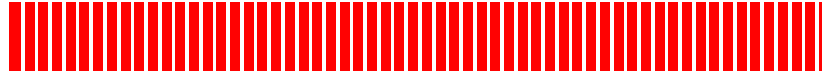

Majority

FTLRHIIGLLMMTLPSIFLIITKVFSEFWLLCKLSCAVHLIIYYQLAGYI LTVLGLGLSLK  
 190 200 210 220 230 240

|                    |                                                                |     |
|--------------------|----------------------------------------------------------------|-----|
| ACAM2000_A38L.pro  | FTLRHIIGLLMMTLPSIFLIITKVFSEFWLLCKLSCAVHLIIYYQLAGYI LTVLGLGLSLK | 240 |
| DPP9_A38L.pro      | FTLRHIIGLLMMTLPSIFLIITKVFSEFWLLCKLSCAVHLIIYYQLAGYI LTVLGLGLSLK | 240 |
| DPP10_A38L.pro     | FTLRHIIGLLMMTLPSIFLIITKVFSEFWLLCKLSCAVHLIIYYQLAGYI LTVLGLGLSLK | 240 |
| DPP11_A38L.pro     | FTLRHIIGLLMMTLPSIFLIITKVFSEFWLLCKLSCAVHLIIYYQLAGYI LTVLGLGLSLK | 240 |
| DPP12_A38L.pro     | FTLRHIIGLLMMTLPSIFLIITKVFSEFWLLCKLSCAVHLIIYYQLAGYI LTVLGLGLSLK | 240 |
| DPP13_A38L.pro     | FTLRHIIGLLMMTLPSIFLIITKVFSEFWLLCKLSCAVHLIIYYQLAGYI LTVLGLGLSLK | 240 |
| DPP15_A38L.pro     | FTLRHIIGLLMMTLPSIFLIITKVFSEFWLLCKLSCAVHLIIYYQLAGYI LTVLGLGLSLK | 240 |
| DPP16_A38L.pro     | FTLRHIIGLLMMTLPSIFLIITKVFSEFWLLCKLSCAVHLIIYYQLAGYI LTVLGLGLSLK | 240 |
| DPP17_A38L.pro     | FTLRHIIGLLMMTLPSIFLIITKVFSEFWLLCKLSCAVHLIIYYQLAGYI LTVLGLGLSLK | 240 |
| DPP19_A38L.pro     | FTLRHIIGLLMMTLPSIFLIITKVFSEFWLLCKLSCAVHLIIYYQLAGYI LTVLGLGLSLK | 240 |
| DPP20_A38L.pro     | FTLRHIIGLLMMTLPSIFLIITKVFSEFWLLCKLSCAVHLIIYYQLAGYI LTVLGLGLSLK | 240 |
| DPP21_A38L.pro     | FTLRHIIGLLMMTLPSIFLIITKVFSEFWLLCKLSCAVHLIIYYQLAGYI LTVLGLGLSLK | 240 |
| CL3_A38L.pro       | FTLRHIIGLLMMTLPSIFLIITKVFSEFWLLCKLSCAVHLIIYYQLAGYI LTVLGLGLSLK | 240 |
| VACV-3737_A38L.pro | FTLRHIIGLLMMTLPSIFLIITKVFSEFWLLCKLSCAVHLIIYYQLAGYI LTVLGLGLSLK | 240 |
| VACV-DUKE_A38L.pro | FTLRHIIGLLMMTLPSIFLIITKVFSEFWLLCKLSCAVHLIIYYQLAGYI LTVLGLGLSLK | 240 |

+ Majority

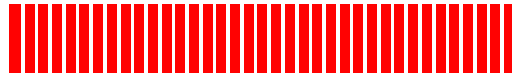

Majority

ECVDGTL LLLSGLGTI MVSEHFSLLFLVCFPSTQRDYY  
 250 260 270

|                    |                                          |     |
|--------------------|------------------------------------------|-----|
| ACAM2000_A38L.pro  | ECVDGTL LLLSGLGTI MVSEHFSLLFLVCFPSTQRDYY | 277 |
| DPP9_A38L.pro      | ECVDGTL LLLSGLGTI MVSEHFSLLFLVCFPSTQRDYY | 277 |
| DPP10_A38L.pro     | ECVDGTL LLLSGLGTI MVSEHFSLLFLVCFPSTQRDYY | 277 |
| DPP11_A38L.pro     | ECVDGTL LLLSGLGTI MVSEHFSLLFLVCFPSTQRDYY | 277 |
| DPP12_A38L.pro     | ECVDGTL LLLSGLGTI MVSEHFSLLFLVCFPSTQRDYY | 277 |
| DPP13_A38L.pro     | ECVDGTL LLLSGLGTI MVSEHFSLLFLVCFPSTQRDYY | 277 |
| DPP15_A38L.pro     | ECVDGTL LLLSGLGTI MVSEHFSLLFLVCFPSTQRDYY | 277 |
| DPP16_A38L.pro     | ECVDGTL LLLSGLGTI MVSEHFSLLFLVCFPSTQRDYY | 277 |
| DPP17_A38L.pro     | ECVDGTL LLLSGLGTI MVSEHFSLLFLVCFPSTQRDYY | 277 |
| DPP19_A38L.pro     | ECVDGTL LLLSGLGTI MVSEHFSLLFLVCFPSTQRDYY | 277 |
| DPP20_A38L.pro     | ECVDGTL LLLSGLGTI MVSEHFSLLFLVCFPSTQRDYY | 277 |
| DPP21_A38L.pro     | ECVDGTL LLLSGLGTI MVSEHFSLLFLVCFPSTQRDYY | 277 |
| CL3_A38L.pro       | ECVDGTL LLLSGLGTI MVSEHFSLLFLVCFPSTQRDYY | 277 |
| VACV-3737_A38L.pro | ECVDGTL LLLSGLGTI MVSEHFSLLFLVCFPSTQRDYY | 277 |
| VACV-DUKE_A38L.pro | ECVDGTL LLLSGLGTI MVSEHFSLLFLVCFPSTQRDYY | 277 |

## E. B19R

+ Majority

Majority

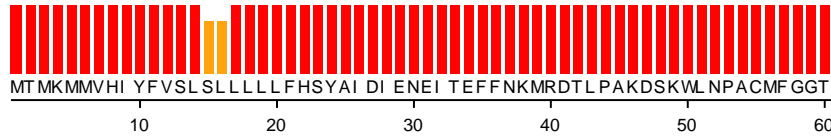

|                    |                                                                        |    |
|--------------------|------------------------------------------------------------------------|----|
| ACAM2000_B19R.pro  | MTMKMMVHI YFVSL SLLLLL FHSHYAI DI ENEI TEFFNKMRDTLPAKDSKWLNPACMFGGT    | 60 |
| DPP9_B19R.pro      | MTMKMMVHI YFVSL SLLLLL FHSHYAI DI ENEI TEFFNKMRDTLPAKDSKWLNPACMFGGT    | 60 |
| DPP10_B19R.pro     | MTMKMMVHI YFVSL SLLLLL FHSHYAI DI ENEI TEFFNKMRDTLPAKDSKWLNPACMFGGT    | 60 |
| DPP11_B19R.pro     | MTMKMMVHI YFVSL SLLLLL FHSHYAI DI ENEI TEFFNKMRDTLPAKDSKWLNPACMFGGT    | 60 |
| DPP12_B19R.pro     | MTMKMMVHI YFVSL SLLLLL FHSHYAI DI ENEI TEFFNKMRDTLPAKDSKWLNPACMFGGT    | 60 |
| DPP13_B19R.pro     | MTMKMMVHI YFVSL SLLLLL FHSHYAI DI ENEI TEFFNKMRDTLPAKDSKWLNPACMFGGT    | 60 |
| DPP15_B19R.pro     | MTMKMMVHI YFVSL SLLLLL FHSHYAI DI ENEI TEFFNKMRDTLPAKDSKWLNPACMFGGT    | 60 |
| DPP16_B19R.pro     | MTMKMMVHI YFVSL SLLLLL FHSHYAI DI ENEI TEFFNKMRDTLPAKDSKWLNPACMFGGT    | 60 |
| DPP19_B19R.pro     | MTMKMMVHI YFVSL SLLLLL FHSHYAI DI ENEI TEFFNKMRDTLPAKDSKWLNPACMFGGT    | 60 |
| DPP20_B19R.pro     | MTMKMMVHI YFVSL SLLLLL FHSHYAI DI ENEI TEFFNKMRDTLPAKDSKWLNPACMFGGT    | 60 |
| DPP21_B19R.pro     | MTMKMMVHI YFVSL SLLLLL FHSHYAI DI ENEI TEFFNKMRDTLPAKDSKWLNPACMFGGT    | 60 |
| CL3_B19R.pro       | MTMKMMVHI YFVSL SLLLLL FHSHYAI DI ENEI TEFFNKMRDTLPAKDSKWLNPACMFGGT    | 60 |
| VACV-3737_B19R.pro | MTMKMMVHI YFVSL SLLLLL FHSHYAI DI ENEI TEFFNKMRDTLPAKDSKWLNPACMFGGT    | 60 |
| VACV-DUKE_B19R.pro | MTMKMMVHI YFVSL - - LLLLL FHSHYAI DI ENEI TEFFNKMRDTLPAKDSKWLNPACMFGGT | 58 |

+ Majority

Majority

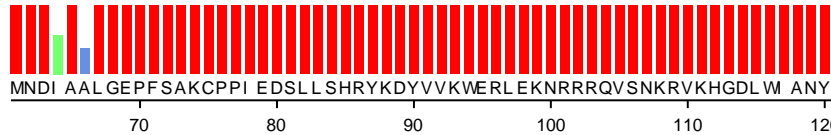

|                    |                                                                 |     |
|--------------------|-----------------------------------------------------------------|-----|
| ACAM2000_B19R.pro  | MNDMATL GEPFSAKCPPI EDSLLSHRYKDYVVKWERLEKNRRRQVSNKRVKHGDLW ANY  | 120 |
| DPP9_B19R.pro      | MNDI AALGEPFSAKCPPI EDSLLSHRYKDYVVKWERLEKNRRRQVSNKRVKHGDLW ANY  | 120 |
| DPP10_B19R.pro     | MNDMATL GEPFSAKCPPI EDSLLSHRYKDYVVKWERLEKNRRRQVSNKRVKHGDLW ANY  | 120 |
| DPP11_B19R.pro     | MNDI AALGEPFSAKCPPI EDSLLSHRYKDYVVKWERLEKNRRRQVSNKRVKHGDLW ANY  | 120 |
| DPP12_B19R.pro     | MNDMATL GEPFSAKCPPI EDSLLSHRYKDYVVKWERLEKNRRRQVSNKRVKHGDLW ANY  | 120 |
| DPP13_B19R.pro     | MNDI AALGEPFSAKCPPI EDSLLSHRYKDYVVKWERLEKNRRRQVSNKRVKHGDLW ANY  | 120 |
| DPP15_B19R.pro     | MNDMATL GEPFSAKCPPI EDSLLSHRYKDYVVKWERLEKNRRRQVSNKRVKHGDLW ANY  | 120 |
| DPP16_B19R.pro     | MNDI AALGEPFSAKCPPI EDSLLSHRYKDYVVKWERLEKNRRRQVSNKRVKHGDLW ANY  | 120 |
| DPP19_B19R.pro     | MNDI AALGEPFSAKCPPI EDSLLSHRYKDYVVKWERLEKNRRRQVSNKRVKHGDLW ANY  | 120 |
| DPP20_B19R.pro     | MNDI ATL GEPFSAKCPPI EDSLLSHRYKDYVVKWERLEKNRRRQVSNKRVKHGDLW ANY | 120 |
| DPP21_B19R.pro     | MNDMATL GEPFSAKCPPI EDSLLSHRYKDYVVKWERLEKNRRRQVSNKRVKHGDLW ANY  | 120 |
| CL3_B19R.pro       | MNDI AALGEPFSAKCPPI EDSLLSHRYKDYVVKWERLEKNRRRQVSNKRVKHGDLW ANY  | 120 |
| VACV-3737_B19R.pro | MNDI AALGEPFSAKCPPI EDSLLSHRYKDYVVKWERLEKNRRRQVSNKRVKHGDLW ANY  | 120 |
| VACV-DUKE_B19R.pro | MNDI AALGEPFSAKCPPI EDSLLSHRYKDYVVKWERLEKNRRRQVSNKRVKHGDLW ANY  | 118 |

+ Majority

Majority

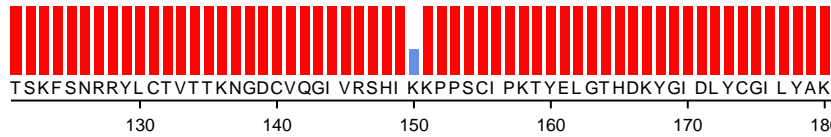

|                    |                                                                   |     |
|--------------------|-------------------------------------------------------------------|-----|
| ACAM2000_B19R.pro  | TSKFSNRRYLCTVTTKNGDCVQGI VRSHI RKPPSCI PKTYELGTHDKYGI DLYCGI LYAK | 180 |
| DPP9_B19R.pro      | TSKFSNRRYLCTVTTKNGDCVQGI VRSHI RKPPSCI PKTYELGTHDKYGI DLYCGI LYAK | 180 |
| DPP10_B19R.pro     | TSKFSNRRYLCTVTTKNGDCVQGI VRSHI KKPPSCI PKTYELGTHDKYGI DLYCGI LYAK | 180 |
| DPP11_B19R.pro     | TSKFSNRRYLCTVTTKNGDCVQGI VRSHI RKPPSCI PKTYELGTHDKYGI DLYCGI LYAK | 180 |
| DPP12_B19R.pro     | TSKFSNRRYLCTVTTKNGDCVQGI VRSHI RKPPSCI PKTYELGTHDKYGI DLYCGI LYAK | 180 |
| DPP13_B19R.pro     | TSKFSNRRYLCTVTTKNGDCVQGI VRSHI KKPPSCI PKTYELGTHDKYGI DLYCGI LYAK | 180 |
| DPP15_B19R.pro     | TSKFSNRRYLCTVTTKNGDCVQGI VRSHI KKPPSCI PKTYELGTHDKYGI DLYCGI LYAK | 180 |
| DPP16_B19R.pro     | TSKFSNRRYLCTVTTKNGDCVQGI VRSHI KKPPSCI PKTYELGTHDKYGI DLYCGI LYAK | 180 |
| DPP19_B19R.pro     | TSKFSNRRYLCTVTTKNGDCVQGI VRSHI RKPPSCI PKTYELGTHDKYGI DLYCGI LYAK | 180 |
| DPP20_B19R.pro     | TSKFSNRRYLCTVTTKNGDCVQGI VRSHI RKPPSCI PKTYELGTHDKYGI DLYCGI LYAK | 180 |
| DPP21_B19R.pro     | TSKFSNRRYLCTVTTKNGDCVQGI VRSHI KKPPSCI PKTYELGTHDKYGI DLYCGI LYAK | 180 |
| CL3_B19R.pro       | TSKFSNRRYLCTVTTKNGDCVQGI VRSHI KKPPSCI PKTYELGTHDKYGI DLYCGI LYAK | 180 |
| VACV-3737_B19R.pro | TSKFSNRRYLCTVTTKNGDCVQGI VRSHI KKPPSCI PKTYELGTHDKYGI DLYCGI LYAK | 180 |
| VACV-DUKE_B19R.pro | TSKFSNRRYLCTVTTKNGDCVQGI VRSHI KKPPSCI PKTYELGTHDKYGI DLYCGI LYAK | 178 |

+ Majority

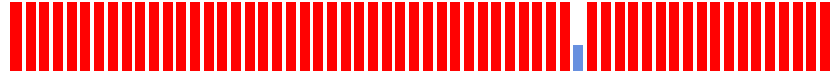

Majority

HYNNI TWYKDNKEI NI DDI KYSQTGKKLI I HNPELEDSESGRYXCYVHYDDVRI KNDI VVSR  
 190 200 210 220 230 240

|                    |                                                                         |     |
|--------------------|-------------------------------------------------------------------------|-----|
| ACAM2000_B19R.pro  | HYNNI TWYKDNKEI NI DDI KYSQTGKKLI I HNPELEDSESGRYDCYVHYDDVRI KNDI VVSR  | 240 |
| DFF9_B19R.pro      | HYNNI TWYKDNKEI NI DDI KYSQTGKKLI I HNPELEDSESGRYNICYVHYDDVRI KNDI VVSR | 240 |
| DFF10_B19R.pro     | HYNNI TWYKDNKEI NI DDI KYSQTGKKLI I HNPELEDSESGRYDCYVHYDDVRI KNDI VVSR  | 240 |
| DFF11_B19R.pro     | HYNNI TWYKDNKEI NI DDI KYSQTGKKLI I HNPELEDSESGRYDCYVHYDDVRI KNDI VVSR  | 240 |
| DFF12_B19R.pro     | HYNNI TWYKDNKEI NI DDI KYSQTGKKLI I HNPELEDSESGRYNICYVHYDDVRI KNDI VVSR | 240 |
| DFF13_B19R.pro     | HYNNI TWYKDNKEI NI DDI KYSQTGKKLI I HNPELEDSESGRYNICYVHYDDVRI KNDI VVSR | 240 |
| DFF15_B19R.pro     | HYNNI TWYKDNKEI NI DDI KYSQTGKKLI I HNPELEDSESGRYNICYVHYDDVRI KNDI VVSR | 240 |
| DFF16_B19R.pro     | HYNNI TWYKDNKEI NI DDI KYSQTGKKLI I HNPELEDSESGRYDCYVHYDDVRI KNDI VVSR  | 240 |
| DFF19_B19R.pro     | HYNNI TWYKDNKEI NI DDI KYSQTGKKLI I HNPELEDSESGRYNICYVHYDDVRI KNDI VVSR | 240 |
| DFF20_B19R.pro     | HYNNI TWYKDNKEI NI DDI KYSQTGKKLI I HNPELEDSESGRYDCYVHYDDVRI KNDI VVSR  | 240 |
| DFF21_B19R.pro     | HYNNI TWYKDNKEI NI DDI KYSQTGKKLI I HNPELEDSESGRYNICYVHYDDVRI KNDI VVSR | 240 |
| CL3_B19R.pro       | HYNNI TWYKDNKEI NI DDI KYSQTGKKLI I HNPELEDSESGRYDCYVHYDDVRI KNDI VVSR  | 240 |
| VACV-3737_B19R.pro | HYNNI TWYKDNKEI NI DDI KYSQTGKKLI I HNPELEDSESGRYDCYVHYDDVRI KNDI VVSR  | 240 |
| VACV-DUKE_B19R.pro | HYNNI TWYKDNKEI NI DDI KYSQTGKKLI I HNPELEDSESGRYNICYVHYDDVRI KNDI VVSR | 238 |

+ Majority

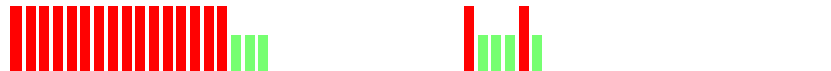

Majority

CKI LTVI PSQDHRFKLKRN-----CGYASN-----  
 250 260 270 280 290 300

|                    |                                                                        |     |
|--------------------|------------------------------------------------------------------------|-----|
| ACAM2000_B19R.pro  | CKI LTVI PSQDHRFKLKRN-----CGYASN-----                                  | 265 |
| DFF9_B19R.pro      | CKI LTVI PSQDHRFKLKRN-----CGYASN-----                                  | 265 |
| DFF10_B19R.pro     | CKI LTVI PSQDHRFKLKRN-----CGYASN-----                                  | 265 |
| DFF11_B19R.pro     | CKI LTVI PSQDHRFKLKRN-----CGYASN-----                                  | 265 |
| DFF12_B19R.pro     | CKI LTVI PSQDHRFKLKRN-----CGYASN-----                                  | 265 |
| DFF13_B19R.pro     | CKI LTVI PSQDHRFKLI LDPKI NVTI GEPANI TCTAVSTSLLI DDVLI EWENPSGWL I GF | 300 |
| DFF15_B19R.pro     | CKI LTVI PSQDHRFKLKRN-----CGYASN-----                                  | 265 |
| DFF16_B19R.pro     | CKI LTVI PSQDHRFKLKRN-----CGYASN-----                                  | 265 |
| DFF19_B19R.pro     | CKI LTVI PSQDHRFKLKRN-----CGYASN-----                                  | 265 |
| DFF20_B19R.pro     | CKI LTVI PSQDHRFKLKRN-----CGYASN-----                                  | 265 |
| DFF21_B19R.pro     | CKI LTVI PSQDHRFKLI LDPKI NVTI GEPANI TCTAVSTSLLI DDVLI EWENPSGWL I GF | 300 |
| CL3_B19R.pro       | CKI LTVI PSQDHRFKLI LDPKI NVTI GEPANI TCTAVSTSLLI DDVLI EWENPSGWL I GF | 300 |
| VACV-3737_B19R.pro | CKI LTVI PSQDHRFKLKRN-----CGYASN-----                                  | 265 |
| VACV-DUKE_B19R.pro | CKI LTVI PSQDHRFKLI LDPKI NVTI GEPANI TCTAVSTSLLI DDVLI EWENPSGWL I GF | 298 |

+ Majority

Majority

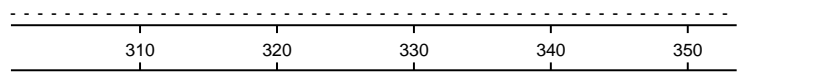

|                    |                                                          |     |
|--------------------|----------------------------------------------------------|-----|
| ACAM2000_B19R.pro  |                                                          | 265 |
| DFF9_B19R.pro      |                                                          | 265 |
| DFF10_B19R.pro     |                                                          | 265 |
| DFF11_B19R.pro     |                                                          | 265 |
| DFF12_B19R.pro     |                                                          | 265 |
| DFF13_B19R.pro     | DFDVYSLVTSRGGI TEATLYFENVTEEEYI GNTYKCRGHNYFEKLT TTTVVLE | 353 |
| DFF15_B19R.pro     |                                                          | 265 |
| DFF16_B19R.pro     |                                                          | 265 |
| DFF19_B19R.pro     |                                                          | 265 |
| DFF20_B19R.pro     |                                                          | 265 |
| DFF21_B19R.pro     | DFDVYSLVTSRGGI TEATLYFENVTEEEYI GNTYKCRGHNYFEKLT TTTVVLE | 353 |
| CL3_B19R.pro       | DFDVYSLVTSRGGI TEATLYFENVTEEEYI GNTYKCRGHNYFEKLT TTTVVLE | 353 |
| VACV-3737_B19R.pro |                                                          | 265 |
| VACV-DUKE_B19R.pro | DFDVYSLVTSRGGI TEATLYFENVTEEEYI GNTYKCRGHNYFEKLT TTTVVLE | 351 |

## F. C3L

+ Majority

Majority

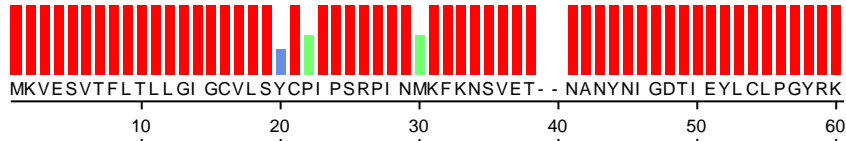

ACAM2000\_C3L.pro  
 DPP9\_C3L.pro  
 DPP10\_C3L.pro  
 DPP11\_C3L.pro  
 DPP12\_C3L.pro  
 DPP13\_C3L.pro  
 DPP15\_C3L.pro  
 DPP16\_C3L.pro  
 DPP17\_C3L.pro  
 DPP19\_C3L.pro  
 DPP20\_C3L.pro  
 DPP21\_C3L.pro  
 CL3\_C3L.pro  
 VACV-3737\_C3L.pro  
 VACV-DUKE\_C3L.pro

MKVESVTFLLTLLGI GCVLSCCPI PSRPI NMKFKNVETDANANYNI GDTI EYLCLPGYRK 60  
 MKVESVTFLLTLLGI GCVLSCCPI PSRPI NMKFKNVET - - NANYNI GDTI EYLCLPGYRK 58  
 MKVESVTFLLTLLGI GCVLSCCPI PSRPI NMKFKNVETDANANYNI GDTI EYLCLPGYRK 60  
 MKVESVTFLLTLLGI GCVLSCCPI PSRPI NI KFKNVET - - NANYNI GDTI EYLCLPGYRK 58  
 MKVESVTFLLTLLGI GCVLSCCPI PSRPI NI KFKNVET - - NANYNI GDTI EYLCLPGYRK 58  
 MKVESVTFLLTLLGI GCVLSCCPI PSRPI NMKFKNVET - - NANYNI GDTI EYLCLPGYRK 58  
 MKVESVTFLLTLLGI GCVLSCCPI PSRPI NMKFKNVETDANANYNI GDTI EYLCLPGYRK 60  
 MKVESVTFLLTLLGI GCVLSCCPI PSRPI NMKFKNVETDANANYNI GDTI EYLCLPGYRK 60  
 MKVESVTFLLTLLGI GCVLSCCPI PSRPI NI KFKNVET - - NANYNI GDTI EYLCLPGYRK 58  
 MKVESVTFLLTLLGI GCVLSCCPI PSRPI NMKFKNVET - - NANYNI GDTI EYLCLPGYRK 58  
 MKVESVTFLLTLLGI GCVLSCCPI PSRPI NMKFKNVETDANANYNI GDTI EYLCLPGYRK 60  
 MKVESVTFLLTLLGI GCVLSCCPI PSRPI NMKFKNVET - - NANYNI GDTI EYLCLPGYRK 58  
 MKVESVTFLLTLLGI GCVLSCCPI PSRPI NMKFKNVET - - NANYNI GDTI EYLCLPGYRK 58  
 MKVESVTFLLTLLGI GCVLSCCPI PSRPI NMKFKNVETDANANYNI GDTI EYLCLPGYRK 60

+ Majority

Majority

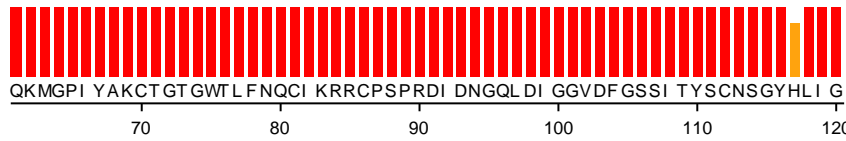

ACAM2000\_C3L.pro  
 DPP9\_C3L.pro  
 DPP10\_C3L.pro  
 DPP11\_C3L.pro  
 DPP12\_C3L.pro  
 DPP13\_C3L.pro  
 DPP15\_C3L.pro  
 DPP16\_C3L.pro  
 DPP17\_C3L.pro  
 DPP19\_C3L.pro  
 DPP20\_C3L.pro  
 DPP21\_C3L.pro  
 CL3\_C3L.pro  
 VACV-3737\_C3L.pro  
 VACV-DUKE\_C3L.pro

QKMGPI YAKCTGTGWL FNQCI KRRCPSPRDI DNGQLDI GGVDGSSI TYSCNSGYHLI G 120  
 QKMGPI YAKCTGTGWL FNQCI KRRCPSPRDI DNGQLDI GGVDGSSI TYSCNSGYHLI G 118  
 QKMGPI YAKCTGTGWL FNQCI KRRCPSPRDI DNGQLDI GGVDGSSI TYSCNSGYHLI G 120  
 QKMGPI YAKCTGTGWL FNQCI KRRCPSPRDI DNGQLDI GGVDGSSI TYSCNSGYHLI G 118  
 QKMGPI YAKCTGTGWL FNQCI KRRCPSPRDI DNGQLDI GGVDGSSI TYSCNSGYHLI G 118  
 QKMGPI YAKCTGTGWL FNQCI KRRCPSPRDI DNGQLDI GGVDGSSI TYSCNSGYHLI G 118  
 QKMGPI YAKCTGTGWL FNQCI KRRCPSPRDI DNGQLDI GGVDGSSI TYSCNSGYHLI G 120  
 QKMGPI YAKCTGTGWL FNQCI KRRCPSPRDI DNGQLDI GGVDGSSI TYSCNSGYHLI G 120  
 QKMGPI YAKCTGTGWL FNQCI KRRCPSPRDI DNGQLDI GGVDGSSI TYSCNSGYHLI G 118  
 QKMGPI YAKCTGTGWL FNQCI KRRCPSPRDI DNGQLDI GGVDGSSI TYSCNSGYHLI G 118  
 QKMGPI YAKCTGTGWL FNQCI KRRCPSPRDI DNGQLDI GGVDGSSI TYSCNSGYHLI G 120  
 QKMGPI YAKCTGTGWL FNQCI KRRCPSPRDI DNGQLDI GGVDGSSI TYSCNSGYHLI G 118  
 QKMGPI YAKCTGTGWL FNQCI KRRCPSPRDI DNGQLDI GGVDGSSI TYSCNSGYHLI G 118  
 QKMGPI YAKCTGTGWL FNQCI KRRCPSPRDI DNGQLDI GGVDGSSI TYSCNSGYHLI G 120  
 QKMGPI YAKCTGTGWL FNQCI KRRCPSPRDI DNGQLDI GGVDGSSI TYSCNSGYHLI G 118  
 QKMGPI YAKCTGTGWL FNQCI KRRCPSPRDI DNGQLDI GGVDGSSI TYSCNSGYHLI G 118

+ Majority

Majority

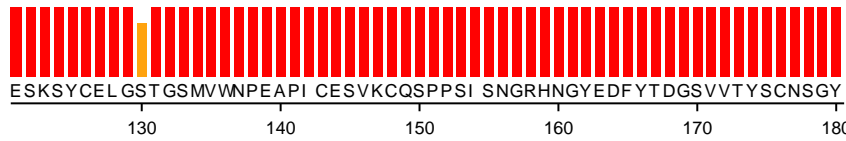

ACAM2000\_C3L.pro  
 DPP9\_C3L.pro  
 DPP10\_C3L.pro  
 DPP11\_C3L.pro  
 DPP12\_C3L.pro  
 DPP13\_C3L.pro  
 DPP15\_C3L.pro  
 DPP16\_C3L.pro  
 DPP17\_C3L.pro  
 DPP19\_C3L.pro  
 DPP20\_C3L.pro  
 DPP21\_C3L.pro  
 CL3\_C3L.pro  
 VACV-3737\_C3L.pro  
 VACV-DUKE\_C3L.pro

ESKSYCELGSTGSMVWNPEAPI CESVKCQSPPSI SNGRHNGYEDFYTDGSSVVTYSCNSGY 180  
 ESKSYCELGSTGSMVWNPEAPI CESVKCQSPPSI SNGRHNGYEDFYTDGSSVVTYSCNSGY 178  
 ESKSYCELGSTGSMVWNPEAPI CESVKCQSPPSI SNGRHNGYEDFYTDGSSVVTYSCNSGY 180  
 ESKSYCELGSTGSMVWNPEAPI CESVKCQSPPSI SNGRHNGYEDFYTDGSSVVTYSCNSGY 178  
 ESKSYCELGSTGSMVWNPEAPI CESVKCQSPPSI SNGRHNGYEDFYTDGSSVVTYSCNSGY 178  
 ESKSYCELGSTGSMVWNPEAPI CESVKCQSPPSI SNGRHNGYEDFYTDGSSVVTYSCNSGY 178  
 ESKSYCELGSTGSMVWNPEAPI CESVKCQSPPSI SNGRHNGYEDFYTDGSSVVTYSCNSGY 180  
 ESKSYCELGSTGSMVWNPEAPI CESVKCQSPPSI SNGRHNGYEDFYTDGSSVVTYSCNSGY 180  
 ESKSYCELGSTGSMVWNPEAPI CESVKCQSPPSI SNGRHNGYEDFYTDGSSVVTYSCNSGY 178  
 ESKSYCELGSTGSMVWNPEAPI CESVKCQSPPSI SNGRHNGYEDFYTDGSSVVTYSCNSGY 178  
 ESKSYCELGSTGSMVWNPEAPI CESVKCQSPPSI SNGRHNGYEDFYTDGSSVVTYSCNSGY 178  
 ESKSYCELGSTGSMVWNPEAPI CESVKCQSPPSI SNGRHNGYEDFYTDGSSVVTYSCNSGY 180  
 ESKSYCELGSTGSMVWNPEAPI CESVKCQSPPSI SNGRHNGYEDFYTDGSSVVTYSCNSGY 180  
 ESKSYCELGSTGSMVWNPEAPI CESVKCQSPPSI SNGRHNGYEDFYTDGSSVVTYSCNSGY 178  
 ESKSYCELGSTGSMVWNPEAPI CESVKCQSPPSI SNGRHNGYEDFYTDGSSVVTYSCNSGY 180

+ Majority

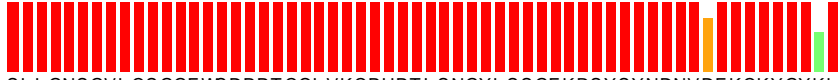

Majority

SLI GNSGVLCSGGEWSDPPTCQI VKCPHPTI SNGYLSSGFKRSYSYNDNVDFKCKYGYKL  
 190 200 210 220 230 240

|                   |                                                                 |     |
|-------------------|-----------------------------------------------------------------|-----|
| ACAM2000_C3L.pro  | SLI GNSGVLCSGGEWSDPPTCQI VKCPHPTI SNGYLSSGFKRSYSYNDNVDFKCKYGYKL | 240 |
| DPP9_C3L.pro      | SLI GNSGVLCSGGEWSDPPTCQI VKCPHPTI SNGYLSSGFKRSYSYNDNVDFKCKYGYKL | 238 |
| DPP10_C3L.pro     | SLI GNSGVLCSGGEWSDPPTCQI VKCPHPTI SNGYLSSGFKRSYSYNDNVDFKCKYGYNL | 240 |
| DPP11_C3L.pro     | SLI GNSGVLCSGGEWSDPPTCQI VKCPHPTI SNGYLSSGFKRSYSYNDNVDFKCKYGYKL | 238 |
| DPP12_C3L.pro     | SLI GNSGVLCSGGEWSDPPTCQI VKCPHPTI SNGYLSSGFKRSYSYNDNVDFKCKYGYKL | 238 |
| DPP13_C3L.pro     | SLI GNSGVLCSGGEWSDPPTCQI VKCPHPTI SNGYLSSGFKRSYSYNDNVDFKCKYGYNL | 238 |
| DPP15_C3L.pro     | SLI GNSGVLCSGGEWSDPPTCQI VKCPHPTI SNGYLSSGFKRSYSYNDNVDFKCKYGYKL | 238 |
| DPP16_C3L.pro     | SLI GNSGVLCSGGEWSDPPTCQI VKCPHPTI SNGYLSSGFKRSYSYNDNVDFKCKYGYKL | 240 |
| DPP17_C3L.pro     | SLI GNSGVLCSGGEWSDPPTCQI VKCPHPTI SNGYLSSGFKRSYSYNDNVDFKCKYGYNL | 240 |
| DPP19_C3L.pro     | SLI GNSGVLCSGGEWSDPPTCQI VKCPHPTI SNGYLSSGFKRSYSYNDNVDFKCKYGYNL | 238 |
| DPP20_C3L.pro     | SLI GNSGVLCSGGEWSDPPTCQI VKCPHPTI SNGYLSSGFKRSYSYNDNVDFKCKYGYKL | 238 |
| DPP21_C3L.pro     | SLI GNSGVLCSGGEWSDPPTCQI VKCPHPTI SNGYLSSGFKRSYSYNDNVDFKCKYGYKL | 240 |
| CL3_C3L.pro       | SLI GNSGVLCSGGEWSDPPTCQI VKCPHPTI SNGYLSSGFKRSYSYNDNVDFKCKYGYKL | 238 |
| VACV-3737_C3L.pro | SLI GNSGVLCSGGEWSDPPTCQI VKCPHPTI SNGYLSSGFKRSYSYNDNVDFKCKYGYKL | 238 |
| VACV-DUKE_C3L.pro | SLI GNSGVLCSGGEWSDPPTCQI VKCPHPTI SNGYLSSGFKRSYSYNDNVDFKCKYGYKL | 240 |

+ Majority

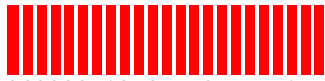

Majority

SGSSSSTCSPGNTWQPEL PKCVR  
 250 260

|                   |                          |     |
|-------------------|--------------------------|-----|
| ACAM2000_C3L.pro  | SGSSSSTCSPGNTWQPEL PKCVR | 263 |
| DPP9_C3L.pro      | SGSSSSTCSPGNTWQPEL PKCVR | 261 |
| DPP10_C3L.pro     | SGSSSSTCSPGNTWQPEL PKCVR | 263 |
| DPP11_C3L.pro     | SGSSSSTCSPGNTWQPEL PKCVR | 261 |
| DPP12_C3L.pro     | SGSSSSTCSPGNTWQPEL PKCVR | 261 |
| DPP13_C3L.pro     | SGSSSSTCSPGNTWQPEL PKCVR | 261 |
| DPP15_C3L.pro     | SGSSSSTCSPGNTWQPEL PKCVR | 261 |
| DPP16_C3L.pro     | SGSSSSTCSPGNTWQPEL PKCVR | 263 |
| DPP17_C3L.pro     | SGSSSSTCSPGNTWQPEL PKCVR | 263 |
| DPP19_C3L.pro     | SGSSSSTCSPGNTWQPEL PKCVR | 261 |
| DPP20_C3L.pro     | SGSSSSTCSPGNTWQPEL PKCVR | 261 |
| DPP21_C3L.pro     | SGSSSSTCSPGNTWQPEL PKCVR | 263 |
| CL3_C3L.pro       | SGSSSSTCSPGNTWQPEL PKCVR | 261 |
| VACV-3737_C3L.pro | SGSSSSTCSPGNTWQPEL PKCVR | 261 |
| VACV-DUKE_C3L.pro | SGSSSSTCSPGNTWQPEL PKCVR | 263 |



# G. D8L

+ Majority

Majority

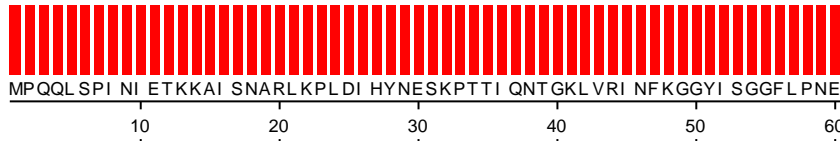

|                   |                                                                      |    |
|-------------------|----------------------------------------------------------------------|----|
| ACAM2000_D8L.pro  | MPQQLSPI N I ETKKAI SNARLKPLDI HYNESKPTTI QNTGKLVRI NFKGGYI SGGFLPNE | 60 |
| DPP9_D8L.pro      | MPQQLSPI N I ETKKAI SNARLKPLDI HYNESKPTTI QNTGKLVRI NFKGGYI SGGFLPNE | 60 |
| DPP10_D8L.pro     | MPQQLSPI N I ETKKAI SNARLKPLDI HYNESKPTTI QNTGKLVRI NFKGGYI SGGFLPNE | 60 |
| DPP11_D8L.pro     | MPQQLSPI N I ETKKAI SNARLKPLDI HYNESKPTTI QNTGKLVRI NFKGGYI SGGFLPNE | 60 |
| DPP12_D8L.pro     | MPQQLSPI N I ETKKAI SNARLKPLDI HYNESKPTTI QNTGKLVRI NFKGGYI SGGFLPNE | 60 |
| DPP13_D8L.pro     | MPQQLSPI N I ETKKAI SNARLKPLDI HYNESKPTTI QNTGKLVRI NFKGGYI SGGFLPNE | 60 |
| DPP15_D8L.pro     | MPQQLSPI N I ETKKAI SNARLKPLDI HYNESKPTTI QNTGKLVRI NFKGGYI SGGFLPNE | 60 |
| DPP16_D8L.pro     | MPQQLSPI N I ETKKAI SNARLKPLDI HYNESKPTTI QNTGKLVRI NFKGGYI SGGFLPNE | 60 |
| DPP17_D8L.pro     | MPQQLSPI N I ETKKAI SNARLKPLDI HYNESKPTTI QNTGKLVRI NFKGGYI SGGFLPNE | 60 |
| DPP19_D8L.pro     | MPQQLSPI N I ETKKAI SNARLKPLDI HYNESKPTTI QNTGKLVRI NFKGGYI SGGFLPNE | 60 |
| DPP20_D8L.pro     | MPQQLSPI N I ETKKAI SNARLKPLDI HYNESKPTTI QNTGKLVRI NFKGGYI SGGFLPNE | 60 |
| DPP21_D8L.pro     | MPQQLSPI N I ETKKAI SNARLKPLDI HYNESKPTTI QNTGKLVRI NFKGGYI SGGFLPNE | 60 |
| CL3_D8L.pro       | MPQQLSPI N I ETKKAI SNARLKPLDI HYNESKPTTI QNTGKLVRI NFKGGYI SGGFLPNE | 60 |
| VACV-3737_D8L.pro | MPQQLSPI N I ETKKAI SNARLKPLDI HYNESKPTTI QNTGKLVRI NFKGGYI SGGFLPNE | 60 |
| VACV-DUKE_D8L.pro | MPQQLSPI N I ETKKAI SNARLKPLDI HYNESKPTTI QNTGKLVRI NFKGGYI SGGFLPNE | 60 |

+ Majority

Majority

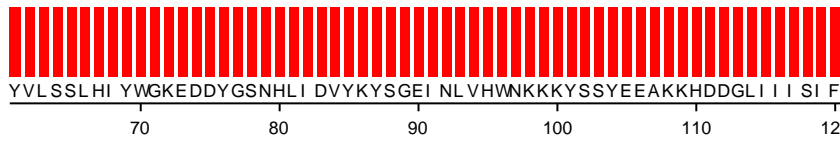

|                   |                                                                      |     |
|-------------------|----------------------------------------------------------------------|-----|
| ACAM2000_D8L.pro  | YVLSLHI YWGKEDDYGSNHLI D VYKYSGEI NLVHWNKKKYSSYEEAKKHDDGLI I I S I F | 120 |
| DPP9_D8L.pro      | YVLSLHI YWGKEDDYGSNHLI D VYKYSGEI NLVHWNKKKYSSYEEAKKHDDGLI I I S I F | 120 |
| DPP10_D8L.pro     | YVLSLHI YWGKEDDYGSNHLI D VYKYSGEI NLVHWNKKKYSSYEEAKKHDDGLI I I S I F | 120 |
| DPP11_D8L.pro     | YVLSLHI YWGKEDDYGSNHLI D VYKYSGEI NLVHWNKKKYSSYEEAKKHDDGLI I I S I F | 120 |
| DPP12_D8L.pro     | YVLSLHI YWGKEDDYGSNHLI D VYKYSGEI NLVHWNKKKYSSYEEAKKHDDGLI I I S I F | 120 |
| DPP13_D8L.pro     | YVLSLHI YWGKEDDYGSNHLI D VYKYSGEI NLVHWNKKKYSSYEEAKKHDDGLI I I S I F | 120 |
| DPP15_D8L.pro     | YVLSLHI YWGKEDDYGSNHLI D VYKYSGEI NLVHWNKKKYSSYEEAKKHDDGLI I I S I F | 120 |
| DPP16_D8L.pro     | YVLSLHI YWGKEDDYGSNHLI D VYKYSGEI NLVHWNKKKYSSYEEAKKHDDGLI I I S I F | 120 |
| DPP17_D8L.pro     | YVLSLHI YWGKEDDYGSNHLI D VYKYSGEI NLVHWNKKKYSSYEEAKKHDDGLI I I S I F | 120 |
| DPP19_D8L.pro     | YVLSLHI YWGKEDDYGSNHLI D VYKYSGEI NLVHWNKKKYSSYEEAKKHDDGLI I I S I F | 120 |
| DPP20_D8L.pro     | YVLSLHI YWGKEDDYGSNHLI D VYKYSGEI NLVHWNKKKYSSYEEAKKHDDGLI I I S I F | 120 |
| DPP21_D8L.pro     | YVLSLHI YWGKEDDYGSNHLI D VYKYSGEI NLVHWNKKKYSSYEEAKKHDDGLI I I S I F | 120 |
| CL3_D8L.pro       | YVLSLHI YWGKEDDYGSNHLI D VYKYSGEI NLVHWNKKKYSSYEEAKKHDDGLI I I S I F | 120 |
| VACV-3737_D8L.pro | YVLSLHI YWGKEDDYGSNHLI D VYKYSGEI NLVHWNKKKYSSYEEAKKHDDGLI I I S I F | 120 |
| VACV-DUKE_D8L.pro | YVLSLHI YWGKEDDYGSNHLI D VYKYSGEI NLVHWNKKKYSSYEEAKKHDDGLI I I S I F | 120 |

+ Majority

Majority

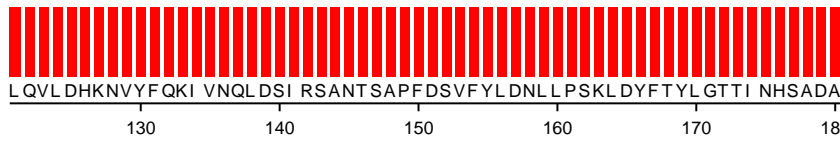

|                   |                                                                 |     |
|-------------------|-----------------------------------------------------------------|-----|
| ACAM2000_D8L.pro  | LQVLDHKNVYFQKI VNQLDSI RSANTSAPFDSVFYLDNLLPSKLDYFTYLGTTI NHSADA | 180 |
| DPP9_D8L.pro      | LQVLDHKNVYFQKI VNQLDSI RSANTSAPFDSVFYLDNLLPSKLDYFTYLGTTI NHSADA | 180 |
| DPP10_D8L.pro     | LQVLDHKNVYFQKI VNQLDSI RSANTSAPFDSVFYLDNLLPSKLDYFTYLGTTI NHSADA | 180 |
| DPP11_D8L.pro     | LQVLDHKNVYFQKI VNQLDSI RSANTSAPFDSVFYLDNLLPSKLDYFTYLGTTI NHSADA | 180 |
| DPP12_D8L.pro     | LQVLDHKNVYFQKI VNQLDSI RSANTSAPFDSVFYLDNLLPSKLDYFTYLGTTI NHSADA | 180 |
| DPP13_D8L.pro     | LQVLDHKNVYFQKI VNQLDSI RSANTSAPFDSVFYLDNLLPSKLDYFTYLGTTI NHSADA | 180 |
| DPP15_D8L.pro     | LQVLDHKNVYFQKI VNQLDSI RSANTSAPFDSVFYLDNLLPSKLDYFTYLGTTI NHSADA | 180 |
| DPP16_D8L.pro     | LQVLDHKNVYFQKI VNQLDSI RSANTSAPFDSVFYLDNLLPSKLDYFTYLGTTI NHSADA | 180 |
| DPP17_D8L.pro     | LQVLDHKNVYFQKI VNQLDSI RSANTSAPFDSVFYLDNLLPSKLDYFTYLGTTI NHSADA | 180 |
| DPP19_D8L.pro     | LQVLDHKNVYFQKI VNQLDSI RSANTSAPFDSVFYLDNLLPSKLDYFTYLGTTI NHSADA | 180 |
| DPP20_D8L.pro     | LQVLDHKNVYFQKI VNQLDSI RSANTSAPFDSVFYLDNLLPSKLDYFTYLGTTI NHSADA | 180 |
| DPP21_D8L.pro     | LQVLDHKNVYFQKI VNQLDSI RSANTSAPFDSVFYLDNLLPSKLDYFTYLGTTI NHSADA | 180 |
| CL3_D8L.pro       | LQVLDHKNVYFQKI VNQLDSI RSANTSAPFDSVFYLDNLLPSKLDYFTYLGTTI NHSADA | 180 |
| VACV-3737_D8L.pro | LQVLDHKNVYFQKI VNQLDSI RSANTSAPFDSVFYLDNLLPSKLDYFTYLGTTI NHSADA | 180 |
| VACV-DUKE_D8L.pro | LQVLDHKNVYFQKI VNQLDSI RSANTSAPFDSVFYLDNLLPSKLDYFTYLGTTI NHSADA | 180 |







+ Majority

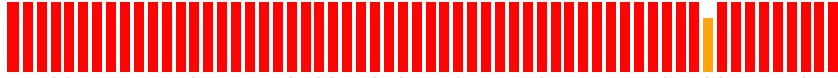

Majority

KTLSSYI DFENTKSDI DVI KSI SSI FGYSNENCNTI VFGI YKDNLLL SI NSSFYFNDSSL  
 370 380 390 400 410 420

|                   |                                                                       |     |
|-------------------|-----------------------------------------------------------------------|-----|
| ACAM2000_G5R.pro  | KTLSSYI DFENTKSDI DVI KSI SSI FGYSNENCNTI VFGI YKDNLLL SI NSSFYFNDSSL | 420 |
| DPP9_G5R.pro      | KTLSSYI DFENTKSDI DVI KSI SSI FGYSNENCNTI VFGI YKDNLLL SI NSSFYFNDSSL | 420 |
| DPP10_G5R.pro     | KTLSSYI DFENTKSDI DVI KSI SSI FGYSNENCNTI VFGI YKDNLLL SI NSSFYFNDSSL | 420 |
| DPP11_G5R.pro     | KTLSSYI DFENTKSDI DVI KSI SSI FGYSNENCNTI VFGI YKDNLLL SI NSSFYFNDSSL | 420 |
| DPP12_G5R.pro     | KTLSSYI DFENTKSDI DVI KSI SSI FGYSNENCNTI VFGI YKDNLLL SI NSSFYFNDSSL | 420 |
| DPP13_G5R.pro     | KTLSSYI DFENTKSDI DVI KSI SSI FGYSNENCNTI VFGI YKDNLLL SI NSSFYFNDSSL | 420 |
| DPP15_G5R.pro     | KTLSSYI DFENTKSDI DVI KSI SSI FGYSNENCNTI VFGI YKDNLLL SI NSSFYFNDSSL | 420 |
| DPP16_G5R.pro     | KTLSSYI DFENTKSDI DVI KSI SSI FGYSNENCNTI VFGI YKDNLLL SI NSSFYFNDSSL | 420 |
| DPP17_G5R.pro     | KTLSSYI DFENTKSDI DVI KSI SSI FGYSNENCNTI VFGI YKDNLLL SI NSSFYFNDSSL | 420 |
| DPP19_G5R.pro     | KTLSSYI DFENTKSDI DVI KSI SSI FGYSNENCNTI VFGI YKDNLLL SI NSSFYFNDSSL | 420 |
| DPP20_G5R.pro     | KTLSSYI DFENTKSDI DVI KSI SSI FGYSNENCNTI VFGI YKDNLLL SI NSSFYFNDSSL | 420 |
| DPP21_G5R.pro     | KTLSSYI DFENTKSDI DVI KSI SSI FGYSNENCNTI VFGI YKDNLLL SI NSSFYFNDSSL | 420 |
| CL3_G5R.pro       | KTLSSYI DFENTKSDI DVI KSI SSI FGYSNENCNTI VFGI YKDNLLL SI NSSFYFNDSSL | 420 |
| VACV-3737_G5R.pro | KTLSSYI DFENTKSDI DVI KSI SSI FGYSNENCNTI VFGI YKDNLLL SI NSSFYFNDSSL | 420 |
| VACV-DUKE_G5R.pro | KTLSSYI DFENTKSDI DVI KSI SSI FGYSNENCNTI VFGI YKDNLLL SI NSSFYFNDSSL | 420 |

+ Majority

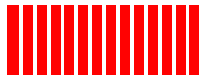

Majority

I TNTKSDNI I NI GY  
 430

|                   |                    |     |
|-------------------|--------------------|-----|
| ACAM2000_G5R.pro  | I TNTKSDNI I NI GY | 434 |
| DPP9_G5R.pro      | I TNTKSDNI I NI GY | 434 |
| DPP10_G5R.pro     | I TNTKSDNI I NI GY | 434 |
| DPP11_G5R.pro     | I TNTKSDNI I NI GY | 434 |
| DPP12_G5R.pro     | I TNTKSDNI I NI GY | 434 |
| DPP13_G5R.pro     | I TNTKSDNI I NI GY | 434 |
| DPP15_G5R.pro     | I TNTKSDNI I NI GY | 434 |
| DPP16_G5R.pro     | I TNTKSDNI I NI GY | 434 |
| DPP17_G5R.pro     | I TNTKSDNI I NI GY | 434 |
| DPP19_G5R.pro     | I TNTKSDNI I NI GY | 434 |
| DPP20_G5R.pro     | I TNTKSDNI I NI GY | 434 |
| DPP21_G5R.pro     | I TNTKSDNI I NI GY | 434 |
| CL3_G5R.pro       | I TNTKSDNI I NI GY | 434 |
| VACV-3737_G5R.pro | I TNTKSDNI I NI GY | 434 |
| VACV-DUKE_G5R.pro | I TNTKSDNI I NI GY | 434 |

# I. IIL

+ Majority

Majority

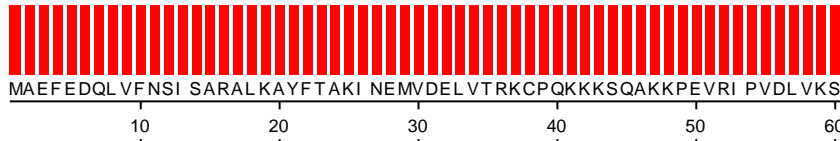

|                   |                                                                 |    |
|-------------------|-----------------------------------------------------------------|----|
| ACAM2000_f1L.pro  | MAEFEDQLVFNSI SARALKAYFTAKI NEMVDELVTRKCPQKKKSQAKKPEVRI PVDLVKS | 60 |
| DPP9_f1L.pro      | MAEFEDQLVFNSI SARALKAYFTAKI NEMVDELVTRKCPQKKKSQAKKPEVRI PVDLVKS | 60 |
| DPP10_f1L.pro     | MAEFEDQLVFNSI SARALKAYFTAKI NEMVDELVTRKCPQKKKSQAKKPEVRI PVDLVKS | 60 |
| DPP11_f1L.pro     | MAEFEDQLVFNSI SARALKAYFTAKI NEMVDELVTRKCPQKKKSQAKKPEVRI PVDLVKS | 60 |
| DPP12_f1L.pro     | MAEFEDQLVFNSI SARALKAYFTAKI NEMVDELVTRKCPQKKKSQAKKPEVRI PVDLVKS | 60 |
| DPP13_f1L.pro     | MAEFEDQLVFNSI SARALKAYFTAKI NEMVDELVTRKCPQKKKSQAKKPEVRI PVDLVKS | 60 |
| DPP15_f1L.pro     | MAEFEDQLVFNSI SARALKAYFTAKI NEMVDELVTRKCPQKKKSQAKKPEVRI PVDLVKS | 60 |
| DPP16_f1L.pro     | MAEFEDQLVFNSI SARALKAYFTAKI NEMVDELVTRKCPQKKKSQAKKPEVRI PVDLVKS | 60 |
| DPP17_f1L.pro     | MAEFEDQLVFNSI SARALKAYFTAKI NEMVDELVTRKCPQKKKSQAKKPEVRI PVDLVKS | 60 |
| DPP19_f1L.pro     | MAEFEDQLVFNSI SARALKAYFTAKI NEMVDELVTRKCPQKKKSQAKKPEVRI PVDLVKS | 60 |
| DPP20_f1L.pro     | MAEFEDQLVFNSI SARALKAYFTAKI NEMVDELVTRKCPQKKKSQAKKPEVRI PVDLVKS | 60 |
| DPP21_f1L.pro     | MAEFEDQLVFNSI SARALKAYFTAKI NEMVDELVTRKCPQKKKSQAKKPEVRI PVDLVKS | 60 |
| CL3_f1L.pro       | MAEFEDQLVFNSI SARALKAYFTAKI NEMVDELVTRKCPQKKKSQAKKPEVRI PVDLVKS | 60 |
| VACV-3737_f1L.pro | MAEFEDQLVFNSI SARALKAYFTAKI NEMVDELVTRKCPQKKKSQAKKPEVRI PVDLVKS | 60 |
| VACV-DUKE_f1L.pro | MAEFEDQLVFNSI SARALKAYFTAKI NEMVDELVTRKCPQKKKSQAKKPEVRI PVDLVKS | 60 |

+ Majority

Majority

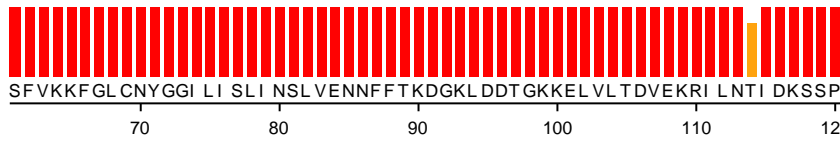

|                   |                                                                         |     |
|-------------------|-------------------------------------------------------------------------|-----|
| ACAM2000_f1L.pro  | SFVKKFGLCNYGGI LI SLI NSL VENNFFT KDGKLD DDTGKKE LVL TDVEKRI LNAI DKSSP | 120 |
| DPP9_f1L.pro      | SFVKKFGLCNYGGI LI SLI NSL VENNFFT KDGKLD DDTGKKE LVL TDVEKRI LNTI DKSSP | 120 |
| DPP10_f1L.pro     | SFVKKFGLCNYGGI LI SLI NSL VENNFFT KDGKLD DDTGKKE LVL TDVEKRI LNTI DKSSP | 120 |
| DPP11_f1L.pro     | SFVKKFGLCNYGGI LI SLI NSL VENNFFT KDGKLD DDTGKKE LVL TDVEKRI LNTI DKSSP | 120 |
| DPP12_f1L.pro     | SFVKKFGLCNYGGI LI SLI NSL VENNFFT KDGKLD DDTGKKE LVL TDVEKRI LNTI DKSSP | 120 |
| DPP13_f1L.pro     | SFVKKFGLCNYGGI LI SLI NSL VENNFFT KDGKLD DDTGKKE LVL TDVEKRI LNTI DKSSP | 120 |
| DPP15_f1L.pro     | SFVKKFGLCNYGGI LI SLI NSL VENNFFT KDGKLD DDTGKKE LVL TDVEKRI LNTI DKSSP | 120 |
| DPP16_f1L.pro     | SFVKKFGLCNYGGI LI SLI NSL VENNFFT KDGKLD DDTGKKE LVL TDVEKRI LNTI DKSSP | 120 |
| DPP17_f1L.pro     | SFVKKFGLCNYGGI LI SLI NSL VENNFFT KDGKLD DDTGKKE LVL TDVEKRI LNTI DKSSP | 120 |
| DPP19_f1L.pro     | SFVKKFGLCNYGGI LI SLI NSL VENNFFT KDGKLD DDTGKKE LVL TDVEKRI LNTI DKSSP | 120 |
| DPP20_f1L.pro     | SFVKKFGLCNYGGI LI SLI NSL VENNFFT KDGKLD DDTGKKE LVL TDVEKRI LNTI DKSSP | 120 |
| DPP21_f1L.pro     | SFVKKFGLCNYGGI LI SLI NSL VENNFFT KDGKLD DDTGKKE LVL TDVEKRI LNTI DKSSP | 120 |
| CL3_f1L.pro       | SFVKKFGLCNYGGI LI SLI NSL VENNFFT KDGKLD DDTGKKE LVL TDVEKRI LNAI DKSSP | 120 |
| VACV-3737_f1L.pro | SFVKKFGLCNYGGI LI SLI NSL VENNFFT KDGKLD DDTGKKE LVL TDVEKRI LNTI DKSSP | 120 |
| VACV-DUKE_f1L.pro | SFVKKFGLCNYGGI LI SLI NSL VENNFFT KDGKLD DDTGKKE LVL TDVEKRI LNTI DKSSP | 120 |

+ Majority

Majority

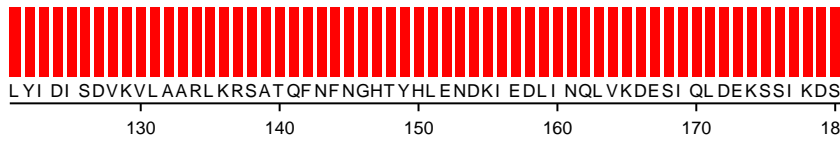

|                   |                                                                    |     |
|-------------------|--------------------------------------------------------------------|-----|
| ACAM2000_f1L.pro  | LYI DI SDVKVL AARLKRSATQFNFGHTYHLENDKI EDLI NQLVKDESI QLDEKSSI KDS | 180 |
| DPP9_f1L.pro      | LYI DI SDVKVL AARLKRSATQFNFGHTYHLENDKI EDLI NQLVKDESI QLDEKSSI KDS | 180 |
| DPP10_f1L.pro     | LYI DI SDVKVL AARLKRSATQFNFGHTYHLENDKI EDLI NQLVKDESI QLDEKSSI KDS | 180 |
| DPP11_f1L.pro     | LYI DI SDVKVL AARLKRSATQFNFGHTYHLENDKI EDLI NQLVKDESI QLDEKSSI KDS | 180 |
| DPP12_f1L.pro     | LYI DI SDVKVL AARLKRSATQFNFGHTYHLENDKI EDLI NQLVKDESI QLDEKSSI KDS | 180 |
| DPP13_f1L.pro     | LYI DI SDVKVL AARLKRSATQFNFGHTYHLENDKI EDLI NQLVKDESI QLDEKSSI KDS | 180 |
| DPP15_f1L.pro     | LYI DI SDVKVL AARLKRSATQFNFGHTYHLENDKI EDLI NQLVKDESI QLDEKSSI KDS | 180 |
| DPP16_f1L.pro     | LYI DI SDVKVL AARLKRSATQFNFGHTYHLENDKI EDLI NQLVKDESI QLDEKSSI KDS | 180 |
| DPP17_f1L.pro     | LYI DI SDVKVL AARLKRSATQFNFGHTYHLENDKI EDLI NQLVKDESI QLDEKSSI KDS | 180 |
| DPP19_f1L.pro     | LYI DI SDVKVL AARLKRSATQFNFGHTYHLENDKI EDLI NQLVKDESI QLDEKSSI KDS | 180 |
| DPP20_f1L.pro     | LYI DI SDVKVL AARLKRSATQFNFGHTYHLENDKI EDLI NQLVKDESI QLDEKSSI KDS | 180 |
| DPP21_f1L.pro     | LYI DI SDVKVL AARLKRSATQFNFGHTYHLENDKI EDLI NQLVKDESI QLDEKSSI KDS | 180 |
| CL3_f1L.pro       | LYI DI SDVKVL AARLKRSATQFNFGHTYHLENDKI EDLI NQLVKDESI QLDEKSSI KDS | 180 |
| VACV-3737_f1L.pro | LYI DI SDVKVL AARLKRSATQFNFGHTYHLENDKI EDLI NQLVKDESI QLDEKSSI KDS | 180 |
| VACV-DUKE_f1L.pro | LYI DI SDVKVL AARLKRSATQFNFGHTYHLENDKI EDLI NQLVKDESI QLDEKSSI KDS | 180 |

+ Majority

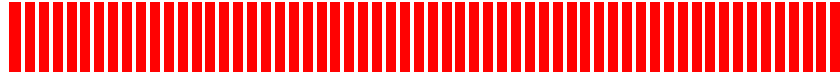

Majority

MYVI PDELI DVLKTRLF RSPQVKDNI I SRTRL YDYFTRVTKRDESSI YVI LKDPRI ASI L  
 190 200 210 220 230 240

|                   |                                                                        |     |
|-------------------|------------------------------------------------------------------------|-----|
| ACAM2000_f1L.pro  | MYVI PDELI DVLKTRLF RSPQVKDNI I SRTRL YDYFTRVTKRDESSI YVI LKDPRI ASI L | 240 |
| DPP9_f1L.pro      | MYVI PDELI DVLKTRLF RSPQVKDNI I SRTRL YDYFTRVTKRDESSI YVI LKDPRI ASI L | 240 |
| DPP10_f1L.pro     | MYVI PDELI DVLKTRLF RSPQVKDNI I SRTRL YDYFTRVTKRDESSI YVI LKDPRI ASI L | 240 |
| DPP11_f1L.pro     | MYVI PDELI DVLKTRLF RSPQVKDNI I SRTRL YDYFTRVTKRDESSI YVI LKDPRI ASI L | 240 |
| DPP12_f1L.pro     | MYVI PDELI DVLKTRLF RSPQVKDNI I SRTRL YDYFTRVTKRDESSI YVI LKDPRI ASI L | 240 |
| DPP13_f1L.pro     | MYVI PDELI DVLKTRLF RSPQVKDNI I SRTRL YDYFTRVTKRDESSI YVI LKDPRI ASI L | 240 |
| DPP15_f1L.pro     | MYVI PDELI DVLKTRLF RSPQVKDNI I SRTRL YDYFTRVTKRDESSI YVI LKDPRI ASI L | 240 |
| DPP16_f1L.pro     | MYVI PDELI DVLKTRLF RSPQVKDNI I SRTRL YDYFTRVTKRDESSI YVI LKDPRI ASI L | 240 |
| DPP17_f1L.pro     | MYVI PDELI DVLKTRLF RSPQVKDNI I SRTRL YDYFTRVTKRDESSI YVI LKDPRI ASI L | 240 |
| DPP19_f1L.pro     | MYVI PDELI DVLKTRLF RSPQVKDNI I SRTRL YDYFTRVTKRDESSI YVI LKDPRI ASI L | 240 |
| DPP20_f1L.pro     | MYVI PDELI DVLKTRLF RSPQVKDNI I SRTRL YDYFTRVTKRDESSI YVI LKDPRI ASI L | 240 |
| DPP21_f1L.pro     | MYVI PDELI DVLKTRLF RSPQVKDNI I SRTRL YDYFTRVTKRDESSI YVI LKDPRI ASI L | 240 |
| CL3_f1L.pro       | MYVI PDELI DVLKTRLF RSPQVKDNI I SRTRL YDYFTRVTKRDESSI YVI LKDPRI ASI L | 240 |
| VACV-3737_f1L.pro | MYVI PDELI DVLKTRLF RSPQVKDNI I SRTRL YDYFTRVTKRDESSI YVI LKDPRI ASI L | 240 |
| VACV-DUKE_f1L.pro | MYVI PDELI DVLKTRLF RSPQVKDNI I SRTRL YDYFTRVTKRDESSI YVI LKDPRI ASI L | 240 |

+ Majority

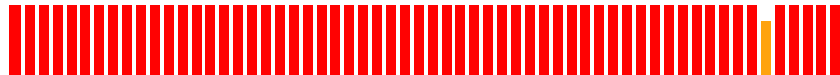

Majority

SLETVKMGAFMYTKHSMLTNAI SSRVDRYSKKFQESFYEDI AEFVKENERVNVSRVVECL  
 250 260 270 280 290 300

|                   |                                                                |     |
|-------------------|----------------------------------------------------------------|-----|
| ACAM2000_f1L.pro  | SLETVKMGAFMYTKHSMLTNAI SSRVDRYSKKFQESFYEDI AEFVKENERVNVSRVVECL | 300 |
| DPP9_f1L.pro      | SLETVKMGAFMYTKHSMLTNAI SSRVDRYSKKFQESFYEDI AEFVKENERVNVSRVVECL | 300 |
| DPP10_f1L.pro     | SLETVKMGAFMYTKHSMLTNAI SSRVDRYSKKFQESFYEDI AEFVKENERVNVSRVVECL | 300 |
| DPP11_f1L.pro     | SLETVKMGAFMYTKHSMLTNAI SSRVDRYSKKFQESFYEDI AEFVKENERVNVSRVVECL | 300 |
| DPP12_f1L.pro     | SLETVKMGAFMYTKHSMLTNAI SSRVDRYSKKFQESFYEDI AEFVKENERVNVSRVVECL | 300 |
| DPP13_f1L.pro     | SLETVKMGAFMYTKHSMLTNAI SSRVDRYSKKFQESFYEDI AEFVKENERVNVSRVVECL | 300 |
| DPP15_f1L.pro     | SLETVKMGAFMYTKHSMLTNAI SSRVDRYSKKFQESFYEDI AEFVKENERVNVSRVVECL | 300 |
| DPP16_f1L.pro     | SLETVKMGAFMYTKHSMLTNAI SSRVDRYSKKFQESFYEDI AEFVKENERVNVSRVVECL | 300 |
| DPP17_f1L.pro     | SLETVKMGAFMYTKHSMLTNAI SSRVDRYSKKFQESFYEDI AEFVKENERVNVSRVVECL | 300 |
| DPP19_f1L.pro     | SLETVKMGAFMYTKHSMLTNAI SSRVDRYSKKFQESFYEDI AEFVKENERVNVSRVVECL | 300 |
| DPP20_f1L.pro     | SLETVKMGAFMYTKHSMLTNAI SSRVDRYSKKFQESFYEDI AEFVKENERVNVSRVVECL | 300 |
| DPP21_f1L.pro     | SLETVKMGAFMYTKHSMLTNAI SSRVDRYSKKFQESFYEDI AEFVKENERVNVSRVVECL | 300 |
| CL3_f1L.pro       | SLETVKMGAFMYTKHSMLTNAI SSRVDRYSKKFQESFYEDI AEFVKENERVNVSRVVECL | 300 |
| VACV-3737_f1L.pro | SLETVKMGAFMYTKHSMLTNAI SSRVDRYSKKFQESFYEDI AEFVKENERVNVSRVVECL | 300 |
| VACV-DUKE_f1L.pro | SLETVKMGAFMYTKHSMLTNAI SSRVDRYSKKFQESFYEDI AEFVKENERVNVSRVVECL | 300 |

+ Majority

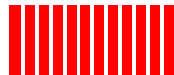

Majority

TVPNI TI SSNAE  
 310

|                   |                |     |
|-------------------|----------------|-----|
| ACAM2000_f1L.pro  | TVPNI TI SSNAE | 312 |
| DPP9_f1L.pro      | TVPNI TI SSNAE | 312 |
| DPP10_f1L.pro     | TVPNI TI SSNAE | 312 |
| DPP11_f1L.pro     | TVPNI TI SSNAE | 312 |
| DPP12_f1L.pro     | TVPNI TI SSNAE | 312 |
| DPP13_f1L.pro     | TVPNI TI SSNAE | 312 |
| DPP15_f1L.pro     | TVPNI TI SSNAE | 312 |
| DPP16_f1L.pro     | TVPNI TI SSNAE | 312 |
| DPP17_f1L.pro     | TVPNI TI SSNAE | 312 |
| DPP19_f1L.pro     | TVPNI TI SSNAE | 312 |
| DPP20_f1L.pro     | TVPNI TI SSNAE | 312 |
| DPP21_f1L.pro     | TVPNI TI SSNAE | 312 |
| CL3_f1L.pro       | TVPNI TI SSNAE | 312 |
| VACV-3737_f1L.pro | TVPNI TI SSNAE | 312 |
| VACV-DUKE_f1L.pro | TVPNI TI SSNAE | 312 |



## J. I3L

+ Majority

Majority

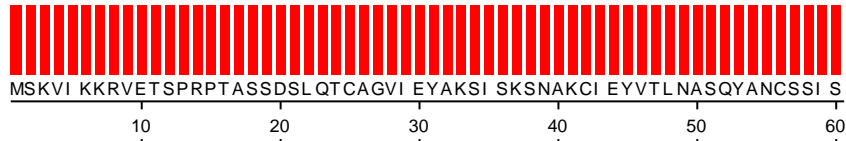

|                   |                                                                   |    |
|-------------------|-------------------------------------------------------------------|----|
| ACAM2000_BL.pro   | MSKVI KKRVETSPRPTASSDSLQTCAGVI EYAKSI SKSNAKCI EYVTLNASQYANCSSI S | 60 |
| DPP9_BL.pro       | MSKVI KKRVETSPRPTASSDSLQTCAGVI EYAKSI SKSNAKCI EYVTLNASQYANCSSI S | 60 |
| DPP10_BL.pro      | MSKVI KKRVETSPRPTASSDSLQTCAGVI EYAKSI SKSNAKCI EYVTLNASQYANCSSI S | 60 |
| DPP11_BL.pro      | MSKVI KKRVETSPRPTASSDSLQTCAGVI EYAKSI SKSNAKCI EYVTLNASQYANCSSI S | 60 |
| DPP12_BL.pro      | MSKVI KKRVETSPRPTASSDSLQTCAGVI EYAKSI SKSNAKCI EYVTLNASQYANCSSI S | 60 |
| DPP13_BL.pro      | MSKVI KKRVETSPRPTASSDSLQTCAGVI EYAKSI SKSNAKCI EYVTLNASQYANCSSI S | 60 |
| DPP15_BL.pro      | MSKVI KKRVETSPRPTASSDSLQTCAGVI EYAKSI SKSNAKCI EYVTLNASQYANCSSI S | 60 |
| DPP16_BL.pro      | MSKVI KKRVETSPRPTASSDSLQTCAGVI EYAKSI SKSNAKCI EYVTLNASQYANCSSI S | 60 |
| DPP17_BL.pro      | MSKVI KKRVETSPRPTASSDSLQTCAGVI EYAKSI SKSNAKCI EYVTLNASQYANCSSI S | 60 |
| DPP19_BL.pro      | MSKVI KKRVETSPRPTASSDSLQTCAGVI EYAKSI SKSNAKCI EYVTLNASQYANCSSI S | 60 |
| DPP20_BL.pro      | MSKVI KKRVETSPRPTASSDSLQTCAGVI EYAKSI SKSNAKCI EYVTLNASQYANCSSI S | 60 |
| DPP21_BL.pro      | MSKVI KKRVETSPRPTASSDSLQTCAGVI EYAKSI SKSNAKCI EYVTLNASQYANCSSI S | 60 |
| CL3_I3L.pro       | MSKVI KKRVETSPRPTASSDSLQTCAGVI EYAKSI SKSNAKCI EYVTLNASQYANCSSI S | 60 |
| VACV-3737_I3L.pro | MSKVI KKRVETSPRPTASSDSLQTCAGVI EYAKSI SKSNAKCI EYVTLNASQYANCSSI S | 60 |
| VACV-DUKE_I3L.pro | MSKVI KKRVETSPRPTASSDSLQTCAGVI EYAKSI SKSNAKCI EYVTLNASQYANCSSI S | 60 |

+ Majority

Majority

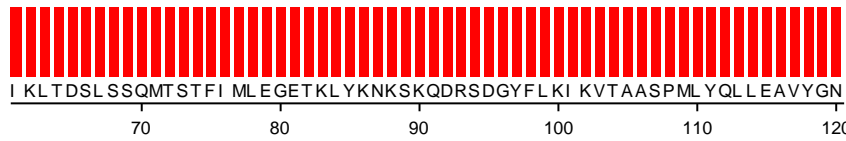

|                   |                                                                  |     |
|-------------------|------------------------------------------------------------------|-----|
| ACAM2000_BL.pro   | I KLTDSLSSQMTSTFI MLEGETKLYKNKSKQDRSDGYFLKI KVT AASPMLYQLLEAVYGN | 120 |
| DPP9_BL.pro       | I KLTDSLSSQMTSTFI MLEGETKLYKNKSKQDRSDGYFLKI KVT AASPMLYQLLEAVYGN | 120 |
| DPP10_BL.pro      | I KLTDSLSSQMTSTFI MLEGETKLYKNKSKQDRSDGYFLKI KVT AASPMLYQLLEAVYGN | 120 |
| DPP11_BL.pro      | I KLTDSLSSQMTSTFI MLEGETKLYKNKSKQDRSDGYFLKI KVT AASPMLYQLLEAVYGN | 120 |
| DPP12_BL.pro      | I KLTDSLSSQMTSTFI MLEGETKLYKNKSKQDRSDGYFLKI KVT AASPMLYQLLEAVYGN | 120 |
| DPP13_BL.pro      | I KLTDSLSSQMTSTFI MLEGETKLYKNKSKQDRSDGYFLKI KVT AASPMLYQLLEAVYGN | 120 |
| DPP15_BL.pro      | I KLTDSLSSQMTSTFI MLEGETKLYKNKSKQDRSDGYFLKI KVT AASPMLYQLLEAVYGN | 120 |
| DPP16_BL.pro      | I KLTDSLSSQMTSTFI MLEGETKLYKNKSKQDRSDGYFLKI KVT AASPMLYQLLEAVYGN | 120 |
| DPP17_BL.pro      | I KLTDSLSSQMTSTFI MLEGETKLYKNKSKQDRSDGYFLKI KVT AASPMLYQLLEAVYGN | 120 |
| DPP19_BL.pro      | I KLTDSLSSQMTSTFI MLEGETKLYKNKSKQDRSDGYFLKI KVT AASPMLYQLLEAVYGN | 120 |
| DPP20_BL.pro      | I KLTDSLSSQMTSTFI MLEGETKLYKNKSKQDRSDGYFLKI KVT AASPMLYQLLEAVYGN | 120 |
| DPP21_BL.pro      | I KLTDSLSSQMTSTFI MLEGETKLYKNKSKQDRSDGYFLKI KVT AASPMLYQLLEAVYGN | 120 |
| CL3_I3L.pro       | I KLTDSLSSQMTSTFI MLEGETKLYKNKSKQDRSDGYFLKI KVT AASPMLYQLLEAVYGN | 120 |
| VACV-3737_I3L.pro | I KLTDSLSSQMTSTFI MLEGETKLYKNKSKQDRSDGYFLKI KVT AASPMLYQLLEAVYGN | 120 |
| VACV-DUKE_I3L.pro | I KLTDSLSSQMTSTFI MLEGETKLYKNKSKQDRSDGYFLKI KVT AASPMLYQLLEAVYGN | 120 |

+ Majority

Majority

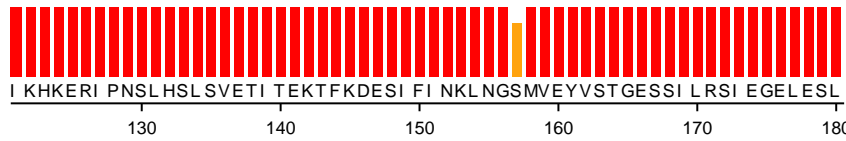

|                   |                                                                    |     |
|-------------------|--------------------------------------------------------------------|-----|
| ACAM2000_BL.pro   | I KHKERI PNSLHSLSVETI TEKTFKDESI FINKLNGSMVEYVSTGESSI LRSI EGELESL | 180 |
| DPP9_BL.pro       | I KHKERI PNSLHSLSVETI TEKTFKDESI FINKLNGAMVEYVSTGESSI LRSI EGELESL | 180 |
| DPP10_BL.pro      | I KHKERI PNSLHSLSVETI TEKTFKDESI FINKLNGSMVEYVSTGESSI LRSI EGELESL | 180 |
| DPP11_BL.pro      | I KHKERI PNSLHSLSVETI TEKTFKDESI FINKLNGSMVEYVSTGESSI LRSI EGELESL | 180 |
| DPP12_BL.pro      | I KHKERI PNSLHSLSVETI TEKTFKDESI FINKLNGAMVEYVSTGESSI LRSI EGELESL | 180 |
| DPP13_BL.pro      | I KHKERI PNSLHSLSVETI TEKTFKDESI FINKLNGSMVEYVSTGESSI LRSI EGELESL | 180 |
| DPP15_BL.pro      | I KHKERI PNSLHSLSVETI TEKTFKDESI FINKLNGSMVEYVSTGESSI LRSI EGELESL | 180 |
| DPP16_BL.pro      | I KHKERI PNSLHSLSVETI TEKTFKDESI FINKLNGSMVEYVSTGESSI LRSI EGELESL | 180 |
| DPP17_BL.pro      | I KHKERI PNSLHSLSVETI TEKTFKDESI FINKLNGSMVEYVSTGESSI LRSI EGELESL | 180 |
| DPP19_BL.pro      | I KHKERI PNSLHSLSVETI TEKTFKDESI FINKLNGSMVEYVSTGESSI LRSI EGELESL | 180 |
| DPP20_BL.pro      | I KHKERI PNSLHSLSVETI TEKTFKDESI FINKLNGSMVEYVSTGESSI LRSI EGELESL | 180 |
| DPP21_BL.pro      | I KHKERI PNSLHSLSVETI TEKTFKDESI FINKLNGSMVEYVSTGESSI LRSI EGELESL | 180 |
| CL3_I3L.pro       | I KHKERI PNSLHSLSVETI TEKTFKDESI FINKLNGSMVEYVSTGESSI LRSI EGELESL | 180 |
| VACV-3737_I3L.pro | I KHKERI PNSLHSLSVETI TEKTFKDESI FINKLNGSMVEYVSTGESSI LRSI EGELESL | 180 |
| VACV-DUKE_I3L.pro | I KHKERI PNSLHSLSVETI TEKTFKDESI FINKLNGSMVEYVSTGESSI LRSI EGELESL | 180 |

+ Majority

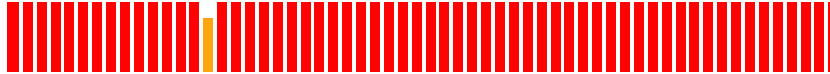

Majority

SKRERQLAKAI I TPVVFYRSGTETKI TFALKKLI I DREVVANVI GLSGDSERVSMTENVE  
 190 200 210 220 230 240

|                   |                                                                    |     |
|-------------------|--------------------------------------------------------------------|-----|
| ACAM2000_BL.pro   | SKRERQLAKAI I TPVVFYRSGTETKI TFALKKLI I DREVVANVI GLSGDSERVSMTENVE | 240 |
| DPP9_BL.pro       | SKRERQLAKAI I TPVVFYRSGTETKI TFALKKLI I DREVVANVI GLSGDSERVSMTENVE | 240 |
| DPP10_BL.pro      | SKRERQLAKAI I TPVVFYRSGTETKI TFALKKLI I DREVVANVI GLSGDSERVSMTENVE | 240 |
| DPP11_BL.pro      | SKRERQLAKAI I TPVVFYRSGTETKI TFALKKLI I DREVVANVI GLSGDSERVSMTENVE | 240 |
| DPP12_BL.pro      | SKRERQLAKAI I TPVVFYRSGTETKI TFALKKLI I DREVVANVI GLSGDSERVSMTENVE | 240 |
| DPP13_BL.pro      | SKRERQLAKAI I TPVVFYRSGTETKI TFALKKLI I DREVVANVI GLSGDSERVSMTENVE | 240 |
| DPP15_BL.pro      | SKRERQLAKAI I TPVVFYRSGTETKI TFALKKLI I DREVVANVI GLSGDSERVSMTENVE | 240 |
| DPP16_BL.pro      | SKRERQLAKAI I TPVVFYRSGTETKI TFALKKLI I DREVVANVI GLSGDSERVSMTENVE | 240 |
| DPP17_BL.pro      | SKRERQLAKAI I TPVVFYRSGTETKI TFALKKLI I DREVVANVI GLSGDSERVSMTENVE | 240 |
| DPP19_BL.pro      | SKRERQLAKAI I TPVVFYRSGTETKI TFALKKLI I DREVVANVI GLSGDSERVSMTENVE | 240 |
| DPP20_BL.pro      | SKRERQLAKAI I TPVVFYRSGTETKI TFALKKLI I DREVVANVI GLSGDSERVSMTENVE | 240 |
| DPP21_BL.pro      | SKRERQLAKAI I TPVVFYRSGTETKI TFALKKLI I DREVVANVI GLSGDSERVSMTENVE | 240 |
| CL3_I3L.pro       | SKRERQLAKAI I TPVVFYRSGTETKI TFALKKLI I DREVVANVI GLSGDSERVSMTENVE | 240 |
| VACV-3737_I3L.pro | SKRERQLAKAI I TPVVFYRSGTETKI TFALKKLI I DREVVANVI GLSGDSERVSMTENVE | 240 |
| VACV-DUKE_I3L.pro | SKRERQLAKAI I TPVVFYRSGTETKI TFALKKLI I DREVVANVI GLSGDSERVSMTENVE | 240 |

+ Majority

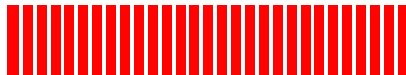

Majority

EDLARNLGLVDI DDEYDESDSKEKPI FNV  
 250 260

|                   |                                 |     |
|-------------------|---------------------------------|-----|
| ACAM2000_BL.pro   | EDLARNLGLVDI DDEYDESDSKEKPI FNV | 269 |
| DPP9_BL.pro       | EDLARNLGLVDI DDEYDESDSKEKPI FNV | 269 |
| DPP10_BL.pro      | EDLARNLGLVDI DDEYDESDSKEKPI FNV | 269 |
| DPP11_BL.pro      | EDLARNLGLVDI DDEYDESDSKEKPI FNV | 269 |
| DPP12_BL.pro      | EDLARNLGLVDI DDEYDESDSKEKPI FNV | 269 |
| DPP13_BL.pro      | EDLARNLGLVDI DDEYDESDSKEKPI FNV | 269 |
| DPP15_BL.pro      | EDLARNLGLVDI DDEYDESDSKEKPI FNV | 269 |
| DPP16_BL.pro      | EDLARNLGLVDI DDEYDESDSKEKPI FNV | 269 |
| DPP17_BL.pro      | EDLARNLGLVDI DDEYDESDSKEKPI FNV | 269 |
| DPP19_BL.pro      | EDLARNLGLVDI DDEYDESDSKEKPI FNV | 269 |
| DPP20_BL.pro      | EDLARNLGLVDI DDEYDESDSKEKPI FNV | 269 |
| DPP21_BL.pro      | EDLARNLGLVDI DDEYDESDSKEKPI FNV | 269 |
| CL3_I3L.pro       | EDLARNLGLVDI DDEYDESDSKEKPI FNV | 269 |
| VACV-3737_I3L.pro | EDLARNLGLVDI DDEYDESDSKEKPI FNV | 269 |
| VACV-DUKE_I3L.pro | EDLARNLGLVDI DDEYDESDSKEKPI FNV | 269 |















+ Majority

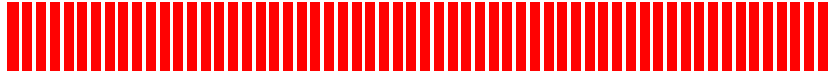

Majority

NL SKFMMVLPGAANKGKI SKFKI PI SDYTYGDDFNQTKKLNKMTVELMNLKELGSFDLEN  
 1090 1100 1110 1120 1130 1140

|                   |                                                                  |      |
|-------------------|------------------------------------------------------------------|------|
| ACAM2000_J6R.pro  | NL SKFMMVLPGAANKGKI SKFKI PI SDYTYGDDFNQTKKLNKMTVELMNLKELGSFDLEN | 1140 |
| DPP9_J6R.pro      | NL SKFMMVLPGAANKGKI SKFKI PI SDYTYGDDFNQTKKLNKMTVELMNLKELGSFDLEN | 1140 |
| DPP10_J6R.pro     | NL SKFMMVLPGAANKGKI SKFKI PI SDYTYGDDFNQTKKLNKMTVELMNLKELGSFDLEN | 1140 |
| DPP11_J6R.pro     | NL SKFMMVLPGAANKGKI SKFKI PI SDYTYGDDFNQTKKLNKMTVELMNLKELGSFDLEN | 1140 |
| DPP12_J6R.pro     | NL SKFMMVLPGAANKGKI SKFKI PI SDYTYGDDFNQTKKLNKMTVELMNLKELGSFDLEN | 1140 |
| DPP13_J6R.pro     | NL SKFMMVLPGAANKGKI SKFKI PI SDYTYGDDFNQTKKLNKMTVELMNLKELGSFDLEN | 1140 |
| DPP15_J6R.pro     | NL SKFMMVLPGAANKGKI SKFKI PI SDYTYGDDFNQTKKLNKMTVELMNLKELGSFDLEN | 1140 |
| DPP16_J6R.pro     | NL SKFMMVLPGAANKGKI SKFKI PI SDYTYGDDFNQTKKLNKMTVELMNLKELGSFDLEN | 1140 |
| DPP17_J6R.pro     | NL SKFMMVLPGAANKGKI SKFKI PI SDYTYGDDFNQTKKLNKMTVELMNLKELGSFDLEN | 1140 |
| DPP19_J6R.pro     | NL SKFMMVLPGAANKGKI SKFKI PI SDYTYGDDFNQTKKLNKMTVELMNLKELGSFDLEN | 1140 |
| DPP20_J6R.pro     | NL SKFMMVLPGAANKGKI SKFKI PI SDYTYGDDFNQTKKLNKMTVELMNLKELGSFDLEN | 1140 |
| DPP21_J6R.pro     | NL SKFMMVLPGAANKGKI SKFKI PI SDYTYGDDFNQTKKLNKMTVELMNLKELGSFDLEN | 1140 |
| CL3_J6R.pro       | NL SKFMMVLPGAANKGKI SKFKI PI SDYTYGDDFNQTKKLNKMTVELMNLKELGSFDLEN | 1140 |
| VACV-3737_J6R.pro | NL SKFMMVLPGAANKGKI SKFKI PI SDYTYGDDFNQTKKLNKMTVELMNLKELGSFDLEN | 1140 |
| VACV-DUKE_J6R.pro | NL SKFMMVLPGAANKGKI SKFKI PI SDYTYGDDFNQTKKLNKMTVELMNLKELGSFDLEN | 1140 |

+ Majority

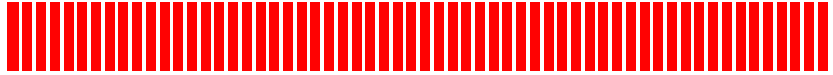

Majority

VNVYPGVWNTYDI FGI EAAREYLCEAMLNTYGE GFDYLYQPCDLLASLLCASYEPESV NK  
 1150 1160 1170 1180 1190 1200

|                   |                                                                  |      |
|-------------------|------------------------------------------------------------------|------|
| ACAM2000_J6R.pro  | VNVYPGVWNTYDI FGI EAAREYLCEAMLNTYGE GFDYLYQPCDLLASLLCASYEPESV NK | 1200 |
| DPP9_J6R.pro      | VNVYPGVWNTYDI FGI EAAREYLCEAMLNTYGE GFDYLYQPCDLLASLLCASYEPESV NK | 1200 |
| DPP10_J6R.pro     | VNVYPGVWNTYDI FGI EAAREYLCEAMLNTYGE GFDYLYQPCDLLASLLCASYEPESV NK | 1200 |
| DPP11_J6R.pro     | VNVYPGVWNTYDI FGI EAAREYLCEAMLNTYGE GFDYLYQPCDLLASLLCASYEPESV NK | 1200 |
| DPP12_J6R.pro     | VNVYPGVWNTYDI FGI EAAREYLCEAMLNTYGE GFDYLYQPCDLLASLLCASYEPESV NK | 1200 |
| DPP13_J6R.pro     | VNVYPGVWNTYDI FGI EAAREYLCEAMLNTYGE GFDYLYQPCDLLASLLCASYEPESV NK | 1200 |
| DPP15_J6R.pro     | VNVYPGVWNTYDI FGI EAAREYLCEAMLNTYGE GFDYLYQPCDLLASLLCASYEPESV NK | 1200 |
| DPP16_J6R.pro     | VNVYPGVWNTYDI FGI EAAREYLCEAMLNTYGE GFDYLYQPCDLLASLLCASYEPESV NK | 1200 |
| DPP17_J6R.pro     | VNVYPGVWNTYDI FGI EAAREYLCEAMLNTYGE GFDYLYQPCDLLASLLCASYEPESV NK | 1200 |
| DPP19_J6R.pro     | VNVYPGVWNTYDI FGI EAAREYLCEAMLNTYGE GFDYLYQPCDLLASLLCASYEPESV NK | 1200 |
| DPP20_J6R.pro     | VNVYPGVWNTYDI FGI EAAREYLCEAMLNTYGE GFDYLYQPCDLLASLLCASYEPESV NK | 1200 |
| DPP21_J6R.pro     | VNVYPGVWNTYDI FGI EAAREYLCEAMLNTYGE GFDYLYQPCDLLASLLCASYEPESV NK | 1200 |
| CL3_J6R.pro       | VNVYPGVWNTYDI FGI EAAREYLCEAMLNTYGE GFDYLYQPCDLLASLLCASYEPESV NK | 1200 |
| VACV-3737_J6R.pro | VNVYPGVWNTYDI FGI EAAREYLCEAMLNTYGE GFDYLYQPCDLLASLLCASYEPESV NK | 1200 |
| VACV-DUKE_J6R.pro | VNVYPGVWNTYDI FGI EAAREYLCEAMLNTYGE GFDYLYQPCDLLASLLCASYEPESV NK | 1200 |

+ Majority

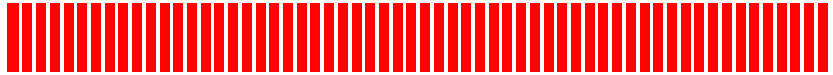

Majority

FKFGAASTLKRATFGDNKALLNAALHKKSEPI NDNSSCHFFSKVPNI GTGYKYFI DLGL  
 1210 1220 1230 1240 1250 1260

|                   |                                                                |      |
|-------------------|----------------------------------------------------------------|------|
| ACAM2000_J6R.pro  | FKFGAASTLKRATFGDNKALLNAALHKKSEPI NDNSSCHFFSKVPNI GTGYKYFI DLGL | 1260 |
| DPP9_J6R.pro      | FKFGAASTLKRATFGDNKALLNAALHKKSEPI NDNSSCHFFSKVPNI GTGYKYFI DLGL | 1260 |
| DPP10_J6R.pro     | FKFGAASTLKRATFGDNKALLNAALHKKSEPI NDNSSCHFFSKVPNI GTGYKYFI DLGL | 1260 |
| DPP11_J6R.pro     | FKFGAASTLKRATFGDNKALLNAALHKKSEPI NDNSSCHFFSKVPNI GTGYKYFI DLGL | 1260 |
| DPP12_J6R.pro     | FKFGAASTLKRATFGDNKALLNAALHKKSEPI NDNSSCHFFSKVPNI GTGYKYFI DLGL | 1260 |
| DPP13_J6R.pro     | FKFGAASTLKRATFGDNKALLNAALHKKSEPI NDNSSCHFFSKVPNI GTGYKYFI DLGL | 1260 |
| DPP15_J6R.pro     | FKFGAASTLKRATFGDNKALLNAALHKKSEPI NDNSSCHFFSKVPNI GTGYKYFI DLGL | 1260 |
| DPP16_J6R.pro     | FKFGAASTLKRATFGDNKALLNAALHKKSEPI NDNSSCHFFSKVPNI GTGYKYFI DLGL | 1260 |
| DPP17_J6R.pro     | FKFGAASTLKRATFGDNKALLNAALHKKSEPI NDNSSCHFFSKVPNI GTGYKYFI DLGL | 1260 |
| DPP19_J6R.pro     | FKFGAASTLKRATFGDNKALLNAALHKKSEPI NDNSSCHFFSKVPNI GTGYKYFI DLGL | 1260 |
| DPP20_J6R.pro     | FKFGAASTLKRATFGDNKALLNAALHKKSEPI NDNSSCHFFSKVPNI GTGYKYFI DLGL | 1260 |
| DPP21_J6R.pro     | FKFGAASTLKRATFGDNKALLNAALHKKSEPI NDNSSCHFFSKVPNI GTGYKYFI DLGL | 1260 |
| CL3_J6R.pro       | FKFGAASTLKRATFGDNKALLNAALHKKSEPI NDNSSCHFFSKVPNI GTGYKYFI DLGL | 1260 |
| VACV-3737_J6R.pro | FKFGAASTLKRATFGDNKALLNAALHKKSEPI NDNSSCHFFSKVPNI GTGYKYFI DLGL | 1260 |
| VACV-DUKE_J6R.pro | FKFGAASTLKRATFGDNKALLNAALHKKSEPI NDNSSCHFFSKVPNI GTGYKYFI DLGL | 1260 |

+ Majority

Majority

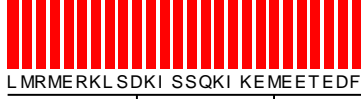

|                   |                              |      |
|-------------------|------------------------------|------|
| ACAM2000_J6R.pro  | LMRMERKLSDKI SSQKI KEMEETEDF | 1286 |
| DPP9_J6R.pro      | LMRMERKLSDKI SSQKI KEMEETEDF | 1286 |
| DPP10_J6R.pro     | LMRMERKLSDKI SSQKI KEMEETEDF | 1286 |
| DPP11_J6R.pro     | LMRMERKLSDKI SSQKI KEMEETEDF | 1286 |
| DPP12_J6R.pro     | LMRMERKLSDKI SSQKI KEMEETEDF | 1286 |
| DPP13_J6R.pro     | LMRMERKLSDKI SSQKI KEMEETEDF | 1286 |
| DPP15_J6R.pro     | LMRMERKLSDKI SSQKI KEMEETEDF | 1286 |
| DPP16_J6R.pro     | LMRMERKLSDKI SSQKI KEMEETEDF | 1286 |
| DPP17_J6R.pro     | LMRMERKLSDKI SSQKI KEMEETEDF | 1286 |
| DPP19_J6R.pro     | LMRMERKLSDKI SSQKI KEMEETEDF | 1286 |
| DPP20_J6R.pro     | LMRMERKLSDKI SSQKI KEMEETEDF | 1286 |
| DPP21_J6R.pro     | LMRMERKLSDKI SSQKI KEMEETEDF | 1286 |
| CL3_J6R.pro       | LMRMERKLSDKI SSQKI KEMEETEDF | 1286 |
| VACV-3737_J6R.pro | LMRMERKLSDKI SSQKI KEMEETEDF | 1286 |
| VACV-DUKE_J6R.pro | LMRMERKLSDKI SSQKI KEMEETEDF | 1286 |

# L. A11R

+ Majority

Majority

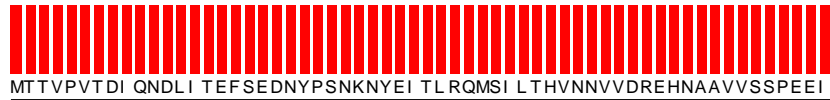

| Variant            | Sequence                                                           | Position |
|--------------------|--------------------------------------------------------------------|----------|
| ACAM2000_A11R.pro  | MTTVPVTDI QNDLI TEFSEDNYP SNKNY EI TLRQMSI LTHVNNVVDREHNAAVVSSPEEI | 60       |
| DFF9_A11R.pro      | MTTVPVTDI QNDLI TEFSEDNYP SNKNY EI TLRQMSI LTHVNNVVDREHNAAVVSSPEEI | 60       |
| DFF10_A11R.pro     | MTTVPVTDI QNDLI TEFSEDNYP SNKNY EI TLRQMSI LTHVNNVVDREHNAAVVSSPEEI | 60       |
| DFF11_A11R.pro     | MTTVPVTDI QNDLI TEFSEDNYP SNKNY EI TLRQMSI LTHVNNVVDREHNAAVVSSPEEI | 60       |
| DFF12_A11R.pro     | MTTVPVTDI QNDLI TEFSEDNYP SNKNY EI TLRQMSI LTHVNNVVDREHNAAVVSSPEEI | 60       |
| DFF13_A11R.pro     | MTTVPVTDI QNDLI TEFSEDNYP SNKNY EI TLRQMSI LTHVNNVVDREHNAAVVSSPEEI | 60       |
| DFF15_A11R.pro     | MTTVPVTDI QNDLI TEFSEDNYP SNKNY EI TLRQMSI LTHVNNVVDREHNAAVVSSPEEI | 60       |
| DFF16_A11R.pro     | MTTVPVTDI QNDLI TEFSEDNYP SNKNY EI TLRQMSI LTHVNNVVDREHNAAVVSSPEEI | 60       |
| DFF17_A11R.pro     | MTTVPVTDI QNDLI TEFSEDNYP SNKNY EI TLRQMSI LTHVNNVVDREHNAAVVSSPEEI | 60       |
| DFF19_A11R.pro     | MTTVPVTDI QNDLI TEFSEDNYP SNKNY EI TLRQMSI LTHVNNVVDREHNAAVVSSPEEI | 60       |
| DFF20_A11R.pro     | MTTVPVTDI QNDLI TEFSEDNYP SNKNY EI TLRQMSI LTHVNNVVDREHNAAVVSSPEEI | 60       |
| DFF21_A11R.pro     | MTTVPVTDI QNDLI TEFSEDNYP SNKNY EI TLRQMSI LTHVNNVVDREHNAAVVSSPEEI | 60       |
| CL3_A11R.pro       | MTTVPVTDI QNDLI TEFSEDNYP SNKNY EI TLRQMSI LTHVNNVVDREHNAAVVSSPEEI | 60       |
| VACV-3737_A11R.pro | MTTVPVTDI QNDLI TEFSEDNYP SNKNY EI TLRQMSI LTHVNNVVDREHNAAVVSSPEEI | 60       |
| VACV-DUKE_A11R.pro | MTTVPVTDI QNDLI TEFSEDNYP SNKNY EI TLRQMSI LTHVNNVVDREHNAAVVSSPEEI | 60       |

+ Majority

Majority

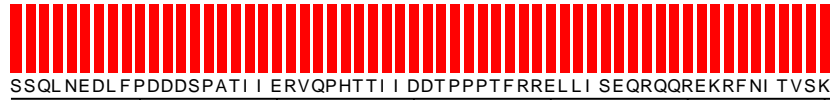

| Variant            | Sequence                                                           | Position |
|--------------------|--------------------------------------------------------------------|----------|
| ACAM2000_A11R.pro  | SSQLNEDLFPDDDSPATI I ERVQPHTTI I DDTPPPTFRRELLI SEQRQQREKRFNI TVSK | 120      |
| DFF9_A11R.pro      | SSQLNEDLFPDDDSPATI I ERVQPHTTI I DDTPPPTFRRELLI SEQRQQREKRFNI TVSK | 120      |
| DFF10_A11R.pro     | SSQLNEDLFPDDDSPATI I ERVQPHTTI I DDTPPPTFRRELLI SEQRQQREKRFNI TVSK | 120      |
| DFF11_A11R.pro     | SSQLNEDLFPDDDSPATI I ERVQPHTTI I DDTPPPTFRRELLI SEQRQQREKRFNI TVSK | 120      |
| DFF12_A11R.pro     | SSQLNEDLFPDDDSPATI I ERVQPHTTI I DDTPPPTFRRELLI SEQRQQREKRFNI TVSK | 120      |
| DFF13_A11R.pro     | SSQLNEDLFPDDDSPATI I ERVQPHTTI I DDTPPPTFRRELLI SEQRQQREKRFNI TVSK | 120      |
| DFF15_A11R.pro     | SSQLNEDLFPDDDSPATI I ERVQPHTTI I DDTPPPTFRRELLI SEQRQQREKRFNI TVSK | 120      |
| DFF16_A11R.pro     | SSQLNEDLFPDDDSPATI I ERVQPHTTI I DDTPPPTFRRELLI SEQRQQREKRFNI TVSK | 120      |
| DFF17_A11R.pro     | SSQLNEDLFPDDDSPATI I ERVQPHTTI I DDTPPPTFRRELLI SEQRQQREKRFNI TVSK | 120      |
| DFF19_A11R.pro     | SSQLNEDLFPDDDSPATI I ERVQPHTTI I DDTPPPTFRRELLI SEQRQQREKRFNI TVSK | 120      |
| DFF20_A11R.pro     | SSQLNEDLFPDDDSPATI I ERVQPHTTI I DDTPPPTFRRELLI SEQRQQREKRFNI TVSK | 120      |
| DFF21_A11R.pro     | SSQLNEDLFPDDDSPATI I ERVQPHTTI I DDTPPPTFRRELLI SEQRQQREKRFNI TVSK | 120      |
| CL3_A11R.pro       | SSQLNEDLFPDDDSPATI I ERVQPHTTI I DDTPPPTFRRELLI SEQRQQREKRFNI TVSK | 120      |
| VACV-3737_A11R.pro | SSQLNEDLFPDDDSPATI I ERVQPHTTI I DDTPPPTFRRELLI SEQRQQREKRFNI TVSK | 120      |
| VACV-DUKE_A11R.pro | SSQLNEDLFPDDDSPATI I ERVQPHTTI I DDTPPPTFRRELLI SEQRQQREKRFNI TVSK | 120      |

+ Majority

Majority

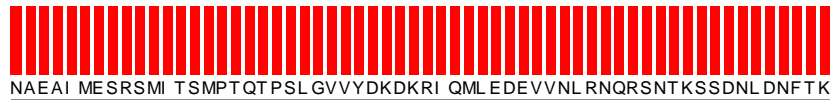

| Variant            | Sequence                                                           | Position |
|--------------------|--------------------------------------------------------------------|----------|
| ACAM2000_A11R.pro  | NAAEI MESRSMI TSMPTQT PSLGVVYDKDKRI QMLEDEVVNL RNQRSNTKSSDNL DNFTK | 180      |
| DFF9_A11R.pro      | NAAEI MESRSMI TSMPTQT PSLGVVYDKDKRI QMLEDEVVNL RNQRSNTKSSDNL DNFTK | 180      |
| DFF10_A11R.pro     | NAAEI MESRSMI TSMPTQT PSLGVVYDKDKRI QMLEDEVVNL RNQRSNTKSSDNL DNFTK | 180      |
| DFF11_A11R.pro     | NAAEI MESRSMI TSMPTQT PSLGVVYDKDKRI QMLEDEVVNL RNQRSNTKSSDNL DNFTK | 180      |
| DFF12_A11R.pro     | NAAEI MESRSMI TSMPTQT PSLGVVYDKDKRI QMLEDEVVNL RNQRSNTKSSDNL DNFTK | 180      |
| DFF13_A11R.pro     | NAAEI MESRSMI TSMPTQT PSLGVVYDKDKRI QMLEDEVVNL RNQRSNTKSSDNL DNFTK | 180      |
| DFF15_A11R.pro     | NAAEI MESRSMI TSMPTQT PSLGVVYDKDKRI QMLEDEVVNL RNQRSNTKSSDNL DNFTK | 180      |
| DFF16_A11R.pro     | NAAEI MESRSMI TSMPTQT PSLGVVYDKDKRI QMLEDEVVNL RNQRSNTKSSDNL DNFTK | 180      |
| DFF17_A11R.pro     | NAAEI MESRSMI TSMPTQT PSLGVVYDKDKRI QMLEDEVVNL RNQRSNTKSSDNL DNFTK | 180      |
| DFF19_A11R.pro     | NAAEI MESRSMI TSMPTQT PSLGVVYDKDKRI QMLEDEVVNL RNQRSNTKSSDNL DNFTK | 180      |
| DFF20_A11R.pro     | NAAEI MESRSMI TSMPTQT PSLGVVYDKDKRI QMLEDEVVNL RNQRSNTKSSDNL DNFTK | 180      |
| DFF21_A11R.pro     | NAAEI MESRSMI TSMPTQT PSLGVVYDKDKRI QMLEDEVVNL RNQRSNTKSSDNL DNFTK | 180      |
| CL3_A11R.pro       | NAAEI MESRSMI TSMPTQT PSLGVVYDKDKRI QMLEDEVVNL RNQRSNTKSSDNL DNFTK | 180      |
| VACV-3737_A11R.pro | NAAEI MESRSMI TSMPTQT PSLGVVYDKDKRI QMLEDEVVNL RNQRSNTKSSDNL DNFTK | 180      |
| VACV-DUKE_A11R.pro | NAAEI MESRSMI TSMPTQT PSLGVVYDKDKRI QMLEDEVVNL RNQRSNTKSSDNL DNFTK | 180      |

+ Majority



Majority

I LFGKTPYKSTEVNKR I AI VNYANLNGSPLSVEDL DVCSEDEI DRI YKTI KQYHESRKRK  
 190 200 210 220 230 240

|                    |                                                                      |     |
|--------------------|----------------------------------------------------------------------|-----|
| ACAM2000_A11R.pro  | I LFGKTPYKSTEVNKR I AI VNYANLNGSPLSVEDL DVCSEDEI DRI YKTI KQYHESRKRK | 240 |
| DPP9_A11R.pro      | I LFGKTPYKSTEVNKR I AI VNYANLNGSPLSVEDL DVCSEDEI DRI YKTI KQYHESRKRK | 240 |
| DPP10_A11R.pro     | I LFGKTPYKSTEVNKR I AI VNYANLNGSPLSVEDL DVCSEDEI DRI YKTI KQYHESRKRK | 240 |
| DPP11_A11R.pro     | I LFGKTPYKSTEVNKR I AI VNYANLNGSPLSVEDL DVCSEDEI DRI YKTI KQYHESRKRK | 240 |
| DPP12_A11R.pro     | I LFGKTPYKSTEVNKR I AI VNYANLNGSPLSVEDL DVCSEDEI DRI YKTI KQYHESRKRK | 240 |
| DPP13_A11R.pro     | I LFGKTPYKSTEVNKR I AI VNYANLNGSPLSVEDL DVCSEDEI DRI YKTI KQYHESRKRK | 240 |
| DPP15_A11R.pro     | I LFGKTPYKSTEVNKR I AI VNYANLNGSPLSVEDL DVCSEDEI DRI YKTI KQYHESRKRK | 240 |
| DPP16_A11R.pro     | I LFGKTPYKSTEVNKR I AI VNYANLNGSPLSVEDL DVCSEDEI DRI YKTI KQYHESRKRK | 240 |
| DPP17_A11R.pro     | I LFGKTPYKSTEVNKR I AI VNYANLNGSPLSVEDL DVCSEDEI DRI YKTI KQYHESRKRK | 240 |
| DPP19_A11R.pro     | I LFGKTPYKSTEVNKR I AI VNYANLNGSPLSVEDL DVCSEDEI DRI YKTI KQYHESRKRK | 240 |
| DPP20_A11R.pro     | I LFGKTPYKSTEVNKR I AI VNYANLNGSPLSVEDL DVCSEDEI DRI YKTI KQYHESRKRK | 240 |
| DPP21_A11R.pro     | I LFGKTPYKSTEVNKR I AI VNYANLNGSPLSVEDL DVCSEDEI DRI YKTI KQYHESRKRK | 240 |
| CL3_A11R.pro       | I LFGKTPYKSTEVNKR I AI VNYANLNGSPLSVEDL DVCSEDEI DRI YKTI KQYHESRKRK | 240 |
| VACV-3737_A11R.pro | I LFGKTPYKSTEVNKR I AI VNYANLNGSPLSVEDL DVCSEDEI DRI YKTI KQYHESRKRK | 240 |
| VACV-DUKE_A11R.pro | I LFGKTPYKSTEVNKR I AI VNYANLNGSPLSVEDL DVCSEDEI DRI YKTI KQYHESRKRK | 240 |

+ Majority



Majority

I I VTNVI I I VI NI I EQALLKLGFEI KGLSTDI TSEI I DVEI GDDCDAVASKLGI GNSPV  
 250 260 270 280 290 300

|                    |                                                                           |     |
|--------------------|---------------------------------------------------------------------------|-----|
| ACAM2000_A11R.pro  | I I VTNVI I I VI NI I EQALLKLGFEI KGLSTDI TSEI I DVEI GDDCDAVASKLGI GNSPV | 300 |
| DPP9_A11R.pro      | I I VTNVI I I VI NI I EQALLKLGFEI KGLSTDI TSEI I DVEI GDDCDAVASKLGI GNSPV | 300 |
| DPP10_A11R.pro     | I I VTNVI I I VI NI I EQALLKLGFEI KGLSTDI TSEI I DVEI GDDCDAVASKLGI GNSPV | 300 |
| DPP11_A11R.pro     | I I VTNVI I I VI NI I EQALLKLGFEI KGLSTDI TSEI I DVEI GDDCDAVASKLGI GNSPV | 300 |
| DPP12_A11R.pro     | I I VTNVI I I VI NI I EQALLKLGFEI KGLSTDI TSEI I DVEI GDDCDAVASKLGI GNSPV | 300 |
| DPP13_A11R.pro     | I I VTNVI I I VI NI I EQALLKLGFEI KGLSTDI TSEI I DVEI GDDCDAVASKLGI GNSPV | 300 |
| DPP15_A11R.pro     | I I VTNVI I I VI NI I EQALLKLGFEI KGLSTDI TSEI I DVEI GDDCDAVASKLGI GNSPV | 300 |
| DPP16_A11R.pro     | I I VTNVI I I VI NI I EQALLKLGFEI KGLSTDI TSEI I DVEI GDDCDAVASKLGI GNSPV | 300 |
| DPP17_A11R.pro     | I I VTNVI I I VI NI I EQALLKLGFEI KGLSTDI TSEI I DVEI GDDCDAVASKLGI GNSPV | 300 |
| DPP19_A11R.pro     | I I VTNVI I I VI NI I EQALLKLGFEI KGLSTDI TSEI I DVEI GDDCDAVASKLGI GNSPV | 300 |
| DPP20_A11R.pro     | I I VTNVI I I VI NI I EQALLKLGFEI KGLSTDI TSEI I DVEI GDDCDAVASKLGI GNSPV | 300 |
| DPP21_A11R.pro     | I I VTNVI I I VI NI I EQALLKLGFEI KGLSTDI TSEI I DVEI GDDCDAVASKLGI GNSPV | 300 |
| CL3_A11R.pro       | I I VTNVI I I VI NI I EQALLKLGFEI KGLSTDI TSEI I DVEI GDDCDAVASKLGI GNSPV | 300 |
| VACV-3737_A11R.pro | I I VTNVI I I VI NI I EQALLKLGFEI KGLSTDI TSEI I DVEI GDDCDAVASKLGI GNSPV | 300 |
| VACV-DUKE_A11R.pro | I I VTNVI I I VI NI I EQALLKLGFEI KGLSTDI TSEI I DVEI GDDCDAVASKLGI GNSPV | 300 |

+ Majority

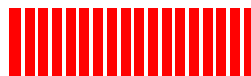

Majority

LNI VLF I LKI FVKRI KI I  
 310

|                    |                          |     |
|--------------------|--------------------------|-----|
| ACAM2000_A11R.pro  | LNI VLF I LKI FVKRI KI I | 318 |
| DPP9_A11R.pro      | LNI VLF I LKI FVKRI KI I | 318 |
| DPP10_A11R.pro     | LNI VLF I LKI FVKRI KI I | 318 |
| DPP11_A11R.pro     | LNI VLF I LKI FVKRI KI I | 318 |
| DPP12_A11R.pro     | LNI VLF I LKI FVKRI KI I | 318 |
| DPP13_A11R.pro     | LNI VLF I LKI FVKRI KI I | 318 |
| DPP15_A11R.pro     | LNI VLF I LKI FVKRI KI I | 318 |
| DPP16_A11R.pro     | LNI VLF I LKI FVKRI KI I | 318 |
| DPP17_A11R.pro     | LNI VLF I LKI FVKRI KI I | 318 |
| DPP19_A11R.pro     | LNI VLF I LKI FVKRI KI I | 318 |
| DPP20_A11R.pro     | LNI VLF I LKI FVKRI KI I | 318 |
| DPP21_A11R.pro     | LNI VLF I LKI FVKRI KI I | 318 |
| CL3_A11R.pro       | LNI VLF I LKI FVKRI KI I | 318 |
| VACV-3737_A11R.pro | LNI VLF I LKI FVKRI KI I | 318 |
| VACV-DUKE_A11R.pro | LNI VLF I LKI FVKRI KI I | 318 |

**M. A27L**

+ Majority

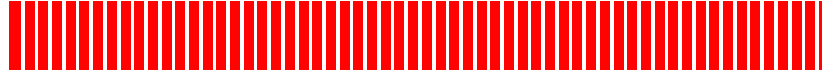

Majority

MDGTLFPGDDDLAI PATEFFSTKAAKKPEAKREAI VKAEDDDNEETLKQRLTNLEKKI TN  
 10 20 30 40 50 60

|                    |                                                                 |    |
|--------------------|-----------------------------------------------------------------|----|
| ACAM2000_A27L.pro  | MDGTLFPGDDDLAI PATEFFSTKAAKKPEAKREAI VKAEDDDNEETLKQRLTNLEKKI TN | 60 |
| DPP9_A27L.pro      | MDGTLFPGDDDLAI PATEFFSTKAAKKPEAKREAI VKAEDDDNEETLKQRLTNLEKKI TN | 60 |
| DPP10_A27L.pro     | MDGTLFPGDDDLAI PATEFFSTKAAKKPEAKREAI VKAEDDDNEETLKQRLTNLEKKI TN | 60 |
| DPP11_A27L.pro     | MDGTLFPGDDDLAI PATEFFSTKAAKKPEAKREAI VKAEDDDNEETLKQRLTNLEKKI TN | 60 |
| DPP12_A27L.pro     | MDGTLFPGDDDLAI PATEFFSTKAAKKPEAKREAI VKAEDDDNEETLKQRLTNLEKKI TN | 60 |
| DPP13_A27L.pro     | MDGTLFPGDDDLAI PATEFFSTKAAKKPEAKREAI VKAEDDDNEETLKQRLTNLEKKI TN | 60 |
| DPP15_A27L.pro     | MDGTLFPGDDDLAI PATEFFSTKAAKKPEAKREAI VKAEDDDNEETLKQRLTNLEKKI TN | 60 |
| DPP16_A27L.pro     | MDGTLFPGDDDLAI PATEFFSTKAAKKPEAKREAI VKAEDDDNEETLKQRLTNLEKKI TN | 60 |
| DPP17_A27L.pro     | MDGTLFPGDDDLAI PATEFFSTKAAKKPEAKREAI VKAEDDDNEETLKQRLTNLEKKI TN | 60 |
| DPP19_A27L.pro     | MDGTLFPGDDDLAI PATEFFSTKAAKKPEAKREAI VKAEDDDNEETLKQRLTNLEKKI TN | 60 |
| DPP20_A27L.pro     | MDGTLFPGDDDLAI PATEFFSTKAAKKPEAKREAI VKAEDDDNEETLKQRLTNLEKKI TN | 60 |
| DPP21_A27L.pro     | MDGTLFPGDDDLAI PATEFFSTKAAKKPEAKREAI VKAEDDDNEETLKQRLTNLEKKI TN | 60 |
| CL3_A27L.pro       | MDGTLFPGDDDLAI PATEFFSTKAAKKPEAKREAI VKAEDDDNEETLKQRLTNLEKKI TN | 60 |
| VACV-3737_A27L.pro | MDGTLFPGDDDLAI PATEFFSTKAAKKPEAKREAI VKAEDDDNEETLKQRLTNLEKKI TN | 60 |
| VACV-DUKE_A27L.pro | MDGTLFPGDDDLAI PATEFFSTKAAKKPEAKREAI VKAEDDDNEETLKQRLTNLEKKI TN | 60 |

+ Majority

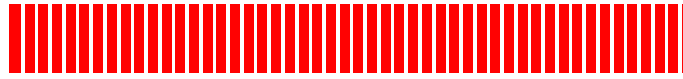

Majority

VTTKFEQI EKCCCKRNDEVLFRLNHAETLRAAMI SLAKKI DVQTGRRPYE  
 70 80 90 100 110

|                    |                                                       |     |
|--------------------|-------------------------------------------------------|-----|
| ACAM2000_A27L.pro  | VTTKFEQI EKCCCKRNDEVLFRLNHAETLRAAMI SLAKKI DVQTGRRPYE | 110 |
| DPP9_A27L.pro      | VTTKFEQI EKCCCKRNDEVLFRLNHAETLRAAMI SLAKKI DVQTGRRPYE | 110 |
| DPP10_A27L.pro     | VTTKFEQI EKCCCKRNDEVLFRLNHAETLRAAMI SLAKKI DVQTGRRPYE | 110 |
| DPP11_A27L.pro     | VTTKFEQI EKCCCKRNDEVLFRLNHAETLRAAMI SLAKKI DVQTGRRPYE | 110 |
| DPP12_A27L.pro     | VTTKFEQI EKCCCKRNDEVLFRLNHAETLRAAMI SLAKKI DVQTGRRPYE | 110 |
| DPP13_A27L.pro     | VTTKFEQI EKCCCKRNDEVLFRLNHAETLRAAMI SLAKKI DVQTGRRPYE | 110 |
| DPP15_A27L.pro     | VTTKFEQI EKCCCKRNDEVLFRLNHAETLRAAMI SLAKKI DVQTGRRPYE | 110 |
| DPP16_A27L.pro     | VTTKFEQI EKCCCKRNDEVLFRLNHAETLRAAMI SLAKKI DVQTGRRPYE | 110 |
| DPP17_A27L.pro     | VTTKFEQI EKCCCKRNDEVLFRLNHAETLRAAMI SLAKKI DVQTGRRPYE | 110 |
| DPP19_A27L.pro     | VTTKFEQI EKCCCKRNDEVLFRLNHAETLRAAMI SLAKKI DVQTGRRPYE | 110 |
| DPP20_A27L.pro     | VTTKFEQI EKCCCKRNDEVLFRLNHAETLRAAMI SLAKKI DVQTGRRPYE | 110 |
| DPP21_A27L.pro     | VTTKFEQI EKCCCKRNDEVLFRLNHAETLRAAMI SLAKKI DVQTGRRPYE | 110 |
| CL3_A27L.pro       | VTTKFEQI EKCCCKRNDEVLFRLNHAETLRAAMI SLAKKI DVQTGRRPYE | 110 |
| VACV-3737_A27L.pro | VTTKFEQI EKCCCKRNDEVLFRLNHAETLRAAMI SLAKKI DVQTGRRPYE | 110 |
| VACV-DUKE_A27L.pro | VTTKFEQI EKCCCKRNDEVLFRLNHAETLRAAMI SLAKKI DVQTGRRPYE | 110 |

# N. A33R

+ Majority

Majority

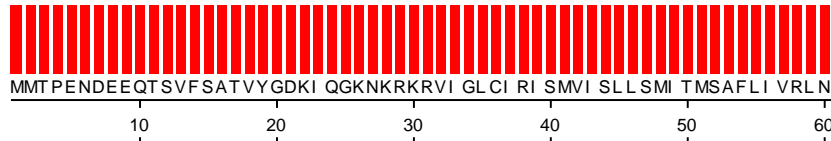

|                    |                                                                      |    |
|--------------------|----------------------------------------------------------------------|----|
| ACAM2000_A33R.pro  | MMT PENDEEQT SVFSATVYGDKI QGKNKRKRVI GLCI RISMVI SLLSMI TMSAFLI VRLN | 60 |
| DFF9_A33R.pro      | MMT PENDEEQT SVFSATVYGDKI QGKNKRKRVI GLCI RISMVI SLLSMI TMSAFLI VRLN | 60 |
| DFF10_A33R.pro     | MMT PENDEEQT SVFSATVYGDKI QGKNKRKRVI GLCI RISMVI SLLSMI TMSAFLI VRLN | 60 |
| DFF11_A33R.pro     | MMT PENDEEQT SVFSATVYGDKI QGKNKRKRVI GLCI RISMVI SLLSMI TMSAFLI VRLN | 60 |
| DFF12_A33R.pro     | MMT PENDEEQT SVFSATVYGDKI QGKNKRKRVI GLCI RISMVI SLLSMI TMSAFLI VRLN | 60 |
| DFF13_A33R.pro     | MMT PENDEEQT SVFSATVYGDKI QGKNKRKRVI GLCI RISMVI SLLSMI TMSAFLI VRLN | 60 |
| DFF15_A33R.pro     | MMT PENDEEQT SVFSATVYGDKI QGKNKRKRVI GLCI RISMVI SLLSMI TMSAFLI VRLN | 60 |
| DFF16_A33R.pro     | MMT PENDEEQT SVFSATVYGDKI QGKNKRKRVI GLCI RISMVI SLLSMI TMSAFLI VRLN | 60 |
| DFF17_A33R.pro     | MMT PENDEEQT SVFSATVYGDKI QGKNKRKRVI GLCI RISMVI SLLSMI TMSAFLI VRLN | 60 |
| DFF19_A33R.pro     | MMT PENDEEQT SVFSATVYGDKI QGKNKRKRVI GLCI RISMVI SLLSMI TMSAFLI VRLN | 60 |
| DFF20_A33R.pro     | MMT PENDEEQT SVFSATVYGDKI QGKNKRKRVI GLCI RISMVI SLLSMI TMSAFLI VRLN | 60 |
| DFF21_A33R.pro     | MMT PENDEEQT SVFSATVYGDKI QGKNKRKRVI GLCI RISMVI SLLSMI TMSAFLI VRLN | 60 |
| CL3_A33R.pro       | MMT PENDEEQT SVFSATVYGDKI QGKNKRKRVI GLCI RISMVI SLLSMI TMSAFLI VRLN | 60 |
| VACV-3737_A33R.pro | MMT PENDEEQT SVFSATVYGDKI QGKNKRKRVI GLCI RISMVI SLLSMI TMSAFLI VRLN | 60 |
| VACV-DUKE_A33R.pro | MMT PENDEEQT SVFSATVYGDKI QGKNKRKRVI GLCI RISMVI SLLSMI TMSAFLI VRLN | 60 |

+ Majority

Majority

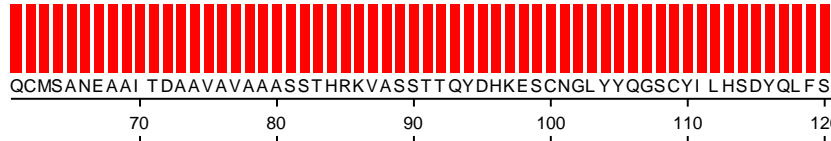

|                    |                                                                |     |
|--------------------|----------------------------------------------------------------|-----|
| ACAM2000_A33R.pro  | QCMSANEAAI TDAAVAVAAAASSTHRKVASSTTQYDHKESCNGLYYQGSCYI LHSYQLFS | 120 |
| DFF9_A33R.pro      | QCMSANEAAI TDAAVAVAAAASSTHRKVASSTTQYDHKESCNGLYYQGSCYI LHSYQLFS | 120 |
| DFF10_A33R.pro     | QCMSANEAAI TDAAVAVAAAASSTHRKVASSTTQYDHKESCNGLYYQGSCYI LHSYQLFS | 120 |
| DFF11_A33R.pro     | QCMSANEAAI TDAAVAVAAAASSTHRKVASSTTQYDHKESCNGLYYQGSCYI LHSYQLFS | 120 |
| DFF12_A33R.pro     | QCMSANEAAI TDAAVAVAAAASSTHRKVASSTTQYDHKESCNGLYYQGSCYI LHSYQLFS | 120 |
| DFF13_A33R.pro     | QCMSANEAAI TDAAVAVAAAASSTHRKVASSTTQYDHKESCNGLYYQGSCYI LHSYQLFS | 120 |
| DFF15_A33R.pro     | QCMSANEAAI TDAAVAVAAAASSTHRKVASSTTQYDHKESCNGLYYQGSCYI LHSYQLFS | 120 |
| DFF16_A33R.pro     | QCMSANEAAI TDAAVAVAAAASSTHRKVASSTTQYDHKESCNGLYYQGSCYI LHSYQLFS | 120 |
| DFF17_A33R.pro     | QCMSANEAAI TDAAVAVAAAASSTHRKVASSTTQYDHKESCNGLYYQGSCYI LHSYQLFS | 120 |
| DFF19_A33R.pro     | QCMSANEAAI TDAAVAVAAAASSTHRKVASSTTQYDHKESCNGLYYQGSCYI LHSYQLFS | 120 |
| DFF20_A33R.pro     | QCMSANEAAI TDAAVAVAAAASSTHRKVASSTTQYDHKESCNGLYYQGSCYI LHSYQLFS | 120 |
| DFF21_A33R.pro     | QCMSANEAAI TDAAVAVAAAASSTHRKVASSTTQYDHKESCNGLYYQGSCYI LHSYQLFS | 120 |
| CL3_A33R.pro       | QCMSANEAAI TDAAVAVAAAASSTHRKVASSTTQYDHKESCNGLYYQGSCYI LHSYQLFS | 120 |
| VACV-3737_A33R.pro | QCMSANEAAI TDAAVAVAAAASSTHRKVASSTTQYDHKESCNGLYYQGSCYI LHSYQLFS | 120 |
| VACV-DUKE_A33R.pro | QCMSANEAAI TDAAVAVAAAASSTHRKVASSTTQYDHKESCNGLYYQGSCYI LHSYQLFS | 120 |

+ Majority

Majority

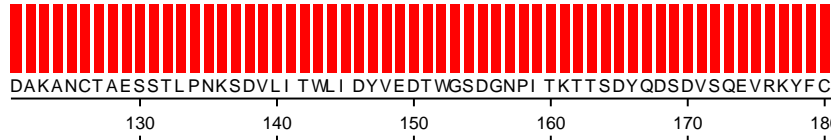

|                    |                                                                 |     |
|--------------------|-----------------------------------------------------------------|-----|
| ACAM2000_A33R.pro  | DAKANCTAESSTLPNKSDVLI TWLI DYVEDTWGSDGNPI TKTTSDYQSDVDSQEVRYKFC | 180 |
| DFF9_A33R.pro      | DAKANCTAESSTLPNKSDVLI TWLI DYVEDTWGSDGNPI TKTTSDYQSDVDSQEVRYKFC | 180 |
| DFF10_A33R.pro     | DAKANCTAESSTLPNKSDVLI TWLI DYVEDTWGSDGNPI TKTTSDYQSDVDSQEVRYKFC | 180 |
| DFF11_A33R.pro     | DAKANCTAESSTLPNKSDVLI TWLI DYVEDTWGSDGNPI TKTTSDYQSDVDSQEVRYKFC | 180 |
| DFF12_A33R.pro     | DAKANCTAESSTLPNKSDVLI TWLI DYVEDTWGSDGNPI TKTTSDYQSDVDSQEVRYKFC | 180 |
| DFF13_A33R.pro     | DAKANCTAESSTLPNKSDVLI TWLI DYVEDTWGSDGNPI TKTTSDYQSDVDSQEVRYKFC | 180 |
| DFF15_A33R.pro     | DAKANCTAESSTLPNKSDVLI TWLI DYVEDTWGSDGNPI TKTTSDYQSDVDSQEVRYKFC | 180 |
| DFF16_A33R.pro     | DAKANCTAESSTLPNKSDVLI TWLI DYVEDTWGSDGNPI TKTTSDYQSDVDSQEVRYKFC | 180 |
| DFF17_A33R.pro     | DAKANCTAESSTLPNKSDVLI TWLI DYVEDTWGSDGNPI TKTTSDYQSDVDSQEVRYKFC | 180 |
| DFF19_A33R.pro     | DAKANCTAESSTLPNKSDVLI TWLI DYVEDTWGSDGNPI TKTTSDYQSDVDSQEVRYKFC | 180 |
| DFF20_A33R.pro     | DAKANCTAESSTLPNKSDVLI TWLI DYVEDTWGSDGNPI TKTTSDYQSDVDSQEVRYKFC | 180 |
| DFF21_A33R.pro     | DAKANCTAESSTLPNKSDVLI TWLI DYVEDTWGSDGNPI TKTTSDYQSDVDSQEVRYKFC | 180 |
| CL3_A33R.pro       | DAKANCTAESSTLPNKSDVLI TWLI DYVEDTWGSDGNPI TKTTSDYQSDVDSQEVRYKFC | 180 |
| VACV-3737_A33R.pro | DAKANCTAESSTLPNKSDVLI TWLI DYVEDTWGSDGNPI TKTTSDYQSDVDSQEVRYKFC | 180 |
| VACV-DUKE_A33R.pro | DAKANCTAESSTLPNKSDVLI TWLI DYVEDTWGSDGNPI TKTTSDYQSDVDSQEVRYKFC | 180 |



+ Majority

Majority

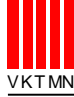

|                    |        |     |
|--------------------|--------|-----|
| ACAM2000_A33R.pro  | VKT MN | 185 |
| DPP9_A33R.pro      | VKT MN | 185 |
| DPP10_A33R.pro     | VKT MN | 185 |
| DPP11_A33R.pro     | VKT MN | 185 |
| DPP12_A33R.pro     | VKT MN | 185 |
| DPP13_A33R.pro     | VKT MN | 185 |
| DPP15_A33R.pro     | VKT MN | 185 |
| DPP16_A33R.pro     | VKT MN | 185 |
| DPP17_A33R.pro     | VKT MN | 185 |
| DPP19_A33R.pro     | VKT MN | 185 |
| DPP20_A33R.pro     | VKT MN | 185 |
| DPP21_A33R.pro     | VKT MN | 185 |
| CL3_A33R.pro       | VKT MN | 185 |
| VACV-3737_A33R.pro | VKT MN | 185 |
| VACV-DUKE_A33R.pro | VKT MN | 185 |

# O. B5R

+ Majority

Majority

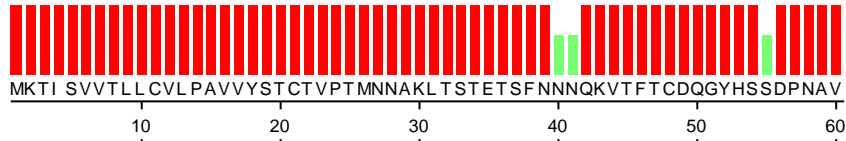

|                   |                                                                  |    |
|-------------------|------------------------------------------------------------------|----|
| ACAM2000_B5R.pro  | MKTI SVVTL LCVL PAVVYSTCTVPTMNNAKLTSTETSFNNDKQKVTFTCDQGYHSLDPNAV | 60 |
| DPP9_B5R.pro      | MKTI SVVTL LCVL PAVVYSTCTVPTMNNAKLTSTETSFNNDKQKVTFTCDQGYHSSDPNAV | 60 |
| DPP10_B5R.pro     | MKTI SVVTL LCVL PAVVYSTCTVPTMNNAKLTSTETSFNNDKQKVTFTCDQGYHSSDPNAV | 60 |
| DPP11_B5R.pro     | MKTI SVVTL LCVL PAVVYSTCTVPTMNNAKLTSTETSFNNDKQKVTFTCDQGYHSSDPNAV | 60 |
| DPP12_B5R.pro     | MKTI SVVTL LCVL PAVVYSTCTVPTMNNAKLTSTETSFNNDKQKVTFTCDQGYHSSDPNAV | 60 |
| DPP13_B5R.pro     | MKTI SVVTL LCVL PAVVYSTCTVPTMNNAKLTSTETSFNNDKQKVTFTCDQGYHSSDPNAV | 60 |
| DPP15_B5R.pro     | MKTI SVVTL LCVL PAVVYSTCTVPTMNNAKLTSTETSFNNDKQKVTFTCDQGYHSSDPNAV | 60 |
| DPP16_B5R.pro     | MKTI SVVTL LCVL PAVVYSTCTVPTMNNAKLTSTETSFNNDKQKVTFTCDQGYHSLDPNAV | 60 |
| DPP17_B5R.pro     | MKTI SVVTL LCVL PAVVYSTCTVPTMNNAKLTSTETSFNNDKQKVTFTCDQGYHSSDPNAV | 60 |
| DPP19_B5R.pro     | MKTI SVVTL LCVL PAVVYSTCTVPTMNNAKLTSTETSFNNDKQKVTFTCDQGYHSLDPNAV | 60 |
| DPP20_B5R.pro     | MKTI SVVTL LCVL PAVVYSTCTVPTMNNAKLTSTETSFNNDKQKVTFTCDQGYHSSDPNAV | 60 |
| DPP21_B5R.pro     | MKTI SVVTL LCVL PAVVYSTCTVPTMNNAKLTSTETSFNNDKQKVTFTCDQGYHSLDPNAV | 60 |
| CL3_B5R.pro       | MKTI SVVTL LCVL PAVVYSTCTVPTMNNAKLTSTETSFNNDKQKVTFTCDQGYHSLDPNAV | 60 |
| VACV-3737_B5R.pro | MKTI SVVTL LCVL PAVVYSTCTVPTMNNAKLTSTETSFNNDKQKVTFTCDQGYHSLDPNAV | 60 |
| VACV-DUKE_B5R.pro | MKTI SVVTL LCVL PAVVYSTCTVPTMNNAKLTSTETSFNNDKQKVTFTCDQGYHSSDPNAV | 60 |

+ Majority

Majority

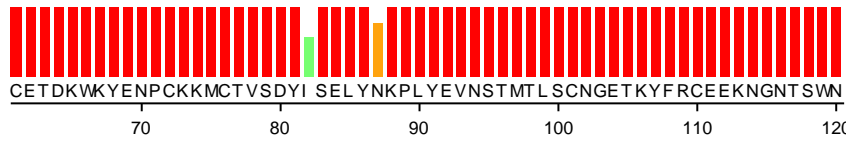

|                   |                                                               |     |
|-------------------|---------------------------------------------------------------|-----|
| ACAM2000_B5R.pro  | CETDKWKYENPCKKMCTVSDYI SELYNKPLYEVNSTMTLSCNGETKYFRCEEKNGNTSWN | 120 |
| DPP9_B5R.pro      | CETDKWKYENPCKKMCTVSDYI SELYNKPLYEVNSTMTLSCNGETKYFRCEEKNGNTSWN | 120 |
| DPP10_B5R.pro     | CETDKWKYENPCKKMCTVSDYI SELYDKPLYEVNSTMTLSCNGETKYFRCEEKNGNTSWN | 120 |
| DPP11_B5R.pro     | CETDKWKYENPCKKMCTVSDYI SELYNKPLYEVNSTMTLSCNGETKYFRCEEKNGNTSWN | 120 |
| DPP12_B5R.pro     | CETDKWKYENPCKKMCTVSDYI SELYNKPLYEVNSTMTLSCNGETKYFRCEEKNGNTSWN | 120 |
| DPP13_B5R.pro     | CETDKWKYENPCKKMCTVSDYI SELYNKPLYEVNSTMTLSCNGETKYFRCEEKNGNTSWN | 120 |
| DPP15_B5R.pro     | CETDKWKYENPCKKMCTVSDYI SELYNKPLYEVNSTMTLSCNGETKYFRCEEKNGNTSWN | 120 |
| DPP16_B5R.pro     | CETDKWKYENPCKKMCTVSDYI SELYNKPLYEVNSTMTLSCNGETKYFRCEEKNGNTSWN | 120 |
| DPP17_B5R.pro     | CETDKWKYENPCKKMCTVSDYI SELYNKPLYEVNSTMTLSCNGETKYFRCEEKNGNTSWN | 120 |
| DPP19_B5R.pro     | CETDKWKYENPCKKMCTVSDYI SELYDKPLYEVNSTMTLSCNGETKYFRCEEKNGNTSWN | 120 |
| DPP20_B5R.pro     | CETDKWKYENPCKKMCTVSDYI SELYNKPLYEVNSTMTLSCNGETKYFRCEEKNGNTSWN | 120 |
| DPP21_B5R.pro     | CETDKWKYENPCKKMCTVSDYI SELYNKPLYEVNSTMTLSCNGETKYFRCEEKNGNTSWN | 120 |
| CL3_B5R.pro       | CETDKWKYENPCKKMCTVSDYI SELYDKPLYEVNSTMTLSCNGETKYFRCEEKNGNTSWN | 120 |
| VACV-3737_B5R.pro | CETDKWKYENPCKKMCTVSDYI SELYNKPLYEVNSTMTLSCNGETKYFRCEEKNGNTSWN | 120 |
| VACV-DUKE_B5R.pro | CETDKWKYENPCKKMCTVSDYI SELYNKPLYEVNSTMTLSCNGETKYFRCEEKNGNTSWN | 120 |

+ Majority

Majority

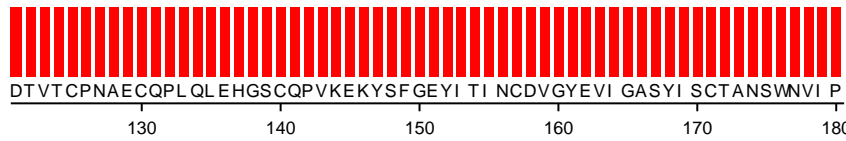

|                   |                                                                        |     |
|-------------------|------------------------------------------------------------------------|-----|
| ACAM2000_B5R.pro  | DTVT CPNAECQPL QLEHGSCQPVKEKYSFGEYI TINC DVG YEVI GAS YI SCTANSW NVI P | 180 |
| DPP9_B5R.pro      | DTVT CPNAECQPL QLEHGSCQPVKEKYSFGEYI TINC DVG YEVI GAS YI SCTANSW NVI P | 180 |
| DPP10_B5R.pro     | DTVT CPNAECQPL QLEHGSCQPVKEKYSFGEYI TINC DVG YEVI GAS YI SCTANSW NVI P | 180 |
| DPP11_B5R.pro     | DTVT CPNAECQPL QLEHGSCQPVKEKYSFGEYI TINC DVG YEVI GAS YI SCTANSW NVI P | 180 |
| DPP12_B5R.pro     | DTVT CPNAECQPL QLEHGSCQPVKEKYSFGEYI TINC DVG YEVI GAS YI SCTANSW NVI P | 180 |
| DPP13_B5R.pro     | DTVT CPNAECQPL QLEHGSCQPVKEKYSFGEYI TINC DVG YEVI GAS YI SCTANSW NVI P | 180 |
| DPP15_B5R.pro     | DTVT CPNAECQPL QLEHGSCQPVKEKYSFGEYI TINC DVG YEVI GAS YI SCTANSW NVI P | 180 |
| DPP16_B5R.pro     | DTVT CPNAECQPL QLEHGSCQPVKEKYSFGEYI TINC DVG YEVI GAS YI SCTANSW NVI P | 180 |
| DPP17_B5R.pro     | DTVT CPNAECQPL QLEHGSCQPVKEKYSFGEYI TINC DVG YEVI GAS YI SCTANSW NVI P | 180 |
| DPP19_B5R.pro     | DTVT CPNAECQPL QLEHGSCQPVKEKYSFGEYI TINC DVG YEVI GAS YI SCTANSW NVI P | 180 |
| DPP20_B5R.pro     | DTVT CPNAECQPL QLEHGSCQPVKEKYSFGEYI TINC DVG YEVI GAS YI SCTANSW NVI P | 180 |
| DPP21_B5R.pro     | DTVT CPNAECQPL QLEHGSCQPVKEKYSFGEYI TINC DVG YEVI GAS YI SCTANSW NVI P | 180 |
| CL3_B5R.pro       | DTVT CPNAECQPL QLEHGSCQPVKEKYSFGEYI TINC DVG YEVI GAS YI SCTANSW NVI P | 180 |
| VACV-3737_B5R.pro | DTVT CPNAECQPL QLEHGSCQPVKEKYSFGEYI TINC DVG YEVI GAS YI SCTANSW NVI P | 180 |
| VACV-DUKE_B5R.pro | DTVT CPNAECQPL QLEHGSCQPVKEKYSFGEYI TINC DVG YEVI GAS YI SCTANSW NVI P | 180 |

+ Majority

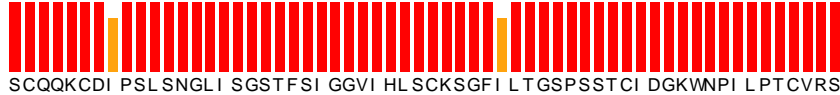

Majority

|                    |                                                                      |     |
|--------------------|----------------------------------------------------------------------|-----|
| ACAM2000_B5R.pro   | SCQQKCDI PSL SNGLI SGSTFSI GGVI HLSCKSGFI LTGSPSSTCI DGKWNPI LPTCVRS | 240 |
| DFF9_B5R.pro       | SCQQKCDI PSL SNGLI SGSTFSI GGVI HLSCKSGFI LTGSPSSTCI DGKWNPI LPTCVRS | 240 |
| DFF10_B5R.pro      | SCQQKCDI PSL SNGLI SGSTFSI GGVI HLSCKSGFI LTGSPSSTCI DGKWNPI LPTCVRS | 240 |
| DFF11_B5R.pro      | SCQQKCDMP SL SNGLI SGSTFSI GGVI HLSCKSGFI LTGSPSSTCI DGKWNPI LPTCVRS | 240 |
| DFF12_B5R.pro      | SCQQKCDI PSL SNGLI SGSTFSI GGVI HLSCKSGFI LTGSPSSTCI DGKWNPI LPTCVRS | 240 |
| DFF13_B5R.pro      | SCQQKCDI PSL SNGLI SGSTFSI GGVI HLSCKSGFI LTGSPSSTCI DGKWNPI LPTCVRS | 240 |
| DFF15_B5R.pro      | SCQQKCDMP SL SNGLI SGSTFSI GGVI HLSCKSGFI LTGSPSSTCI DGKWNPI LPTCVRS | 240 |
| DFF16_B5R.pro      | SCQQKCDI PSL SNGLI SGSTFSI GGVI HLSCKSGFI LTGSPSSTCI DGKWNPI LPTCVRS | 240 |
| DFF17_B5R.pro      | SCQQKCDI PSL SNGLI SGSTFSI GGVI HLSCKSGFI LTGSPSSTCI DGKWNPI LPTCVRS | 240 |
| DFF19_B5R.pro      | SCQQKCDI PSL SNGLI SGSTFSI GGVI HLSCKSGFI LTGSPSSTCI DGKWNPI LPTCVRS | 240 |
| DFF20_B5R.pro      | SCQQKCDI PSL SNGLI SGSTFSI GGVI HLSCKSGFI LTGSPSSTCI DGKWNPI LPTCVRS | 240 |
| DFF21_B5R.pro      | SCQQKCDI PSL SNGLI SGSTFSI GGVI HLSCKSGFI LTGSPSSTCI DGKWNPI LPTCVRS | 240 |
| CL3_B5R.pro        | SCQQKCDMP SL SNGLI SGSTFSI GGVI HLSCKSGFI LTGSPSSTCI DGKWNPI LPTCVRS | 240 |
| VACV -3737_B5R.pro | SCQQKCDI PSL SNGLI SGSTFSI GGVI HLSCKSGFI LTGSPSSTCI DGKWNPI LPTCVRS | 240 |
| VACV -DUKE_B5R.pro | SCQQKCDI PSL SNGLI SGSTFSI GGVI HLSCKSGFI LTGSPSSTCI DGKWNPI LPTCVRS | 240 |

+ Majority

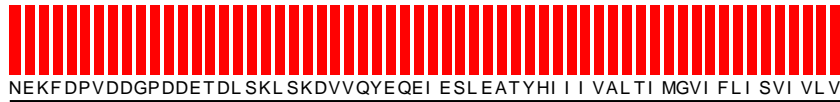

Majority

|                    |                                                                        |     |
|--------------------|------------------------------------------------------------------------|-----|
| ACAM2000_B5R.pro   | NEKFDPVDDGPDDETDL SKL SKDVVQYEQEI ESLEATYHI I I VALTI MGVI FLI SVI VLV | 300 |
| DFF9_B5R.pro       | NEKFDPVDDGPDDETDL SKL SKDVVQYEQEI ESLEATYHI I I VALTI MGVI FLI SVI VLV | 300 |
| DFF10_B5R.pro      | NEKFDPVDDGPDDETDL SKL SKDVVQYEQEI ESLEATYHI I I VALTI MGVI FLI SVI VLV | 300 |
| DFF11_B5R.pro      | NEKFDPVDDGPDDETDL SKL SKDVVQYEQEI ESLEATYHI I I VALTI MGVI FLI SVI VLV | 300 |
| DFF12_B5R.pro      | NEKFDPVDDGPDDETDL SKL SKDVVQYEQEI ESLEATYHI I I VALTI MGVI FLI SVI VLV | 300 |
| DFF13_B5R.pro      | NEKFDPVDDGPDDETDL SKL SKDVVQYEQEI ESLEATYHI I I VALTI MGVI FLI SVI VLV | 300 |
| DFF15_B5R.pro      | NEKFDPVDDGPDDETDL SKL SKDVVQYEQEI ESLEATYHI I I VALTI MGVI FLI SVI VLV | 300 |
| DFF16_B5R.pro      | NEKFDPVDDGPDDETDL SKL SKDVVQYEQEI ESLEATYHI I I VALTI MGVI FLI SVI VLV | 300 |
| DFF17_B5R.pro      | NEKFDPVDDGPDDETDL SKL SKDVVQYEQEI ESLEATYHI I I VALTI MGVI FLI SVI VLV | 300 |
| DFF19_B5R.pro      | NEKFDPVDDGPDDETDL SKL SKDVVQYEQEI ESLEATYHI I I VALTI MGVI FLI SVI VLV | 300 |
| DFF20_B5R.pro      | NEKFDPVDDGPDDETDL SKL SKDVVQYEQEI ESLEATYHI I I VALTI MGVI FLI SVI VLV | 300 |
| DFF21_B5R.pro      | NEKFDPVDDGPDDETDL SKL SKDVVQYEQEI ESLEATYHI I I VALTI MGVI FLI SVI VLV | 300 |
| CL3_B5R.pro        | NEKFDPVDDGPDDETDL SKL SKDVVQYEQEI ESLEATYHI I I VALTI MGVI FLI SVI VLV | 300 |
| VACV -3737_B5R.pro | NEKFDPVDDGPDDETDL SKL SKDVVQYEQEI ESLEATYHI I I VALTI MGVI FLI SVI VLV | 300 |
| VACV -DUKE_B5R.pro | NEKFDPVDDGPDDETDL SKL SKDVVQYEQEI ESLEATYHI I I VALTI MGVI FLI SVI VLV | 300 |

+ Majority

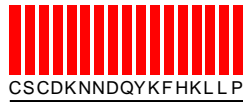

Majority

|                    |                   |     |
|--------------------|-------------------|-----|
| ACAM2000_B5R.pro   | CSCDKNNDQYKFHKLLP | 317 |
| DFF9_B5R.pro       | CSCDKNNDQYKFHKLLP | 317 |
| DFF10_B5R.pro      | CSCDKNNDQYKFHKLLP | 317 |
| DFF11_B5R.pro      | CSCDKNNDQYKFHKLLP | 317 |
| DFF12_B5R.pro      | CSCDKNNDQYKFHKLLP | 317 |
| DFF13_B5R.pro      | CSCDKNNDQYKFHKLLP | 317 |
| DFF15_B5R.pro      | CSCDKNNDQYKFHKLLP | 317 |
| DFF16_B5R.pro      | CSCDKNNDQYKFHKLLP | 317 |
| DFF17_B5R.pro      | CSCDKNNDQYKFHKLLP | 317 |
| DFF19_B5R.pro      | CSCDKNNDQYKFHKLLP | 317 |
| DFF20_B5R.pro      | CSCDKNNDQYKFHKLLP | 317 |
| DFF21_B5R.pro      | CSCDKNNDQYKFHKLLP | 317 |
| CL3_B5R.pro        | CSCDKNNDQYKFHKLLP | 317 |
| VACV -3737_B5R.pro | CSCDKNNDQYKFHKLLP | 317 |
| VACV -DUKE_B5R.pro | CSCDKNNDQYKFHKLLP | 317 |

# P. C21/B27R

+ Majority

Majority

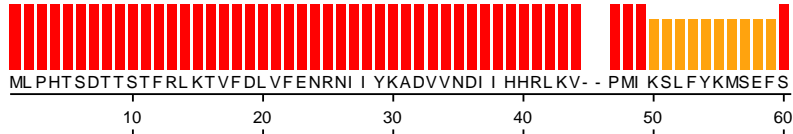

ACAM2000\_C21/B27R.pro  
 DPP9\_C21/B27R.pro  
 DPP10\_C21/B27R.pro  
 DPP11\_C21/B27R.pro  
 DPP12\_C21/B27R.pro  
 DPP13\_C21/B27R.pro  
 DPP15\_C21/B27R.pro  
 DPP16\_C21/B27R.pro  
 DPP17\_C21/B27R.pro  
 DPP19\_C21/B27R.pro  
 DPP20\_C21/B27R.pro  
 DPP21\_C21/B27R.pro  
 CL3\_C21/B27R.pro  
 VACV-3737\_C21/B27R.pro  
 VACV-DUKE\_C21/B27R.pro

ML PHTSDTTSTFRLKT VFDL VFENRNI | YKADVNDI | HHRLKV - - PMI KSLFYKMSEFS 58  
 ML PHTSDTTSTFRLKT VFDL VFENRNI | YKADVNDI | HHRLKV - - PMI KSLFYKMSEFS 58  
 ML PHTSDTTSTFRLKT VFDL VFENRNI | YKADVNDI | HHRLKV - - PMI LQDVRI L - - S 55  
 ML PHTSDTTSTFRLKT VFDL VFENRNI | YKADVNDI | HHRLKV - - PMI LQDVRI L - - S 55  
 ML PHTSDTTSTFRLKT VFDL VFENRNI | YKADVNDI | HHRLKV - - PMI KSLFYKMSEFS 58  
 ML PHTSDTTSTFRLKT VFDL VFENRNI | YKADVNDI | HHRLKV - - PMI KSLFYKMSEFS 58  
 ML PHTSDTTSTFRLKT VFDL VFENRNI | YKADVNDI | HHRLKV - - PMI KSLFYKMSEFS 58  
 ML PHTSDTTSTFRLKT VFDL VFENRNI | YKADVNDI | HHRLKV - - PMI KSLFYKMSEFS 58  
 ML PHTSDTTSTFRLKT VFDL VFENRNI | YKADVNDI | HHRLKV - - PMI KSLFYKMSEFS 58  
 ML PHTSDTTSTFRLKT VFDL VFENRNI | YKADVNDI | HHRLKV - - PMI KSLFYKMSEFS 58  
 ML PHTSDTTSTFRLKT VFDL VFENRNI | YKADVNDI | HHRLKV - - PMI KSLFYKMSEFS 58  
 ML PHTSDTTSTFRLKT VFDL VFENRNI | YKADVNDI | HHRLKV - - PMI KSLFYKMSEFS 58  
 ML PHTSDTTSTFRLKT VFDL VFENRNI | YKADVNDI | HHRLKVSLPMI KSLFYKMSEFS 60  
 ML PHTSDTTSTFRLKT VFDL VFENRNI | YKADVNDI | HHRLKV - - PMI KSLFYKMSEFS 58

+ Majority

Majority

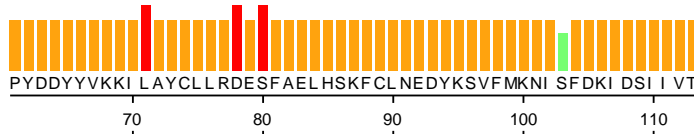

ACAM2000\_C21/B27R.pro  
 DPP9\_C21/B27R.pro  
 DPP10\_C21/B27R.pro  
 DPP11\_C21/B27R.pro  
 DPP12\_C21/B27R.pro  
 DPP13\_C21/B27R.pro  
 DPP15\_C21/B27R.pro  
 DPP16\_C21/B27R.pro  
 DPP17\_C21/B27R.pro  
 DPP19\_C21/B27R.pro  
 DPP20\_C21/B27R.pro  
 DPP21\_C21/B27R.pro  
 CL3\_C21/B27R.pro  
 VACV-3737\_C21/B27R.pro  
 VACV-DUKE\_C21/B27R.pro

PYDDYYVKKI LAYCLLRDESFAELHSKFCLNEDYKSVFMKNI SFDKI DSI I VT 111  
 PYDDYYVKKI LAYCLLRDESFAELHSKFCLNEDYKSVFMKNI SFDKI DSI I VT 111  
 - - - - - LRRLLR - - - KKDTSLLLI KGR - - - - - VI RGTT 79  
 - - - - - LRRLLR - - - KKDTSLLP I KGR - - - - - VI RGTT 79  
 PYDDYYVKKI LAYCLLRDESFAELHSKFCLNEDYKSVFMKNI LFDKI DSI I VT 111  
 PYDDYYVKKI LAYCLLRDESFAELHSKFCLNEDYKSVFMKNI SFDKI DSI I VT 111  
 PYDDYYVKKI LAYCLLRDESFAELHSKFCLNEDYKSVFMKNI LFDKI DSI I VT 111  
 PYDDYYVKKI LAYCLLRDESFAELHSKFCLNEDYKSVFMKNI SFDKI DSI I VT 113  
 PYDDYYVKKI LAYCLLRDESFAELHSKFCLNEDYKSVFMKNI SFDKI DSI I VT 111

## Q. D13L

+ Majority

Majority

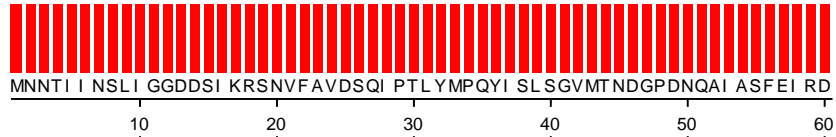

|                    |                                                                        |    |
|--------------------|------------------------------------------------------------------------|----|
| ACAM2000_D13L.pro  | MNNTI I NSLI GGDDSI KRSNVFAVDSQI PTL YMPQYI SL SGVMTNDGPDNQAI ASFEI RD | 60 |
| DFF9_D13L.pro      | MNNTI I NSLI GGDDSI KRSNVFAVDSQI PTL YMPQYI SL SGVMTNDGPDNQAI ASFEI RD | 60 |
| DFF10_D13L.pro     | MNNTI I NSLI GGDDSI KRSNVFAVDSQI PTL YMPQYI SL SGVMTNDGPDNQAI ASFEI RD | 60 |
| DFF11_D13L.pro     | MNNTI I NSLI GGDDSI KRSNVFAVDSQI PTL YMPQYI SL SGVMTNDGPDNQAI ASFEI RD | 60 |
| DFF12_D13L.pro     | MNNTI I NSLI GGDDSI KRSNVFAVDSQI PTL YMPQYI SL SGVMTNDGPDNQAI ASFEI RD | 60 |
| DFF13_D13L.pro     | MNNTI I NSLI GGDDSI KRSNVFAVDSQI PTL YMPQYI SL SGVMTNDGPDNQAI ASFEI RD | 60 |
| DFF15_D13L.pro     | MNNTI I NSLI GGDDSI KRSNVFAVDSQI PTL YMPQYI SL SGVMTNDGPDNQAI ASFEI RD | 60 |
| DFF16_D13L.pro     | MNNTI I NSLI GGDDSI KRSNVFAVDSQI PTL YMPQYI SL SGVMTNDGPDNQAI ASFEI RD | 60 |
| DFF17_D13L.pro     | MNNTI I NSLI GGDDSI KRSNVFAVDSQI PTL YMPQYI SL SGVMTNDGPDNQAI ASFEI RD | 60 |
| DFF19_D13L.pro     | MNNTI I NSLI GGDDSI KRSNVFAVDSQI PTL YMPQYI SL SGVMTNDGPDNQAI ASFEI RD | 60 |
| DFF20_D13L.pro     | MNNTI I NSLI GGDDSI KRSNVFAVDSQI PTL YMPQYI SL SGVMTNDGPDNQAI ASFEI RD | 60 |
| DFF21_D13L.pro     | MNNTI I NSLI GGDDSI KRSNVFAVDSQI PTL YMPQYI SL SGVMTNDGPDNQAI ASFEI RD | 60 |
| CL3_D13L.pro       | MNNTI I NSLI GGDDSI KRSNVFAVDSQI PTL YMPQYI SL SGVMTNDGPDNQAI ASFEI RD | 60 |
| VACV-3737_D13L.pro | MNNTI I NSLI GGDDSI KRSNVFAVDSQI PTL YMPQYI SL SGVMTNDGPDNQAI ASFEI RD | 60 |
| VACV-DUKE_D13L.pro | MNNTI I NSLI GGDDSI KRSNVFAVDSQI PTL YMPQYI SL SGVMTNDGPDNQAI ASFEI RD | 60 |

+ Majority

Majority

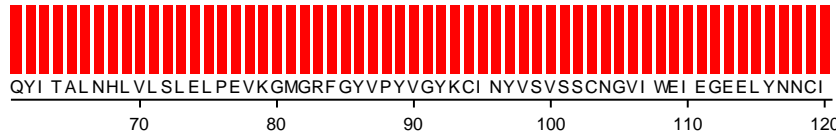

|                    |                                                                  |     |
|--------------------|------------------------------------------------------------------|-----|
| ACAM2000_D13L.pro  | QYI TALNHLVL SLELPEVKGMRFGYVPYVGYKCI NYVSVSSCNGVI WEI EGEELYNNCI | 120 |
| DFF9_D13L.pro      | QYI TALNHLVL SLELPEVKGMRFGYVPYVGYKCI NYVSVSSCNGVI WEI EGEELYNNCI | 120 |
| DFF10_D13L.pro     | QYI TALNHLVL SLELPEVKGMRFGYVPYVGYKCI NYVSVSSCNGVI WEI EGEELYNNCI | 120 |
| DFF11_D13L.pro     | QYI TALNHLVL SLELPEVKGMRFGYVPYVGYKCI NYVSVSSCNGVI WEI EGEELYNNCI | 120 |
| DFF12_D13L.pro     | QYI TALNHLVL SLELPEVKGMRFGYVPYVGYKCI NYVSVSSCNGVI WEI EGEELYNNCI | 120 |
| DFF13_D13L.pro     | QYI TALNHLVL SLELPEVKGMRFGYVPYVGYKCI NYVSVSSCNGVI WEI EGEELYNNCI | 120 |
| DFF15_D13L.pro     | QYI TALNHLVL SLELPEVKGMRFGYVPYVGYKCI NYVSVSSCNGVI WEI EGEELYNNCI | 120 |
| DFF16_D13L.pro     | QYI TALNHLVL SLELPEVKGMRFGYVPYVGYKCI NYVSVSSCNGVI WEI EGEELYNNCI | 120 |
| DFF17_D13L.pro     | QYI TALNHLVL SLELPEVKGMRFGYVPYVGYKCI NYVSVSSCNGVI WEI EGEELYNNCI | 120 |
| DFF19_D13L.pro     | QYI TALNHLVL SLELPEVKGMRFGYVPYVGYKCI NYVSVSSCNGVI WEI EGEELYNNCI | 120 |
| DFF20_D13L.pro     | QYI TALNHLVL SLELPEVKGMRFGYVPYVGYKCI NYVSVSSCNGVI WEI EGEELYNNCI | 120 |
| DFF21_D13L.pro     | QYI TALNHLVL SLELPEVKGMRFGYVPYVGYKCI NYVSVSSCNGVI WEI EGEELYNNCI | 120 |
| CL3_D13L.pro       | QYI TALNHLVL SLELPEVKGMRFGYVPYVGYKCI NYVSVSSCNGVI WEI EGEELYNNCI | 120 |
| VACV-3737_D13L.pro | QYI TALNHLVL SLELPEVKGMRFGYVPYVGYKCI NYVSVSSCNGVI WEI EGEELYNNCI | 120 |
| VACV-DUKE_D13L.pro | QYI TALNHLVL SLELPEVKGMRFGYVPYVGYKCI NYVSVSSCNGVI WEI EGEELYNNCI | 120 |

+ Majority

Majority

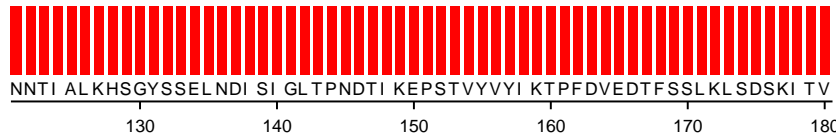

|                    |                                                                     |     |
|--------------------|---------------------------------------------------------------------|-----|
| ACAM2000_D13L.pro  | NNTI ALKHSGYSSELNDI SI GLTPNDTI KEPSTVYVYI KTFDFVEDTFSSSLKLSDSKI TV | 180 |
| DFF9_D13L.pro      | NNTI ALKHSGYSSELNDI SI GLTPNDTI KEPSTVYVYI KTFDFVEDTFSSSLKLSDSKI TV | 180 |
| DFF10_D13L.pro     | NNTI ALKHSGYSSELNDI SI GLTPNDTI KEPSTVYVYI KTFDFVEDTFSSSLKLSDSKI TV | 180 |
| DFF11_D13L.pro     | NNTI ALKHSGYSSELNDI SI GLTPNDTI KEPSTVYVYI KTFDFVEDTFSSSLKLSDSKI TV | 180 |
| DFF12_D13L.pro     | NNTI ALKHSGYSSELNDI SI GLTPNDTI KEPSTVYVYI KTFDFVEDTFSSSLKLSDSKI TV | 180 |
| DFF13_D13L.pro     | NNTI ALKHSGYSSELNDI SI GLTPNDTI KEPSTVYVYI KTFDFVEDTFSSSLKLSDSKI TV | 180 |
| DFF15_D13L.pro     | NNTI ALKHSGYSSELNDI SI GLTPNDTI KEPSTVYVYI KTFDFVEDTFSSSLKLSDSKI TV | 180 |
| DFF16_D13L.pro     | NNTI ALKHSGYSSELNDI SI GLTPNDTI KEPSTVYVYI KTFDFVEDTFSSSLKLSDSKI TV | 180 |
| DFF17_D13L.pro     | NNTI ALKHSGYSSELNDI SI GLTPNDTI KEPSTVYVYI KTFDFVEDTFSSSLKLSDSKI TV | 180 |
| DFF19_D13L.pro     | NNTI ALKHSGYSSELNDI SI GLTPNDTI KEPSTVYVYI KTFDFVEDTFSSSLKLSDSKI TV | 180 |
| DFF20_D13L.pro     | NNTI ALKHSGYSSELNDI SI GLTPNDTI KEPSTVYVYI KTFDFVEDTFSSSLKLSDSKI TV | 180 |
| DFF21_D13L.pro     | NNTI ALKHSGYSSELNDI SI GLTPNDTI KEPSTVYVYI KTFDFVEDTFSSSLKLSDSKI TV | 180 |
| CL3_D13L.pro       | NNTI ALKHSGYSSELNDI SI GLTPNDTI KEPSTVYVYI KTFDFVEDTFSSSLKLSDSKI TV | 180 |
| VACV-3737_D13L.pro | NNTI ALKHSGYSSELNDI SI GLTPNDTI KEPSTVYVYI KTFDFVEDTFSSSLKLSDSKI TV | 180 |
| VACV-DUKE_D13L.pro | NNTI ALKHSGYSSELNDI SI GLTPNDTI KEPSTVYVYI KTFDFVEDTFSSSLKLSDSKI TV | 180 |

+ Majority



Majority

TVTFNPVSDI VI RDSSFD FETFNKEFVYVPELSFI GYMVKNVQI KPSFI EKPRRVI GQI N  
 190 200 210 220 230 240

|                    |                                                                      |     |
|--------------------|----------------------------------------------------------------------|-----|
| ACAM2000_D13L.pro  | TVTFNPVSDI VI RDSSFD FETFNKEFVYVPELSFI GYMVKNVQI KPSFI EKPRRVI GQI N | 240 |
| DPP9_D13L.pro      | TVTFNPVSDI VI RDSSFD FETFNKEFVYVPELSFI GYMVKNVQI KPSFI EKPRRVI GQI N | 240 |
| DPP10_D13L.pro     | TVTFNPVSDI VI RDSSFD FETFNKEFVYVPELSFI GYMVKNVQI KPSFI EKPRRVI GQI N | 240 |
| DPP11_D13L.pro     | TVTFNPVSDI VI RDSSFD FETFNKEFVYVPELSFI GYMVKNVQI KPSFI EKPRRVI GQI N | 240 |
| DPP12_D13L.pro     | TVTFNPVSDI VI RDSSFD FETFNKEFVYVPELSFI GYMVKNVQI KPSFI EKPRRVI GQI N | 240 |
| DPP13_D13L.pro     | TVTFNPVSDI VI RDSSFD FETFNKEFVYVPELSFI GYMVKNVQI KPSFI EKPRRVI GQI N | 240 |
| DPP15_D13L.pro     | TVTFNPVSDI VI RDSSFD FETFNKEFVYVPELSFI GYMVKNVQI KPSFI EKPRRVI GQI N | 240 |
| DPP16_D13L.pro     | TVTFNPVSDI VI RDSSFD FETFNKEFVYVPELSFI GYMVKNVQI KPSFI EKPRRVI GQI N | 240 |
| DPP17_D13L.pro     | TVTFNPVSDI VI RDSSFD FETFNKEFVYVPELSFI GYMVKNVQI KPSFI EKPRRVI GQI N | 240 |
| DPP19_D13L.pro     | TVTFNPVSDI VI RDSSFD FETFNKEFVYVPELSFI GYMVKNVQI KPSFI EKPRRVI GQI N | 240 |
| DPP20_D13L.pro     | TVTFNPVSDI VI RDSSFD FETFNKEFVYVPELSFI GYMVKNVQI KPSFI EKPRRVI GQI N | 240 |
| DPP21_D13L.pro     | TVTFNPVSDI VI RDSSFD FETFNKEFVYVPELSFI GYMVKNVQI KPSFI EKPRRVI GQI N | 240 |
| CL3_D13L.pro       | TVTFNPVSDI VI RDSSFD FETFNKEFVYVPELSFI GYMVKNVQI KPSFI EKPRRVI GQI N | 240 |
| VACV-3737_D13L.pro | TVTFNPVSDI VI RDSSFD FETFNKEFVYVPELSFI GYMVKNVQI KPSFI EKPRRVI GQI N | 240 |
| VACV-DUKE_D13L.pro | TVTFNPVSDI VI RDSSFD FETFNKEFVYVPELSFI GYMVKNVQI KPSFI EKPRRVI GQI N | 240 |

+ Majority



Majority

QPTATVTEVHAATSLSVYTKPYYGNTDNKFI SYPGYSQDEKDYI DAYVSRLDDDLVI VSD  
 250 260 270 280 290 300

|                    |                                                                 |     |
|--------------------|-----------------------------------------------------------------|-----|
| ACAM2000_D13L.pro  | QPTATVTEVHAATSLSVYTKPYYGNTDNKFI SYPGYSQDEKDYI DAYVSRLDDDLVI VSD | 300 |
| DPP9_D13L.pro      | QPTATVTEVHAATSLSVYTKPYYGNTDNKFI SYPGYSQDEKDYI DAYVSRLDDDLVI VSD | 300 |
| DPP10_D13L.pro     | QPTATVTEVHAATSLSVYTKPYYGNTDNKFI SYPGYSQDEKDYI DAYVSRLDDDLVI VSD | 300 |
| DPP11_D13L.pro     | QPTATVTEVHAATSLSVYTKPYYGNTDNKFI SYPGYSQDEKDYI DAYVSRLDDDLVI VSD | 300 |
| DPP12_D13L.pro     | QPTATVTEVHAATSLSVYTKPYYGNTDNKFI SYPGYSQDEKDYI DAYVSRLDDDLVI VSD | 300 |
| DPP13_D13L.pro     | QPTATVTEVHAATSLSVYTKPYYGNTDNKFI SYPGYSQDEKDYI DAYVSRLDDDLVI VSD | 300 |
| DPP15_D13L.pro     | QPTATVTEVHAATSLSVYTKPYYGNTDNKFI SYPGYSQDEKDYI DAYVSRLDDDLVI VSD | 300 |
| DPP16_D13L.pro     | QPTATVTEVHAATSLSVYTKPYYGNTDNKFI SYPGYSQDEKDYI DAYVSRLDDDLVI VSD | 300 |
| DPP17_D13L.pro     | QPTATVTEVHAATSLSVYTKPYYGNTDNKFI SYPGYSQDEKDYI DAYVSRLDDDLVI VSD | 300 |
| DPP19_D13L.pro     | QPTATVTEVHAATSLSVYTKPYYGNTDNKFI SYPGYSQDEKDYI DAYVSRLDDDLVI VSD | 300 |
| DPP20_D13L.pro     | QPTATVTEVHAATSLSVYTKPYYGNTDNKFI SYPGYSQDEKDYI DAYVSRLDDDLVI VSD | 300 |
| DPP21_D13L.pro     | QPTATVTEVHAATSLSVYTKPYYGNTDNKFI SYPGYSQDEKDYI DAYVSRLDDDLVI VSD | 300 |
| CL3_D13L.pro       | QPTATVTEVHAATSLSVYTKPYYGNTDNKFI SYPGYSQDEKDYI DAYVSRLDDDLVI VSD | 300 |
| VACV-3737_D13L.pro | QPTATVTEVHAATSLSVYTKPYYGNTDNKFI SYPGYSQDEKDYI DAYVSRLDDDLVI VSD | 300 |
| VACV-DUKE_D13L.pro | QPTATVTEVHAATSLSVYTKPYYGNTDNKFI SYPGYSQDEKDYI DAYVSRLDDDLVI VSD | 300 |

+ Majority



Majority

GPPTGYPESAIEI VEPEDGI VSI QDADVYVKI DNVDPNMSVYLHTNLLMFGTRKNSFI YN  
 310 320 330 340 350 360

|                    |                                                                   |     |
|--------------------|-------------------------------------------------------------------|-----|
| ACAM2000_D13L.pro  | GPPTGYPESAIEI VEPEDGI VSI QDADVYVKI DNVDPNMSVYLHTNLLMFGTRKNSFI YN | 360 |
| DPP9_D13L.pro      | GPPTGYPESAIEI VEPEDGI VSI QDADVYVKI DNVDPNMSVYLHTNLLMFGTRKNSFI YN | 360 |
| DPP10_D13L.pro     | GPPTGYPESAIEI VEPEDGI VSI QDADVYVKI DNVDPNMSVYLHTNLLMFGTRKNSFI YN | 360 |
| DPP11_D13L.pro     | GPPTGYPESAIEI VEPEDGI VSI QDADVYVKI DNVDPNMSVYLHTNLLMFGTRKNSFI YN | 360 |
| DPP12_D13L.pro     | GPPTGYPESAIEI VEPEDGI VSI QDADVYVKI DNVDPNMSVYLHTNLLMFGTRKNSFI YN | 360 |
| DPP13_D13L.pro     | GPPTGYPESAIEI VEPEDGI VSI QDADVYVKI DNVDPNMSVYLHTNLLMFGTRKNSFI YN | 360 |
| DPP15_D13L.pro     | GPPTGYPESAIEI VEPEDGI VSI QDADVYVKI DNVDPNMSVYLHTNLLMFGTRKNSFI YN | 360 |
| DPP16_D13L.pro     | GPPTGYPESAIEI VEPEDGI VSI QDADVYVKI DNVDPNMSVYLHTNLLMFGTRKNSFI YN | 360 |
| DPP17_D13L.pro     | GPPTGYPESAIEI VEPEDGI VSI QDADVYVKI DNVDPNMSVYLHTNLLMFGTRKNSFI YN | 360 |
| DPP19_D13L.pro     | GPPTGYPESAIEI VEPEDGI VSI QDADVYVKI DNVDPNMSVYLHTNLLMFGTRKNSFI YN | 360 |
| DPP20_D13L.pro     | GPPTGYPESAIEI VEPEDGI VSI QDADVYVKI DNVDPNMSVYLHTNLLMFGTRKNSFI YN | 360 |
| DPP21_D13L.pro     | GPPTGYPESAIEI VEPEDGI VSI QDADVYVKI DNVDPNMSVYLHTNLLMFGTRKNSFI YN | 360 |
| CL3_D13L.pro       | GPPTGYPESAIEI VEPEDGI VSI QDADVYVKI DNVDPNMSVYLHTNLLMFGTRKNSFI YN | 360 |
| VACV-3737_D13L.pro | GPPTGYPESAIEI VEPEDGI VSI QDADVYVKI DNVDPNMSVYLHTNLLMFGTRKNSFI YN | 360 |
| VACV-DUKE_D13L.pro | GPPTGYPESAIEI VEPEDGI VSI QDADVYVKI DNVDPNMSVYLHTNLLMFGTRKNSFI YN | 360 |

+ Majority

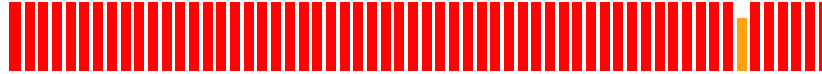

Majority

I SKKFSAI TGTYS DATKRTI FAHI SHSI NI | DTSI PVSLWTSQRNVYNGDNRSAESKAKD  
 370 380 390 400 410 420

|                    |                                                                        |     |
|--------------------|------------------------------------------------------------------------|-----|
| ACAM2000_D13L.pro  | I SKKFSAI TGTYS DATKRTI FAHI SHSI NI   DTSI PVSLWTSQRNVYNGDNRSAESKAKD  | 420 |
| DPP9_D13L.pro      | I SKKFSAI TGTYS DATKRTI FAHI SHSI NI   DTSI PVSLWTSQRNVYNGDNRSAESKAKD  | 420 |
| DPP10_D13L.pro     | I SKKFSAI TGTYS DATKRTI FAHI SHSI NI   DTSI PVSLWTSQRNVYNGDNRSAESKAKD  | 420 |
| DPP11_D13L.pro     | I SKKFSAI TGTYS DATKRTI FAHI SHSI NI   DTSI PVSLWTSQRNVYNGDNRSAESKAKD  | 420 |
| DPP12_D13L.pro     | I SKKFSAI TGTYS DATKRTI FAHI SHSI NI   DTSI PVSLWTSQRNVYNGDNRSAESKAKD  | 420 |
| DPP13_D13L.pro     | I SKKFSAI TGTYS DATKRTI FAHI SHSI NI   DTSI PVSLWTSQRNVYNGDNRSAESKAKD  | 420 |
| DPP15_D13L.pro     | I SKKFSAI TGTYS DATKRTI FAHI SHSI NI   DTSI PVSLWTSQRNVYNGDNRSAESKAKD  | 420 |
| DPP16_D13L.pro     | I SKKFSAI TGTYS DATKRTI FAHI SHSI NI   DTSI PVSLWTSQRNVYNGDNRSAESKAKD  | 420 |
| DPP17_D13L.pro     | I SKKFSAI TGTYS DATKRTI FAHI SHSI NI   DTSI PVSLWTSQRNVYNGDNRSAESKAKD  | 420 |
| DPP19_D13L.pro     | I SKKFSAI TGTYS DATKRTI FAHI SHSI NI   DTSI PVSLWTSQRNVYNGDNRS TESKAKD | 420 |
| DPP20_D13L.pro     | I SKKFSAI TGTYS DATKRTI FAHI SHSI NI   DTSI PVSLWTSQRNVYNGDNRSAESKAKD  | 420 |
| DPP21_D13L.pro     | I SKKFSAI TGTYS DATKRTI FAHI SHSI NI   DTSI PVSLWTSQRNVYNGDNRSAESKAKD  | 420 |
| CL3_D13L.pro       | I SKKFSAI TGTYS DATKRTI FAHI SHSI NI   DTSI PVSLWTSQRNVYNGDNRSAESKAKD  | 420 |
| VACV-3737_D13L.pro | I SKKFSAI TGTYS DATKRTI FAHI SHSI NI   DTSI PVSLWTSQRNVYNGDNRSAESKAKD  | 420 |
| VACV-DUKE_D13L.pro | I SKKFSAI TGTYS DATKRTI FAHI SHSI NI   DTSI PVSLWTSQRNVYNGDNRSAESKAKD  | 420 |

+ Majority



Majority

LFI NDPFI KGI DFKNKTDI | SRLEVRFGNDVLYSENGPI SRI YNELLT KSNNGTRTLTFN  
 430 440 450 460 470 480

|                    |                                                                      |     |
|--------------------|----------------------------------------------------------------------|-----|
| ACAM2000_D13L.pro  | LFI NDPFI KGI DFKNKTDI   SRLEVRFGNDVLYSENGPI SRI YNELLT KSNNGTRTLTFN | 480 |
| DPP9_D13L.pro      | LFI NDPFI KGI DFKNKTDI   SRLEVRFGNDVLYSENGPI SRI YNELLT KSNNGTRTLTFN | 480 |
| DPP10_D13L.pro     | LFI NDPFI KGI DFKNKTDI   SRLEVRFGNDVLYSENGPI SRI YNELLT KSNNGTRTLTFN | 480 |
| DPP11_D13L.pro     | LFI NDPFI KGI DFKNKTDI   SRLEVRFGNDVLYSENGPI SRI YNELLT KSNNGTRTLTFN | 480 |
| DPP12_D13L.pro     | LFI NDPFI KGI DFKNKTDI   SRLEVRFGNDVLYSENGPI SRI YNELLT KSNNGTRTLTFN | 480 |
| DPP13_D13L.pro     | LFI NDPFI KGI DFKNKTDI   SRLEVRFGNDVLYSENGPI SRI YNELLT KSNNGTRTLTFN | 480 |
| DPP15_D13L.pro     | LFI NDPFI KGI DFKNKTDI   SRLEVRFGNDVLYSENGPI SRI YNELLT KSNNGTRTLTFN | 480 |
| DPP16_D13L.pro     | LFI NDPFI KGI DFKNKTDI   SRLEVRFGNDVLYSENGPI SRI YNELLT KSNNGTRTLTFN | 480 |
| DPP17_D13L.pro     | LFI NDPFI KGI DFKNKTDI   SRLEVRFGNDVLYSENGPI SRI YNELLT KSNNGTRTLTFN | 480 |
| DPP19_D13L.pro     | LFI NDPFI KGI DFKNKTDI   SRLEVRFGNDVLYSENGPI SRI YNELLT KSNNGTRTLTFN | 480 |
| DPP20_D13L.pro     | LFI NDPFI KGI DFKNKTDI   SRLEVRFGNDVLYSENGPI SRI YNELLT KSNNGTRTLTFN | 480 |
| DPP21_D13L.pro     | LFI NDPFI KGI DFKNKTDI   SRLEVRFGNDVLYSENGPI SRI YNELLT KSNNGTRTLTFN | 480 |
| CL3_D13L.pro       | LFI NDPFI KGI DFKNKTDI   SRLEVRFGNDVLYSENGPI SRI YNELLT KSNNGTRTLTFN | 480 |
| VACV-3737_D13L.pro | LFI NDPFI KGI DFKNKTDI   SRLEVRFGNDVLYSENGPI SRI YNELLT KSNNGTRTLTFN | 480 |
| VACV-DUKE_D13L.pro | LFI NDPFI KGI DFKNKTDI   SRLEVRFGNDVLYSENGPI SRI YNELLT KSNNGTRTLTFN | 480 |

+ Majority

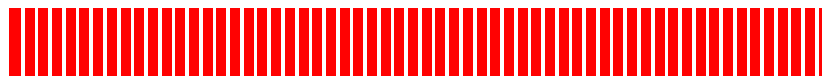

Majority

FTP KI FFRPTTI TANVSRGKDKL SVRVVYSTMDVNHP I YVYQKQL VVVCNDL YKVS YDQG  
 490 500 510 520 530 540

|                    |                                                                       |     |
|--------------------|-----------------------------------------------------------------------|-----|
| ACAM2000_D13L.pro  | FTP KI FFRPTTI TANVSRGKDKL SVRVVYSTMDVNHP I YVYQKQL VVVCNDL YKVS YDQG | 540 |
| DPP9_D13L.pro      | FTP KI FFRPTTI TANVSRGKDKL SVRVVYSTMDVNHP I YVYQKQL VVVCNDL YKVS YDQG | 540 |
| DPP10_D13L.pro     | FTP KI FFRPTTI TANVSRGKDKL SVRVVYSTMDVNHP I YVYQKQL VVVCNDL YKVS YDQG | 540 |
| DPP11_D13L.pro     | FTP KI FFRPTTI TANVSRGKDKL SVRVVYSTMDVNHP I YVYQKQL VVVCNDL YKVS YDQG | 540 |
| DPP12_D13L.pro     | FTP KI FFRPTTI TANVSRGKDKL SVRVVYSTMDVNHP I YVYQKQL VVVCNDL YKVS YDQG | 540 |
| DPP13_D13L.pro     | FTP KI FFRPTTI TANVSRGKDKL SVRVVYSTMDVNHP I YVYQKQL VVVCNDL YKVS YDQG | 540 |
| DPP15_D13L.pro     | FTP KI FFRPTTI TANVSRGKDKL SVRVVYSTMDVNHP I YVYQKQL VVVCNDL YKVS YDQG | 540 |
| DPP16_D13L.pro     | FTP KI FFRPTTI TANVSRGKDKL SVRVVYSTMDVNHP I YVYQKQL VVVCNDL YKVS YDQG | 540 |
| DPP17_D13L.pro     | FTP KI FFRPTTI TANVSRGKDKL SVRVVYSTMDVNHP I YVYQKQL VVVCNDL YKVS YDQG | 540 |
| DPP19_D13L.pro     | FTP KI FFRPTTI TANVSRGKDKL SVRVVYSTMDVNHP I YVYQKQL VVVCNDL YKVS YDQG | 540 |
| DPP20_D13L.pro     | FTP KI FFRPTTI TANVSRGKDKL SVRVVYSTMDVNHP I YVYQKQL VVVCNDL YKVS YDQG | 540 |
| DPP21_D13L.pro     | FTP KI FFRPTTI TANVSRGKDKL SVRVVYSTMDVNHP I YVYQKQL VVVCNDL YKVS YDQG | 540 |
| CL3_D13L.pro       | FTP KI FFRPTTI TANVSRGKDKL SVRVVYSTMDVNHP I YVYQKQL VVVCNDL YKVS YDQG | 540 |
| VACV-3737_D13L.pro | FTP KI FFRPTTI TANVSRGKDKL SVRVVYSTMDVNHP I YVYQKQL VVVCNDL YKVS YDQG | 540 |
| VACV-DUKE_D13L.pro | FTP KI FFRPTTI TANVSRGKDKL SVRVVYSTMDVNHP I YVYQKQL VVVCNDL YKVS YDQG | 540 |



+ Majority

Majority

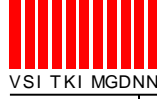

550

|                    |               |     |
|--------------------|---------------|-----|
| ACAM2000_D13L.pro  | VSI TKI MGDNN | 551 |
| DPP9_D13L.pro      | VSI TKI MGDNN | 551 |
| DPP10_D13L.pro     | VSI TKI MGDNN | 551 |
| DPP11_D13L.pro     | VSI TKI MGDNN | 551 |
| DPP12_D13L.pro     | VSI TKI MGDNN | 551 |
| DPP13_D13L.pro     | VSI TKI MGDNN | 551 |
| DPP15_D13L.pro     | VSI TKI MGDNN | 551 |
| DPP16_D13L.pro     | VSI TKI MGDNN | 551 |
| DPP17_D13L.pro     | VSI TKI MGDNN | 551 |
| DPP19_D13L.pro     | VSI TKI MGDNN | 551 |
| DPP20_D13L.pro     | VSI TKI MGDNN | 551 |
| DPP21_D13L.pro     | VSI TKI MGDNN | 551 |
| CL3_D13L.pro       | VSI TKI MGDNN | 551 |
| VACV-3737_D13L.pro | VSI TKI MGDNN | 551 |
| VACV-DUKE_D13L.pro | VSI TKI MGDNN | 551 |



+ Majority

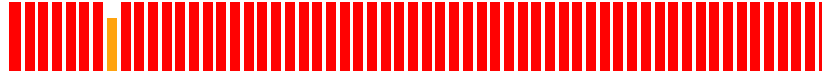

Majority

CSAACCLPVSTAYHI KNPI GGVFFTDSPHELLGYSRDLDTDVVI DKLRSAKTSI DI EHLA  
 190 200 210 220 230 240

|                    |                                                                   |     |
|--------------------|-------------------------------------------------------------------|-----|
| ACAM2000_F13L.pro  | CSAACCLPVSTAYHI KNPI GGVFFTDSPHELLGYSRDLDTDVVI DKLRSAKTSI DI EHLA | 240 |
| DPP9_F13L.pro      | CSAACCLPVSTAYHI KNPI GGVFFTDSPHELLGYSRDLDTDVVI DKLRSAKTSI DI EHLA | 240 |
| DPP10_F13L.pro     | CSAACCLPVSTAYHI KNPI GGVFFTDSPHELLGYSRDLDTDVVI DKLRSAKTSI DI EHLA | 240 |
| DPP11_F13L.pro     | CSAACCLPVSTAYHI KNPI GGVFFTDSPHELLGYSRDLDTDVVI DKLRSAKTSI DI EHLA | 240 |
| DPP12_F13L.pro     | CSAACCLPVSTAYHI KNPI GGVFFTDSPHELLGYSRDLDTDVVI DKLRSAKTSI DI EHLA | 240 |
| DPP13_F13L.pro     | CSAACCLPVSTAYHI KNPI GGVFFTDSPHELLGYSRDLDTDVVI DKLRSAKTSI DI EHLA | 240 |
| DPP15_F13L.pro     | CSAACCLPVSTAYHI KNPI GGVFFTDSPHELLGYSRDLDTDVVI DKLRSAKTSI DI EHLA | 240 |
| DPP16_F13L.pro     | CSAACCLPVSTAYHI KNPI GGVFFTDSPHELLGYSRDLDTDVVI DKLRSAKTSI DI EHLA | 240 |
| DPP17_F13L.pro     | CSAACCLPVSTAYHI KNPI GGVFFTDSPHELLGYSRDLDTDVVI DKLRSAKTSI DI EHLA | 240 |
| DPP19_F13L.pro     | CSAACCLPVSTAYHI KNPI GGVFFTDSPHELLGYSRDLDTDVVI DKLRSAKTSI DI EHLA | 240 |
| DPP20_F13L.pro     | CSAACCLPVSTAYHI KNPI GGVFFTDSPHELLGYSRDLDTDVVI DKLRSAKTSI DI EHLA | 240 |
| DPP21_F13L.pro     | CSAACCLPVSTAYHI KNPI GGVFFTDSPHELLGYSRDLDTDVVI DKLRSAKTSI DI EHLA | 240 |
| CL3_F13L.pro       | CSAACCLPVSTAYHI KNPI GGVFFTDSPHELLGYSRDLDTDVVI DKLRSAKTSI DI EHLA | 240 |
| VACV-3737_F13L.pro | CSAACCLPVSTAYHI KNPI GGVFFTDSPHELLGYSRDLDTDVVI DKLRSAKTSI DI EHLA | 240 |
| VACV-DUKE_F13L.pro | CSAACCLPVSTAYHI KNPI GGVFFTDSPHELLGYSRDLDTDVVI DKLRSAKTSI DI EHLA | 240 |

+ Majority

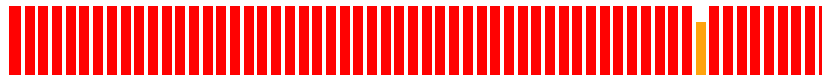

Majority

I VPTTRVDGNSYYWPI YNSI I EAAI NRGVKI RLLVGNWDKNDVYSMATARSLDALCVQN  
 250 260 270 280 290 300

|                    |                                                                   |     |
|--------------------|-------------------------------------------------------------------|-----|
| ACAM2000_F13L.pro  | I VPTTRVDGNSYYWPI YNSI I EAAI NRGVKI RLLVGNWDKNDVYSMATARSLDALCVQN | 300 |
| DPP9_F13L.pro      | I VPTTRVDGNSYYWPI YNSI I EAAI NRGVKI RLLVGNWDKNDVYSMATARSLDALCVQN | 300 |
| DPP10_F13L.pro     | I VPTTRVDGNSYYWPI YNSI I EAAI NRGVKI RLLVGNWDKNDVYSMATARSLDALCVQN | 300 |
| DPP11_F13L.pro     | I VPTTRVDGNSYYWPI YNSI I EAAI NRGVKI RLLVGNWDKNDVYSMATARSLDALCVQN | 300 |
| DPP12_F13L.pro     | I VPTTRVDGNSYYWPI YNSI I EAAI NRGVKI RLLVGNWDKNDVYSMATARSLDALCVQN | 300 |
| DPP13_F13L.pro     | I VPTTRVDGNSYYWPI YNSI I EAAI NRGVKI RLLVGNWDKNDVYSMATARSLDALCVQN | 300 |
| DPP15_F13L.pro     | I VPTTRVDGNSYYWPI YNSI I EAAI NRGVKI RLLVGNWDKNDVYSMATARSLDALCVQN | 300 |
| DPP16_F13L.pro     | I VPTTRVDGNSYYWPI YNSI I EAAI NRGVKI RLLVGNWDKNDVYSMATARSLDALCVQN | 300 |
| DPP17_F13L.pro     | I VPTTRVDGNSYYWPI YNSI I EAAI NRGVKI RLLVGNWDKNDVYSMATARSLDALCVQN | 300 |
| DPP19_F13L.pro     | I VPTTRVDGNSYYWPI YNSI I EAAI NRGVKI RLLVGNWDKNDVYSMATARSLDALCVQN | 300 |
| DPP20_F13L.pro     | I VPTTRVDGNSYYWPI YNSI I EAAI NRGVKI RLLVGNWDKNDVYSMATARSLDALCVQN | 300 |
| DPP21_F13L.pro     | I VPTTRVDGNSYYWPI YNSI I EAAI NRGVKI RLLVGNWDKNDVYSMATARSLDALCVQN | 300 |
| CL3_F13L.pro       | I VPTTRVDGNSYYWPI YNSI I EAAI NRGVKI RLLVGNWDKNDVYSMATARSLDALCVQN | 300 |
| VACV-3737_F13L.pro | I VPTTRVDGNSYYWPI YNSI I EAAI NRGVKI RLLVGNWDKNDVYSMATARSLDALCVQN | 300 |
| VACV-DUKE_F13L.pro | I VPTTRVDGNSYYWPI YNSI I EAAI NRGVKI RLLVGNWDKNDVYSMATARSLDALCVQN | 300 |

+ Majority



Majority

DL SVKVFTI QNNTKLLI VDDEYVHI TSANFDGTHYQNHGFVSFNSI DKQLVSEAKKI FER  
 310 320 330 340 350 360

|                    |                                                                    |     |
|--------------------|--------------------------------------------------------------------|-----|
| ACAM2000_F13L.pro  | DL SVKVFTI QNNTKLLI VDDEYVHI TSANFDGTHYQNHGFVSFNSI DKQLVSEAKKI FER | 360 |
| DPP9_F13L.pro      | DL SVKVFTI QNNTKLLI VDDEYVHI TSANFDGTHYQNHGFVSFNSI DKQLVSEAKKI FER | 360 |
| DPP10_F13L.pro     | DL SVKVFTI QNNTKLLI VDDEYVHI TSANFDGTHYQNHGFVSFNSI DKQLVSEAKKI FER | 360 |
| DPP11_F13L.pro     | DL SVKVFTI QNNTKLLI VDDEYVHI TSANFDGTHYQNHGFVSFNSI DKQLVSEAKKI FER | 360 |
| DPP12_F13L.pro     | DL SVKVFTI QNNTKLLI VDDEYVHI TSANFDGTHYQNHGFVSFNSI DKQLVSEAKKI FER | 360 |
| DPP13_F13L.pro     | DL SVKVFTI QNNTKLLI VDDEYVHI TSANFDGTHYQNHGFVSFNSI DKQLVSEAKKI FER | 360 |
| DPP15_F13L.pro     | DL SVKVFTI QNNTKLLI VDDEYVHI TSANFDGTHYQNHGFVSFNSI DKQLVSEAKKI FER | 360 |
| DPP16_F13L.pro     | DL SVKVFTI QNNTKLLI VDDEYVHI TSANFDGTHYQNHGFVSFNSI DKQLVSEAKKI FER | 360 |
| DPP17_F13L.pro     | DL SVKVFTI QNNTKLLI VDDEYVHI TSANFDGTHYQNHGFVSFNSI DKQLVSEAKKI FER | 360 |
| DPP19_F13L.pro     | DL SVKVFTI QNNTKLLI VDDEYVHI TSANFDGTHYQNHGFVSFNSI DKQLVSEAKKI FER | 360 |
| DPP20_F13L.pro     | DL SVKVFTI QNNTKLLI VDDEYVHI TSANFDGTHYQNHGFVSFNSI DKQLVSEAKKI FER | 360 |
| DPP21_F13L.pro     | DL SVKVFTI QNNTKLLI VDDEYVHI TSANFDGTHYQNHGFVSFNSI DKQLVSEAKKI FER | 360 |
| CL3_F13L.pro       | DL SVKVFTI QNNTKLLI VDDEYVHI TSANFDGTHYQNHGFVSFNSI DKQLVSEAKKI FER | 360 |
| VACV-3737_F13L.pro | DL SVKVFTI QNNTKLLI VDDEYVHI TSANFDGTHYQNHGFVSFNSI DKQLVSEAKKI FER | 360 |
| VACV-DUKE_F13L.pro | DL SVKVFTI QNNTKLLI VDDEYVHI TSANFDGTHYQNHGFVSFNSI DKQLVSEAKKI FER | 360 |

+ Majority

Majority

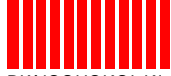

DWSSHHSKSLKI

370

|                    |              |     |
|--------------------|--------------|-----|
| ACAM2000_F13L.pro  | DWSSHHSKSLKI | 372 |
| DPP9_F13L.pro      | DWSSHHSKSLKI | 372 |
| DPP10_F13L.pro     | DWSSHHSKSLKI | 372 |
| DPP11_F13L.pro     | DWSSHHSKSLKI | 372 |
| DPP12_F13L.pro     | DWSSHHSKSLKI | 372 |
| DPP13_F13L.pro     | DWSSHHSKSLKI | 372 |
| DPP15_F13L.pro     | DWSSHHSKSLKI | 372 |
| DPP16_F13L.pro     | DWSSHHSKSLKI | 372 |
| DPP17_F13L.pro     | DWSSHHSKSLKI | 372 |
| DPP19_F13L.pro     | DWSSHHSKSLKI | 372 |
| DPP20_F13L.pro     | DWSSHHSKSLKI | 372 |
| DPP21_F13L.pro     | DWSSHHSKSLKI | 372 |
| CL3_F13L.pro       | DWSSHHSKSLKI | 372 |
| VACV-3737_F13L.pro | DWSSHHSKSLKI | 372 |
| VACV-DUKE_F13L.pro | DWSSHHSKSLKI | 372 |

## S. H3L

+ Majority

Majority

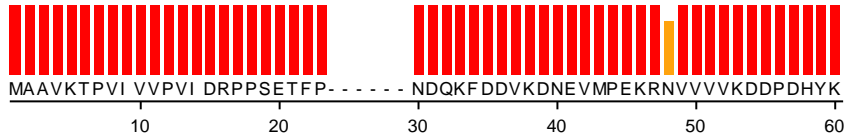

| Sequence          | 60                                                                |
|-------------------|-------------------------------------------------------------------|
| ACAM2000_H3L.pro  | MAAVKTPVI VVPVI DRPPSETFPNVHEHI NDQKFDDVKDNEVMPEKRNVVVVKDDPDHYK   |
| DPP9_H3L.pro      | MAAVKTPVI VVPVI DRPPSETFPNVHEHI NDQKFDDVKDNEVMPEKRNVVVVKDDPDHYK   |
| DPP10_H3L.pro     | MAAVKTPVI VVPVI DRPPSETFP - - - - NDQKFDDVKDNEVMPEKRNVVVVKDDPDHYK |
| DPP11_H3L.pro     | MAAVKTPVI VVPVI DRPPSETFP - - - - NDQKFDDVKDNEVMPEKRNVVVVKDDPDHYK |
| DPP12_H3L.pro     | MAAVKTPVI VVPVI DRPPSETFPNVHEHI NDQKFDDVKDNEVMPEKRNVVVVKDDPDHYK   |
| DPP13_H3L.pro     | MAAVKTPVI VVPVI DRPPSETFP - - - - NDQKFDDVKDNEVMPEKRNVVVVKDDPDHYK |
| DPP15_H3L.pro     | MAAVKTPVI VVPVI DRPPSETFPNVHEHI NDQKFDDVKDNEVMPEKRNVVVVKDDPDHYK   |
| DPP16_H3L.pro     | MAAVKTPVI VVPVI DRPPSETFPNVHEHI NDQKFDDVKDNEVMPEKRNVVVVKDDPDHYK   |
| DPP17_H3L.pro     | MAAVKTPVI VVPVI DRPPSETFP - - - - NDQKFDDVKDNEVMPEKRNVVVVKDDPDHYK |
| DPP19_H3L.pro     | MAAVKTPVI VVPVI DRPPSETFP - - - - NDQKFDDVKDNEVMPEKRNVVVVKDDPDHYK |
| DPP20_H3L.pro     | MAAVKTPVI VVPVI DRPPSETFPNVHEHI NDQKFDDVKDNEVMPEKRNVVVVKDDPDHYK   |
| DPP21_H3L.pro     | MAAVKTPVI VVPVI DRPPSETFP - - - - NDQKFDDVKDNEVMPEKRNVVVVKDDPDHYK |
| CL3_H3L.pro       | MAAVKTPVI VVPVI DRPPSETFP - - - - NDQKFDDVKDNEVMPEKRNVVVVKDDPDHYK |
| VACV-3737_H3L.pro | MAAVKTPVI VVPVI DRPPSETFP - - - - NDQKFDDVKDNEVMPEKRDVVVVKDDPDHYK |
| VACV-DUKE_H3L.pro | MAAVKTPVI VVPVI DRPPSETFPNVHEHI NDQKFDDVKDNEVMPEKRNVVVVKDDPDHYK   |

+ Majority

Majority

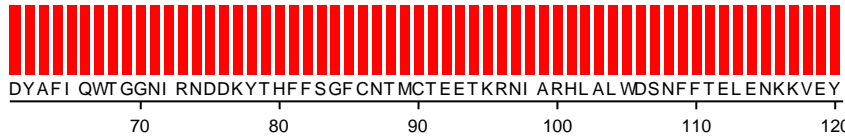

| Sequence          | 120                                                             |
|-------------------|-----------------------------------------------------------------|
| ACAM2000_H3L.pro  | DYAFI QWTGGNI RNDDKYTHFFSGFCNTMCTEETKRNI ARHLALWDSNFFTELENKKVEY |
| DPP9_H3L.pro      | DYAFI QWTGGNI RNDDKYTHFFSGFCNTMCTEETKRNI ARHLALWDSNFFTELENKKVEY |
| DPP10_H3L.pro     | DYAFI QWTGGNI RNDDKYTHFFSGFCNTMCTEETKRNI ARHLALWDSNFFTELENKKVEY |
| DPP11_H3L.pro     | DYAFI QWTGGNI RNDDKYTHFFSGFCNTMCTEETKRNI ARHLALWDSNFFTELENKKVEY |
| DPP12_H3L.pro     | DYAFI QWTGGNI RNDDKYTHFFSGFCNTMCTEETKRNI ARHLALWDSNFFTELENKKVEY |
| DPP13_H3L.pro     | DYAFI QWTGGNI RNDDKYTHFFSGFCNTMCTEETKRNI ARHLALWDSNFFTELENKKVEY |
| DPP15_H3L.pro     | DYAFI QWTGGNI RNDDKYTHFFSGFCNTMCTEETKRNI ARHLALWDSNFFTELENKKVEY |
| DPP16_H3L.pro     | DYAFI QWTGGNI RNDDKYTHFFSGFCNTMCTEETKRNI ARHLALWDSNFFTELENKKVEY |
| DPP17_H3L.pro     | DYAFI QWTGGNI RNDDKYTHFFSGFCNTMCTEETKRNI ARHLALWDSNFFTELENKKVEY |
| DPP19_H3L.pro     | DYAFI QWTGGNI RNDDKYTHFFSGFCNTMCTEETKRNI ARHLALWDSNFFTELENKKVEY |
| DPP20_H3L.pro     | DYAFI QWTGGNI RNDDKYTHFFSGFCNTMCTEETKRNI ARHLALWDSNFFTELENKKVEY |
| DPP21_H3L.pro     | DYAFI QWTGGNI RNDDKYTHFFSGFCNTMCTEETKRNI ARHLALWDSNFFTELENKKVEY |
| CL3_H3L.pro       | DYAFI QWTGGNI RNDDKYTHFFSGFCNTMCTEETKRNI ARHLALWDSNFFTELENKKVEY |
| VACV-3737_H3L.pro | DYAFI QWTGGNI RNDDKYTHFFSGFCNTMCTEETKRNI ARHLALWDSNFFTELENKKVEY |
| VACV-DUKE_H3L.pro | DYAFI QWTGGNI RNDDKYTHFFSGFCNTMCTEETKRNI ARHLALWDSNFFTELENKKVEY |

+ Majority

Majority

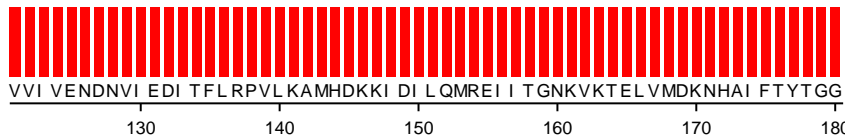

| Sequence          | 180                                                                   |
|-------------------|-----------------------------------------------------------------------|
| ACAM2000_H3L.pro  | VVI VENDNVI EDI TFLRPVLKAMHDKKI DI LQMREI I TGNKVKTELVMMDKNHAI FTYTGG |
| DPP9_H3L.pro      | VVI VENDNVI EDI TFLRPVLKAMHDKKI DI LQMREI I TGNKVKTELVMMDKNHAI FTYTGG |
| DPP10_H3L.pro     | VVI VENDNVI EDI TFLRPVLKAMHDKKI DI LQMREI I TGNKVKTELVMMDKNHAI FTYTGG |
| DPP11_H3L.pro     | VVI VENDNVI EDI TFLRPVLKAMHDKKI DI LQMREI I TGNKVKTELVMMDKNHAI FTYTGG |
| DPP12_H3L.pro     | VVI VENDNVI EDI TFLRPVLKAMHDKKI DI LQMREI I TGNKVKTELVMMDKNHAI FTYTGG |
| DPP13_H3L.pro     | VVI VENDNVI EDI TFLRPVLKAMHDKKI DI LQMREI I TGNKVKTELVMMDKNHAI FTYTGG |
| DPP15_H3L.pro     | VVI VENDNVI EDI TFLRPVLKAMHDKKI DI LQMREI I TGNKVKTELVMMDKNHAI FTYTGG |
| DPP16_H3L.pro     | VVI VENDNVI EDI TFLRPVLKAMHDKKI DI LQMREI I TGNKVKTELVMMDKNHAI FTYTGG |
| DPP17_H3L.pro     | VVI VENDNVI EDI TFLRPVLKAMHDKKI DI LQMREI I TGNKVKTELVMMDKNHAI FTYTGG |
| DPP19_H3L.pro     | VVI VENDNVI EDI TFLRPVLKAMHDKKI DI LQMREI I TGNKVKTELVMMDKNHAI FTYTGG |
| DPP20_H3L.pro     | VVI VENDNVI EDI TFLRPVLKAMHDKKI DI LQMREI I TGNKVKTELVMMDKNHAI FTYTGG |
| DPP21_H3L.pro     | VVI VENDNVI EDI TFLRPVLKAMHDKKI DI LQMREI I TGNKVKTELVMMDKNHAI FTYTGG |
| CL3_H3L.pro       | VVI VENDNVI EDI TFLRPVLKAMHDKKI DI LQMREI I TGNKVKTELVMMDKNHAI FTYTGG |
| VACV-3737_H3L.pro | VVI VENDNVI EDI TFLRPVLKAMHDKKI DI LQMREI I TGNKVKTELVMMDKNHAI FTYTGG |
| VACV-DUKE_H3L.pro | VVI VENDNVI EDI TFLRPVLKAMHDKKI DI LQMREI I TGNKVKTELVMMDKNHAI FTYTGG |

+ Majority

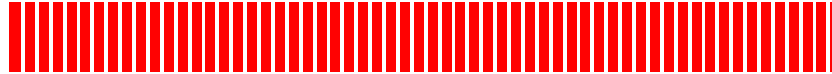

Majority

YDVLSL SAYI I RVTTALNI VDEI I KSGGLSSGFYFEI ARI ENEMKI NRQI LDNAAKYVEHD  
 190 200 210 220 230 240

|                   |                                                                         |     |
|-------------------|-------------------------------------------------------------------------|-----|
| ACAM2000_H3L.pro  | YDVLSL SAYI I RVTTALNI VDEI I KSGGLSSGFYFEI ARI ENEMKI NRQI LDNAAKYVEHD | 240 |
| DPP9_H3L.pro      | YDVLSL SAYI I RVTTALNI VDEI I KSGGLSSGFYFEI ARI ENEMKI NRQI LDNAAKYVEHD | 240 |
| DPP10_H3L.pro     | YDVLSL SAYI I RVTTALNI VDEI I KSGGLSSGFYFEI ARI ENEMKI NRQI LDNAAKYVEHD | 234 |
| DPP11_H3L.pro     | YDVLSL SAYI I RVTTALNI VDEI I KSGGLSSGFYFEI ARI ENEMKI NRQI LDNAAKYVEHD | 234 |
| DPP12_H3L.pro     | YDVLSL SAYI I RVTTALNI VDEI I KSGGLSSGFYFEI ARI ENEMKI NRQI LDNAAKYVEHD | 240 |
| DPP13_H3L.pro     | YDVLSL SAYI I RVTTALNI VDEI I KSGGLSSGFYFEI ARI ENEMKI NRQI LDNAAKYVEHD | 234 |
| DPP15_H3L.pro     | YDVLSL SAYI I RVTTALNI VDEI I KSGGLSSGFYFEI ARI ENEMKI NRQI LDNAAKYVEHD | 240 |
| DPP16_H3L.pro     | YDVLSL SAYI I RVTTALNI VDEI I KSGGLSSGFYFEI ARI ENEMKI NRQI LDNAAKYVEHD | 240 |
| DPP17_H3L.pro     | YDVLSL SAYI I RVTTALNI VDEI I KSGGLSSGFYFEI ARI ENEMKI NRQI LDNAAKYVEHD | 234 |
| DPP19_H3L.pro     | YDVLSL SAYI I RVTTALNI VDEI I KSGGLSSGFYFEI ARI ENEMKI NRQI LDNAAKYVEHD | 234 |
| DPP20_H3L.pro     | YDVLSL SAYI I RVTTALNI VDEI I KSGGLSSGFYFEI ARI ENEMKI NRQI LDNAAKYVEHD | 240 |
| DPP21_H3L.pro     | YDVLSL SAYI I RVTTALNI VDEI I KSGGLSSGFYFEI ARI ENEMKI NRQI LDNAAKYVEHD | 234 |
| CL3_H3L.pro       | YDVLSL SAYI I RVTTALNI VDEI I KSGGLSSGFYFEI ARI ENEMKI NRQI LDNAAKYVEHD | 234 |
| VACV-3737_H3L.pro | YDVLSL SAYI I RVTTALNI VDEI I KSGGLSSGFYFEI ARI ENEMKI NRQI LDNAAKYVEHD | 234 |
| VACV-DUKE_H3L.pro | YDVLSL SAYI I RVTTALNI VDEI I KSGGLSSGFYFEI ARI ENEMKI NRQI LDNAAKYVEHD | 240 |

+ Majority

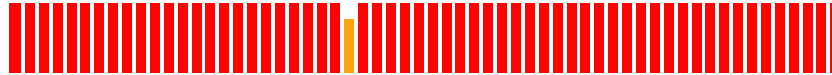

Majority

PRLVAEHRFENMKPNFWSRI GTAALKRYPGVMYAFTTPLI SFFGLFDI NVI GLI VI LFI M  
 250 260 270 280 290 300

|                   |                                                                     |     |
|-------------------|---------------------------------------------------------------------|-----|
| ACAM2000_H3L.pro  | PRLVAEHRFENMKPNFWSRI GTAALKRYPGVMYAFTTPLI SFFGLFDI NVI GLI VI LFI M | 300 |
| DPP9_H3L.pro      | PRLVAEHRFENMKPNFWSRI GTAALKRYPGVMYAFTTPLI SFFGLFDI NVI GLI VI LFI M | 300 |
| DPP10_H3L.pro     | PRLVAEHRFENMKPNFWSRI GTAALKRYPGVMYAFTTPLI SFFGLFDI NVI GLI VI LFI M | 294 |
| DPP11_H3L.pro     | PRLVAEHRFENMKPNFWSRI GTAALKRYPGVMYAFTTPLI SFFGLFDI NVI GLI VI LFI M | 294 |
| DPP12_H3L.pro     | PRLVAEHRFENMKPNFWSRI GTAALKRYPGVMYAFTTPLI SFFGLFDI NVI GLI VI LFI M | 300 |
| DPP13_H3L.pro     | PRLVAEHRFENMKPNFWSRI GTAALKRYPGVMYAFTTPLI SFFGLFDI NVI GLI VI LFI M | 294 |
| DPP15_H3L.pro     | PRLVAEHRFENMKPNFWSRI GTAALKRYPGVMYAFTTPLI SFFGLFDI NVI GLI VI LFI M | 300 |
| DPP16_H3L.pro     | PRLVAEHRFENMKPNFWSRI GTAALKRYPGVMYAFTTPLI SFFGLFDI NVI GLI VI LFI M | 300 |
| DPP17_H3L.pro     | PRLVAEHRFENMKPNFWSRI GTAALKRYPGVMYAFTTPLI SFFGLFDI NVI GLI VI LFI M | 294 |
| DPP19_H3L.pro     | PRLVAEHRFENMKPNFWSRI GTAALKRYPGVMYAFTTPLI SFFGLFDI NVI GLI VI LFI M | 294 |
| DPP20_H3L.pro     | PRLVAEHRFENMKPNFWSRI GTAALKRYPGVMYAFTTPLI SFFGLFDI NVI GLI VI LFI M | 300 |
| DPP21_H3L.pro     | PRLVAEHRFENMKPNFWSRI GTAALKRYPGVMYAFTTPLI SFFGLFDI NVI GLI VI LFI M | 294 |
| CL3_H3L.pro       | PRLVAEHRFENMKPNFWSRI GTAALKRYPGVMYAFTTPLI SFFGLFDI NVI GLI VI LFI M | 294 |
| VACV-3737_H3L.pro | PRLVAEHRFENMKPNFWSRI GTAALKRYPGVMYAFTTPLI SFFGLFDI NVI GLI VI LFI M | 294 |
| VACV-DUKE_H3L.pro | PRLVAEHRFENMKPNFWSRI GTAALKRYPGVMYAFTTPLI SFFGLFDI NVI GLI VI LFI M | 300 |

+ Majority

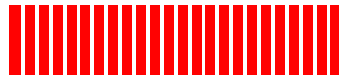

Majority

FMLI FNVKSKLLWFLTGTFVTAFI  
 310 320

|                   |                           |     |
|-------------------|---------------------------|-----|
| ACAM2000_H3L.pro  | FMLI FNVKSKLLWFLTGTFVTAFI | 324 |
| DPP9_H3L.pro      | FMLI FNVKSKLLWFLTGTFVTAFI | 324 |
| DPP10_H3L.pro     | FMLI FNVKSKLLWFLTGTFVTAFI | 318 |
| DPP11_H3L.pro     | FMLI FNVKSKLLWFLTGTFVTAFI | 318 |
| DPP12_H3L.pro     | FMLI FNVKSKLLWFLTGTFVTAFI | 324 |
| DPP13_H3L.pro     | FMLI FNVKSKLLWFLTGTFVTAFI | 318 |
| DPP15_H3L.pro     | FMLI FNVKSKLLWFLTGTFVTAFI | 324 |
| DPP16_H3L.pro     | FMLI FNVKSKLLWFLTGTFVTAFI | 324 |
| DPP17_H3L.pro     | FMLI FNVKSKLLWFLTGTFVTAFI | 318 |
| DPP19_H3L.pro     | FMLI FNVKSKLLWFLTGTFVTAFI | 318 |
| DPP20_H3L.pro     | FMLI FNVKSKLLWFLTGTFVTAFI | 324 |
| DPP21_H3L.pro     | FMLI FNVKSKLLWFLTGTFVTAFI | 318 |
| CL3_H3L.pro       | FMLI FNVKSKLLWFLTGTFVTAFI | 318 |
| VACV-3737_H3L.pro | FMLI FNVKSKLLWFLTGTFVTAFI | 318 |
| VACV-DUKE_H3L.pro | FMLI FNVKSKLLWFLTGTFVTAFI | 324 |





+ Majority

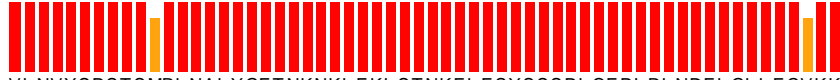

Majority

VLNVYSPSTSMRLNAI YGFTNKNKLEKLSTNKELESYSSSPLQEPI RLNDFLGLLECVKK  
 190 200 210 220 230 240

|                   |                                                                 |     |
|-------------------|-----------------------------------------------------------------|-----|
| ACAM2000_L4R.pro  | VLNVYSPSTSMRLNAI YGFTNKNKLEKLSTNKELESYSSSPLQEPI RLNDFLGLLECVKK  | 240 |
| DPP9_L4R.pro      | VLNVYSPSTSMRLNAI YGFTNKNKLEKLSTNKELESYSSSPLQEPI RLNDFLGLLECVKK  | 240 |
| DPP10_L4R.pro     | VLNVYSPSTSMRLNAI YGFTNKNKLEKLSTNKELESYSSSPLQEPI RLNDFLGLLECVKK  | 240 |
| DPP11_L4R.pro     | VLNVYSPSTSMRLNAI YGFTNKNKLEKLSTNKELESYSSSPLQEPI RLNDFLGLLECI KK | 240 |
| DPP12_L4R.pro     | VLNVYSPSTSMRLNAI YGFTNKNKLEKLSTNKELESYSSSPLQEPI RLNDFLGLLECVKK  | 240 |
| DPP13_L4R.pro     | VLNVYSPSTSMRLNAI YGFTNKNKLEKLSTNKELESYSSSPLQEPI RLNDFLGLLECVKK  | 240 |
| DPP15_L4R.pro     | VLNVYSPSTSMRLNAI YGFTNKNKLEKLSTNKELESYSSSPLQEPI RLNDFLGLLECVKK  | 240 |
| DPP16_L4R.pro     | VLNVYSPSTSMRLNAI YGFTNKNKLEKLSTNKELESYSSSPLQEPI RLNDFLGLLECI KK | 240 |
| DPP17_L4R.pro     | VLNVYSPSTSMRLNAI YGFTNKNKLEKLSTNKELESYSSSPLQEPI RLNDFLGLLECVKK  | 240 |
| DPP19_L4R.pro     | VLNVYSPSTSI RLNAI YGFTNKNKLEKLSTNKELESYSSSPLQEPI RLNDFLGLLECVKK | 240 |
| DPP20_L4R.pro     | VLNVYSPSTSMRLNAI YGFTNKNKLEKLSTNKELESYSSSPLQEPI RLNDFLGLLECVKK  | 240 |
| DPP21_L4R.pro     | VLNVYSPSTSMRLNAI YGFTNKNKLEKLSTNKELESYSSSPLQEPI RLNDFLGLLECVKK  | 240 |
| CL3_L4R.pro       | VLNVYSPSTSMRLNAI YGFTNKNKLEKLSTNKELESYSSSPLQEPI RLNDFLGLLECI KK | 240 |
| VACV-3737_L4R.pro | VLNVYSPSTSMRLNAI YGFTNKNKLEKLSTNKELESYSSSPLQEPI RLNDFLGLLECVKK  | 240 |
| VACV-DUKE_L4R.pro | VLNVYSPSTSMRLNAI YGFTNKNKLEKLSTNKELESYSSSPLQEPI RLNDFLGLLECVKK  | 240 |

+ Majority

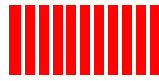

Majority

NI PLTDI PTKD  
 250

|                   |               |     |
|-------------------|---------------|-----|
| ACAM2000_L4R.pro  | NI PLTDI PTKD | 251 |
| DPP9_L4R.pro      | NI PLTDI PTKD | 251 |
| DPP10_L4R.pro     | NI PLTDI PTKD | 251 |
| DPP11_L4R.pro     | NI PLTDI PTKD | 251 |
| DPP12_L4R.pro     | NI PLTDI PTKD | 251 |
| DPP13_L4R.pro     | NI PLTDI PTKD | 251 |
| DPP15_L4R.pro     | NI PLTDI PTKD | 251 |
| DPP16_L4R.pro     | NI PLTDI PTKD | 251 |
| DPP17_L4R.pro     | NI PLTDI PTKD | 251 |
| DPP19_L4R.pro     | NI PLTDI PTKD | 251 |
| DPP20_L4R.pro     | NI PLTDI PTKD | 251 |
| DPP21_L4R.pro     | NI PLTDI PTKD | 251 |
| CL3_L4R.pro       | NI PLTDI PTKD | 251 |
| VACV-3737_L4R.pro | NI PLTDI PTKD | 251 |
| VACV-DUKE_L4R.pro | NI PLTDI PTKD | 251 |

# U. O1L

+ Majority

Majority

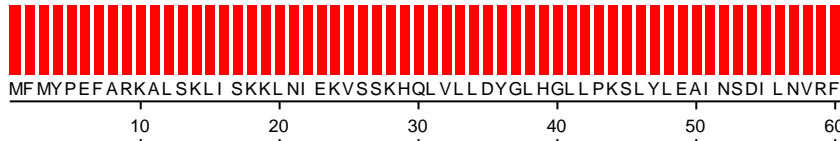

|                   |                                                               |    |
|-------------------|---------------------------------------------------------------|----|
| ACAM2000_O1L.pro  | MFMYPEFARKALSKLI SKKLNIEKVSSKHQLVLLDYGLHGLLPKSLYLEAINSIDLNVRF | 60 |
| DPP9_O1L.pro      | MFMYPEFARKALSKLI SKKLNIEKVSSKHQLVLLDYGLHGLLPKSLYLEAINSIDLNVRF | 60 |
| DPP10_O1L.pro     | MFMYPEFARKALSKLI SKKLNIEKVSSKHQLVLLDYGLHGLLPKSLYLEAINSIDLNVRF | 60 |
| DPP11_O1L.pro     | MFMYPEFARKALSKLI SKKLNIEKVSSKHQLVLLDYGLHGLLPKSLYLEAINSIDLNVRF | 60 |
| DPP12_O1L.pro     | MFMYPEFARKALSKLI SKKLNIEKVSSKHQLVLLDYGLHGLLPKSLYLEAINSIDLNVRF | 60 |
| DPP13_O1L.pro     | MFMYPEFARKALSKLI SKKLNIEKVSSKHQLVLLDYGLHGLLPKSLYLEAINSIDLNVRF | 60 |
| DPP15_O1L.pro     | MFMYPEFARKALSKLI SKKLNIEKVSSKHQLVLLDYGLHGLLPKSLYLEAINSIDLNVRF | 60 |
| DPP16_O1L.pro     | MFMYPEFARKALSKLI SKKLNIEKVSSKHQLVLLDYGLHGLLPKSLYLEAINSIDLNVRF | 60 |
| DPP17_O1L.pro     | MFMYPEFARKALSKLI SKKLNIEKVSSKHQLVLLDYGLHGLLPKSLYLEAINSIDLNVRF | 60 |
| DPP19_O1L.pro     | MFMYPEFARKALSKLI SKKLNIEKVSSKHQLVLLDYGLHGLLPKSLYLEAINSIDLNVRF | 60 |
| DPP20_O1L.pro     | MFMYPEFARKALSKLI SKKLNIEKVSSKHQLVLLDYGLHGLLPKSLYLEAINSIDLNVRF | 60 |
| DPP21_O1L.pro     | MFMYPEFARKALSKLI SKKLNIEKVSSKHQLVLLDYGLHGLLPKSLYLEAINSIDLNVRF | 60 |
| CL3_O1L.pro       | MFMYPEFARKALSKLI SKKLNIEKVSSKHQLVLLDYGLHGLLPKSLYLEAINSIDLNVRF | 60 |
| VACV-3737_O1L.pro | MFMYPEFARKALSKLI SKKLNIEKVSSKHQLVLLDYGLHGLLPKSLYLEAINSIDLNVRF | 60 |
| VACV-DUKE_O1L.pro | MFMYPEFARKALSKLI SKKLNIEKVSSKHQLVLLDYGLHGLLPKSLYLEAINSIDLNVRF | 60 |

+ Majority

Majority

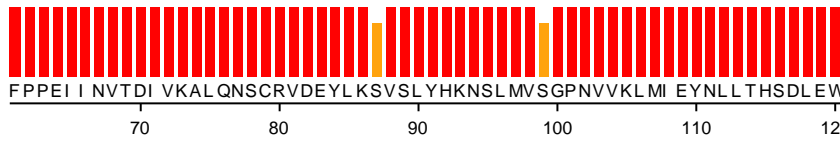

|                   |                                                                  |     |
|-------------------|------------------------------------------------------------------|-----|
| ACAM2000_O1L.pro  | FPPEI I NVTDI VKALQNSCRVDEYLKSVSLYHKNSLMVSGPNVVKLMI EYNLLTHSDLEW | 120 |
| DPP9_O1L.pro      | FPPEI I NVTDI VKALQNSCRVDEYLKSVSLYHKNSLMVSGPNVVKLMI EYNLLTHSDLEW | 120 |
| DPP10_O1L.pro     | FPPEI I NVTDI VKALQNSCRVDEYLKSVSLYHKNSLMVSGPNVVKLMI EYNLLTHSDLEW | 120 |
| DPP11_O1L.pro     | FPPEI I NVTDI VKALQNSCRVDEYLKSVSLYHKNSLMVSGPNVVKLMI EYNLLTHSDLEW | 120 |
| DPP12_O1L.pro     | FPPEI I NVTDI VKALQNSCRVDEYLKSVSLYHKNSLMVSGPNVVKLMI EYNLLTHSDLEW | 120 |
| DPP13_O1L.pro     | FPPEI I NVTDI VKALQNSCRVDEYLKSVSLYHKNSLMVSGPNVVKLMI EYNLLTHSDLEW | 120 |
| DPP15_O1L.pro     | FPPEI I NVTDI VKALQNSCRVDEYLKSVSLYHKNSLMVSGPNVVKLMI EYNLLTHSDLEW | 120 |
| DPP16_O1L.pro     | FPPEI I NVTDI VKALQNSCRVDEYLKSVSLYHKNSLMVSGPNVVKLMI EYNLLTHSDLEW | 120 |
| DPP17_O1L.pro     | FPPEI I NVTDI VKALQNSCRVDEYLKSVSLYHKNSLMVSGPNVVKLMI EYNLLTHSDLEW | 120 |
| DPP19_O1L.pro     | FPPEI I NVTDI VKALQNSCRVDEYLKSVSLYHKNSLMVSGPNVVKLMI EYNLLTHSDLEW | 120 |
| DPP20_O1L.pro     | FPPEI I NVTDI VKALQNSCRVDEYLKSVSLYHKNSLMVSGPNVVKLMI EYNLLTHSDLEW | 120 |
| DPP21_O1L.pro     | FPPEI I NVTDI VKALQNSCRVDEYLKSVSLYHKNSLMVSGPNVVKLMI EYNLLTHSDLEW | 120 |
| CL3_O1L.pro       | FPPEI I NVTDI VKALQNSCRVDEYLKSVSLYHKNSLMVSGPNVVKLMI EYNLLTHSDLEW | 120 |
| VACV-3737_O1L.pro | FPPEI I NVTDI VKALQNSCRVDEYLKSVSLYHKNSLMVSGPNVVKLMI EYNLLTHSDLEW | 120 |
| VACV-DUKE_O1L.pro | FPPEI I NVTDI VKALQNSCRVDEYLKSVSLYHKNSLMVSGPNVVKLMI EYNLLTHSDLEW | 120 |

+ Majority

Majority

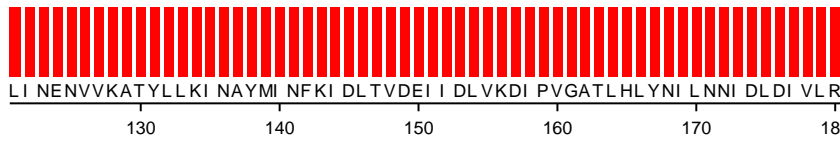

|                   |                                                                       |     |
|-------------------|-----------------------------------------------------------------------|-----|
| ACAM2000_O1L.pro  | LI NENVVKATYLLKI NAYMI NFKI DLTVDI I DLVKDI PVGATLHLYNI LNNI DLDI VLR | 180 |
| DPP9_O1L.pro      | LI NENVVKATYLLKI NAYMI NFKI DLTVDI I DLVKDI PVGATLHLYNI LNNI DLDI VLR | 180 |
| DPP10_O1L.pro     | LI NENVVKATYLLKI NAYMI NFKI DLTVDI I DLVKDI PVGATLHLYNI LNNI DLDI VLR | 180 |
| DPP11_O1L.pro     | LI NENVVKATYLLKI NAYMI NFKI DLTVDI I DLVKDI PVGATLHLYNI LNNI DLDI VLR | 180 |
| DPP12_O1L.pro     | LI NENVVKATYLLKI NAYMI NFKI DLTVDI I DLVKDI PVGATLHLYNI LNNI DLDI VLR | 180 |
| DPP13_O1L.pro     | LI NENVVKATYLLKI NAYMI NFKI DLTVDI I DLVKDI PVGATLHLYNI LNNI DLDI VLR | 180 |
| DPP15_O1L.pro     | LI NENVVKATYLLKI NAYMI NFKI DLTVDI I DLVKDI PVGATLHLYNI LNNI DLDI VLR | 180 |
| DPP16_O1L.pro     | LI NENVVKATYLLKI NAYMI NFKI DLTVDI I DLVKDI PVGATLHLYNI LNNI DLDI VLR | 180 |
| DPP17_O1L.pro     | LI NENVVKATYLLKI NAYMI NFKI DLTVDI I DLVKDI PVGATLHLYNI LNNI DLDI VLR | 180 |
| DPP19_O1L.pro     | LI NENVVKATYLLKI NAYMI NFKI DLTVDI I DLVKDI PVGATLHLYNI LNNI DLDI VLR | 180 |
| DPP20_O1L.pro     | LI NENVVKATYLLKI NAYMI NFKI DLTVDI I DLVKDI PVGATLHLYNI LNNI DLDI VLR | 180 |
| DPP21_O1L.pro     | LI NENVVKATYLLKI NAYMI NFKI DLTVDI I DLVKDI PVGATLHLYNI LNNI DLDI VLR | 180 |
| CL3_O1L.pro       | LI NENVVKATYLLKI NAYMI NFKI DLTVDI I DLVKDI PVGATLHLYNI LNNI DLDI VLR | 180 |
| VACV-3737_O1L.pro | LI NENVVKATYLLKI NAYMI NFKI DLTVDI I DLVKDI PVGATLHLYNI LNNI DLDI VLR | 180 |
| VACV-DUKE_O1L.pro | LI NENVVKATYLLKI NAYMI NFKI DLTVDI I DLVKDI PVGATLHLYNI LNNI DLDI VLR | 180 |

+ Majority



Majority

I SDEYNI PPVHDI LSKLTDEEMCI KLVTKYPMDNVI NFI NQDVRYSPTFI KTI KDFVNKH  
 190 200 210 220 230 240

|                   |                                                                      |     |
|-------------------|----------------------------------------------------------------------|-----|
| ACAM2000_O1L.pro  | I SDEYNI PPVHDI LSKLTDEEMCI KLVTKYPMDNVI NFI NQDVRYSPTFI KTI KDFVNKH | 240 |
| DPP9_O1L.pro      | I SDEYNI PPVHDI LSKLTDEEMCI KLVTKYPMDNVI NFI NQDVRYSPTFI KTI KDFVNKH | 240 |
| DPP10_O1L.pro     | I SDEYNI PPVHDI LSKLTDEEMCI KLVTKYPMDNVI NFI NQDVRYSPTFI KTI KDFVNKH | 240 |
| DPP11_O1L.pro     | I SDEYNI PPVHDI LSKLTDEEMCI KLVTKYPMDNVI NFI NQDVRYSPTFI KTI KDFVNKH | 240 |
| DPP12_O1L.pro     | I SDEYNI PPVHDI LSKLTDEEMCI KLVTKYPMDNVI NFI NQDVRYSPTFI KTI KDFVNKH | 240 |
| DPP13_O1L.pro     | I SDEYNI PPVHDI LSKLTDEEMCI KLVTKYPMDNVI NFI NQDVRYSPTFI KTI KDFVNKH | 240 |
| DPP15_O1L.pro     | I SDEYNI PPVHDI LSKLTDEEMCI KLVTKYPMDNVI NFI NQDVRYSPTFI KTI KDFVNKH | 240 |
| DPP16_O1L.pro     | I SDEYNI PPVHDI LSKLTDEEMCI KLVTKYPMDNVI NFI NQDVRYSPTFI KTI KDFVNKH | 240 |
| DPP17_O1L.pro     | I SDEYNI PPVHDI LSKLTDEEMCI KLVTKYPMDNVI NFI NQDVRYSPTFI KTI KDFVNKH | 240 |
| DPP19_O1L.pro     | I SDEYNI PPVHDI LSKLTDEEMCI KLVTKYPMDNVI NFI NQDVRYSPTFI KTI KDFVNKH | 240 |
| DPP20_O1L.pro     | I SDEYNI PPVHDI LSKLTDEEMCI KLVTKYPMDNVI NFI NQDVRYSPTFI KTI KDFVNKH | 240 |
| DPP21_O1L.pro     | I SDEYNI PPVHDI LSKLTDEEMCI KLVTKYPMDNVI NFI NQDVRYSPTFI KTI KDFVNKH | 240 |
| CL3_O1L.pro       | I SDEYNI PPVHDI LSKLTDEEMCI KLVTKYPMDNVI NFI NQDVRYSPTFI KTI KDFVNKH | 240 |
| VACV-3737_O1L.pro | I SDEYNI PPVHDI LSKLTDEEMCI KLVTKYPMDNVI NFI NQDVRYSPTFI KTI KDFVNKH | 240 |
| VACV-DUKE_O1L.pro | I SDEYNI PPVHDI LSKLTDEEMCI KLVTKYPMDNVI NFI NQDVRYSPTFI KTI KDFVNKH | 240 |

+ Majority

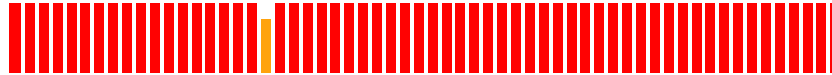

Majority

LPTMYDGLNDYLH SVI I DEDLI EEYKI KSVAMFNLEYKTDVDTLTLDEQI FVEVNI SYDD  
 250 260 270 280 290 300

|                   |                                                                     |     |
|-------------------|---------------------------------------------------------------------|-----|
| ACAM2000_O1L.pro  | LPTMYDGLNDYLH SVI I DEDLI EEYKI KSVAMFNLEYKTDVDTLTLDEQI FVEVNI SYDD | 300 |
| DPP9_O1L.pro      | LPTMYDGLNDYLH SVI I DEDLI EEYKI KSVAMFNLEYKTDVDTLTLDEQI FVEVNI SYDD | 300 |
| DPP10_O1L.pro     | LPTMYDGLNDYLH SVI I DEDLI EEYKI KSVAMFNLEYKTDVDTLTLDEQI FVEVNI SYDD | 300 |
| DPP11_O1L.pro     | LPTMYDGLNDYLH SVI I DEDLI EEYKI KSVAMFNLEYKTDVDTLTLDEQI FVEVNI SYDD | 300 |
| DPP12_O1L.pro     | LPTMYDGLNDYLH SVI I DEDLI EEYKI KSVAMFNLEYKTDVDTLTLDEQI FVEVNI SYDD | 300 |
| DPP13_O1L.pro     | LPTMYDGLNDYLH SVI I DEDLI EEYKI KSVAMFNLEYKTDVDTLTLDEQI FVEVNI SYDD | 300 |
| DPP15_O1L.pro     | LPTMYDGLNDYLH SVI I DEDLI EEYKI KSVAMFNLEYKTDVDTLTLDEQI FVEVNI SYDD | 300 |
| DPP16_O1L.pro     | LPTMYDGLNDYLH SVI I DEDLI EEYKI KSVAMFNLEYKTDVDTLTLDEQI FVEVNI SYDD | 300 |
| DPP17_O1L.pro     | LPTMYDGLNDYLH SVI I DEDLI EEYKI KSVAMFNLEYKTDVDTLTLDEQI FVEVNI SYDD | 300 |
| DPP19_O1L.pro     | LPTMYDGLNDYLH SVI I DEDLI EEYKI KSVAMFNLEYKTDVDTLTLDEQI FVEVNI SYDD | 300 |
| DPP20_O1L.pro     | LPTMYDGLNDYLH SVI I DEDLI EEYKI KSVAMFNLEYKTDVDTLTLDEQI FVEVNI SYDD | 300 |
| DPP21_O1L.pro     | LPTMYDGLNDYLH SVI I DEDLI EEYKI KSVAMFNLEYKTDVDTLTLDEQI FVEVNI SYDD | 300 |
| CL3_O1L.pro       | LPTMYDGLNDYLH SVI I DEDLI EEYKI KSVAMFNLEYKTDVDTLTLDEQI FVEVNI SYDD | 300 |
| VACV-3737_O1L.pro | LPTMYDGLNDYLH SVI I DEDLI EEYKI KSVAMFNLEYKTDVDTLTLDEQI FVEVNI SYDD | 300 |
| VACV-DUKE_O1L.pro | LPTMYDGLNDYLH SVI I DKDLI EEYKI KSVAMFNLEYKTDVDTLTLDEQI FVEVNI SYDD | 300 |

+ Majority

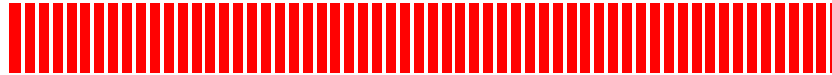

Majority

FRYRQFADEFRDYI MI KERRQI TMQSGDRI RRFRRPMSLRSTI I KKDTDSLEDI LAHI DN  
 310 320 330 340 350 360

|                   |                                                                      |     |
|-------------------|----------------------------------------------------------------------|-----|
| ACAM2000_O1L.pro  | FRYRQFADEFRDYI MI KERRQI TMQSGDRI RRFRRPMSLRSTI I KKDTDSLEDI LAHI DN | 360 |
| DPP9_O1L.pro      | FRYRQFADEFRDYI MI KERRQI TMQSGDRI RRFRRPMSLRSTI I KKDTDSLEDI LAHI DN | 360 |
| DPP10_O1L.pro     | FRYRQFADEFRDYI MI KERRQI TMQSGDRI RRFRRPMSLRSTI I KKDTDSLEDI LAHI DN | 360 |
| DPP11_O1L.pro     | FRYRQFADEFRDYI MI KERRQI TMQSGDRI RRFRRPMSLRSTI I KKDTDSLEDI LAHI DN | 360 |
| DPP12_O1L.pro     | FRYRQFADEFRDYI MI KERRQI TMQSGDRI RRFRRPMSLRSTI I KKDTDSLEDI LAHI DN | 360 |
| DPP13_O1L.pro     | FRYRQFADEFRDYI MI KERRQI TMQSGDRI RRFRRPMSLRSTI I KKDTDSLEDI LAHI DN | 360 |
| DPP15_O1L.pro     | FRYRQFADEFRDYI MI KERRQI TMQSGDRI RRFRRPMSLRSTI I KKDTDSLEDI LAHI DN | 360 |
| DPP16_O1L.pro     | FRYRQFADEFRDYI MI KERRQI TMQSGDRI RRFRRPMSLRSTI I KKDTDSLEDI LAHI DN | 360 |
| DPP17_O1L.pro     | FRYRQFADEFRDYI MI KERRQI TMQSGDRI RRFRRPMSLRSTI I KKDTDSLEDI LAHI DN | 360 |
| DPP19_O1L.pro     | FRYRQFADEFRDYI MI KERRQI TMQSGDRI RRFRRPMSLRSTI I KKDTDSLEDI LAHI DN | 360 |
| DPP20_O1L.pro     | FRYRQFADEFRDYI MI KERRQI TMQSGDRI RRFRRPMSLRSTI I KKDTDSLEDI LAHI DN | 360 |
| DPP21_O1L.pro     | FRYRQFADEFRDYI MI KERRQI TMQSGDRI RRFRRPMSLRSTI I KKDTDSLEDI LAHI DN | 360 |
| CL3_O1L.pro       | FRYRQFADEFRDYI MI KERRQI TMQSGDRI RRFRRPMSLRSTI I KKDTDSLEDI LAHI DN | 360 |
| VACV-3737_O1L.pro | FRYRQFADEFRDYI MI KERRQI TMQSGDRI RRFRRPMSLRSTI I KKDTDSLEDI LAHI DN | 360 |
| VACV-DUKE_O1L.pro | FRYRQFADEFRDYI MI KERRQI TMQSGDRI RRFRRPMSLRSTI I KKDTDSLEDI LAHI DN | 360 |

+ Majority



Majority

ARKNSK VSI EDVERI I SSFRLNPCVVRRTMLSDI DI KTKI MVLKI VKDWKSCAL T LSAI K  
 370 380 390 400 410 420

ACAM2000\_O1L.pro ARKNSK VSI EDVERI I SSFRLNPCVVRRTMLSDI DI KTKI MVLKI VKDWKSCAL T LSAI K 420  
 DPP9\_O1L.pro ARKNSK VSI EDVERI I SSFRLNPCVVRRTMLSDI DI KTKI MVLKI VKDWKSCAL T LSAI K 420  
 DPP10\_O1L.pro ARKNSK VSI EDVERI I SSFRLNPCVVRRTMLSDI DI KTKI MVLKI VKDWKSCAL T LSAI K 420  
 DPP11\_O1L.pro ARKNSK VSI EDVERI I SSFRLNPCVVRRTMLSDI DI KTKI MVLKI VKDWKSCAL T LSAI K 420  
 DPP12\_O1L.pro ARKNSK VSI EDVERI I SSFRLNPCVVRRTMLSDI DI KTKI MVLKI VKDWKSCAL T LSAI K 420  
 DPP13\_O1L.pro ARKNSK VSI EDVERI I SSFRLNPCVVRRTMLSDI DI KTKI MVLKI VKDWKSCAL T LSAI K 420  
 DPP15\_O1L.pro ARKNSK VSI EDVERI I SSFRLNPCVVRRTMLSDI DI KTKI MVLKI VKDWKSCAL T LSAI K 420  
 DPP16\_O1L.pro ARKNSK VSI EDVERI I SSFRLNPCVVRRTMLSDI DI KTKI MVLKI VKDWKSCAL T LSAI K 420  
 DPP17\_O1L.pro ARKNSK VSI EDVERI I SSFRLNPCVVRRTMLSDI DI KTKI MVLKI VKDWKSCAL T LSAI K 420  
 DPP19\_O1L.pro ARKNSK VSI EDVERI I SSFRLNPCVVRRTMLSDI DI KTKI MVLKI VKDWKSCAL T LSAI K 420  
 DPP20\_O1L.pro ARKNSK VSI EDVERI I SSFRLNPCVVRRTMLSDI DI KTKI MVLKI VKDWKSCAL T LSAI K 420  
 DPP21\_O1L.pro ARKNSK VSI EDVERI I SSFRLNPCVVRRTMLSDI DI KTKI MVLKI VKDWKSCAL T LSAI K 420  
 CL3\_O1L.pro ARKNSK VSI EDVERI I SSFRLNPCVVRRTMLSDI DI KTKI MVLKI VKDWKSCAL T LSAI K 420  
 VACV-3737\_O1L.pro ARKNSK VSI EDVERI I SSFRLNPCVVRRTMLSDI DI KTKI MVLKI VKDWKSCAL T LSAI K 420  
 VACV-DUKE\_O1L.pro ARKNSK VSI EDVERI I SSFRLNPCVVRRTMLSDI DI KTKI MVLKI VKDWKSCAL T LSAI K 420

+ Majority



Majority

GI MVTDTI NTVLSKI LHHHRNVFKYLT SVENKEI AVCNCSRCLSLFYRELKSVRCDLRTD  
 430 440 450 460 470 480

ACAM2000\_O1L.pro GI MVTDTI NTVLSKI LHHHRNVFKYLT SVENKEI AVCNCSRCLSLFYRELKSVRCDLRTD 480  
 DPP9\_O1L.pro GI MVTDTI NTVLSKI LHHHRNVFKYLT SVENKEI AVCNCSRCLSLFYRELKSVRCDLRTD 480  
 DPP10\_O1L.pro GI MVTDTI NTVLSKI LHHHRNVFKYLT SVENKEI AVCNCSRCLSLFYRELKSVRCDLRTD 480  
 DPP11\_O1L.pro GI MVTDTI NTVLSKI LHHHRNVFKYLT SVENKEI AVCNCSRCLSLFYRELKSVRCDLRTD 480  
 DPP12\_O1L.pro GI MVTDTI NTVLSKI LHHHRNVFKYLT SVENKEI AVCNCSRCLSLFYRELKSVRCDLRTD 480  
 DPP13\_O1L.pro GI MVTDTI NTVLSKI LHHHRNVFKYLT SVENKEI AVCNCSRCLSLFYRELKSVRCDLRTD 480  
 DPP15\_O1L.pro GI MVTDTI NTVLSKI LHHHRNVFKYLT SVENKEI AVCNCSRCLSLFYRELKSVRCDLRTD 480  
 DPP16\_O1L.pro GI MVTDTI NTVLSKI LHHHRNVFKYLT SVENKEI AVCNCSRCLSLFYRELKSVRCDLRTD 480  
 DPP17\_O1L.pro GI MVTDTI NTVLSKI LHHHRNVFKYLT SVENKEI AVCNCSRCLSLFYRELKSVRCDLRTD 480  
 DPP19\_O1L.pro GI MVTDTI NTVLSKI LHHHRNVFKYLT SVENKEI AVCNCSRCLSLFYRELKSVRCDLRTD 480  
 DPP20\_O1L.pro GI MVTDTI NTVLSKI LHHHRNVFKYLT SVENKEI AVCNCSRCLSLFYRELKSVRCDLRTD 480  
 DPP21\_O1L.pro GI MVTDTI NTVLSKI LHHHRNVFKYLT SVENKEI AVCNCSRCLSLFYRELKSVRCDLRTD 480  
 CL3\_O1L.pro GI MVTDTI NTVLSKI LHHHRNVFKYLT SVENKEI AVCNCSRCLSLFYRELKSVRCDLRTD 480  
 VACV-3737\_O1L.pro GI MVTDTI NTVLSKI LHHHRNVFKYLT SVENKEI AVCNCSRCLSLFYRELKSVRCDLRTD 480  
 VACV-DUKE\_O1L.pro GI MVTDTI NTVLSKI LHHHRNVFKYLT SVENKEI AVCNCSRCLSLFYRELKSVRCDLRTD 480

+ Majority

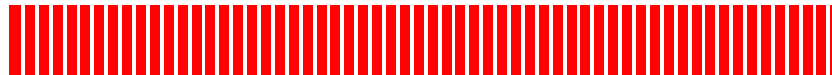

Majority

DGLLDRLYDLTRYALHGKI NQNLI GQRCWGPLEMFLNENK KKKLNNLMEYI KI SDMLVY  
 490 500 510 520 530 540

ACAM2000\_O1L.pro DGLLDRLYDLTRYALHGKI NQNLI GQRCWGPLEMFLNENK KKKLNNLMEYI KI SDMLVY 540  
 DPP9\_O1L.pro DGLLDRLYDLTRYALHGKI NQNLI GQRCWGPLEMFLNENK KKKLNNLMEYI KI SDMLVY 540  
 DPP10\_O1L.pro DGLLDRLYDLTRYALHGKI NQNLI GQRCWGPLEMFLNENK KKKLNNLMEYI KI SDMLVY 540  
 DPP11\_O1L.pro DGLLDRLYDLTRYALHGKI NQNLI GQRCWGPLEMFLNENK KKKLNNLMEYI KI SDMLVY 540  
 DPP12\_O1L.pro DGLLDRLYDLTRYALHGKI NQNLI GQRCWGPLEMFLNENK KKKLNNLMEYI KI SDMLVY 540  
 DPP13\_O1L.pro DGLLDRLYDLTRYALHGKI NQNLI GQRCWGPLEMFLNENK KKKLNNLMEYI KI SDMLVY 540  
 DPP15\_O1L.pro DGLLDRLYDLTRYALHGKI NQNLI GQRCWGPLEMFLNENK KKKLNNLMEYI KI SDMLVY 540  
 DPP16\_O1L.pro DGLLDRLYDLTRYALHGKI NQNLI GQRCWGPLEMFLNENK KKKLNNLMEYI KI SDMLVY 540  
 DPP17\_O1L.pro DGLLDRLYDLTRYALHGKI NQNLI GQRCWGPLEMFLNENK KKKLNNLMEYI KI SDMLVY 540  
 DPP19\_O1L.pro DGLLDRLYDLTRYALHGKI NQNLI GQRCWGPLEMFLNENK KKKLNNLMEYI KI SDMLVY 540  
 DPP20\_O1L.pro DGLLDRLYDLTRYALHGKI NQNLI GQRCWGPLEMFLNENK KKKLNNLMEYI KI SDMLVY 540  
 DPP21\_O1L.pro DGLLDRLYDLTRYALHGKI NQNLI GQRCWGPLEMFLNENK KKKLNNLMEYI KI SDMLVY 540  
 CL3\_O1L.pro DGLLDRLYDLTRYALHGKI NQNLI GQRCWGPLEMFLNENK KKKLNNLMEYI KI SDMLVY 540  
 VACV-3737\_O1L.pro DGLLDRLYDLTRYALHGKI NQNLI GQRCWGPLEMFLNENK KKKLNNLMEYI KI SDMLVY 540  
 VACV-DUKE\_O1L.pro DGLLDRLYDLTRYALHGKI NQNLI GQRCWGPLEMFLNENK KKKLNNLMEYI KI SDMLVY 540

+ Majority

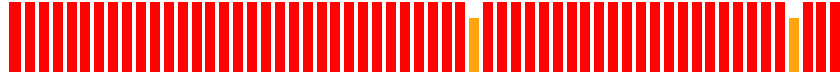

Majority

GHSI EKT LI PI TDSL SFKL SVDT MSVL NDQY AKVI FFNTI I EYI I ATI YYRL TVL DNYT  
 550 560 570 580 590 600

|                   |                                                                               |     |
|-------------------|-------------------------------------------------------------------------------|-----|
| ACAM2000_O1L.pro  | GHSI EKT LI PI TDSL SFKL SVDT MSVL NDQY AKVVI FFNTI I EYI I ATI YYRL TVL DNYT | 600 |
| DPP9_O1L.pro      | GHSI EKT LI PI TDSL SFKL SVDT MSVL NDQY AKVI FFNTI I EYI I ATI YYRL TVL DNYT  | 600 |
| DPP10_O1L.pro     | GHSI EKT LI PI TDSL SFKL SVDT MSVL NDQY AKVI FFNTI I EYI I ATI YYRL TVL DNYT  | 600 |
| DPP11_O1L.pro     | GHSI EKT LI PI TDSL SFKL SVDT MSVL NDQY AKVI FFNTI I EYI I ATI YYRL TVL DNYT  | 600 |
| DPP12_O1L.pro     | GHSI EKT LI PI TDSL SFKL SVDT MSVL NDQY AKVI FFNTI I EYI I ATI YYRL TVL DNYT  | 600 |
| DPP13_O1L.pro     | GHSI EKT LI PI TDSL SFKL SVDT MSVL NDQY AKVI FFNTI I EYI I ATI YYRL TVL DNYT  | 600 |
| DPP15_O1L.pro     | GHSI EKT LI PI TDSL SFKL SVDT MSVL NDQY AKVI FFNTI I EYI I ATI YYRL TVL DNYT  | 600 |
| DPP16_O1L.pro     | GHSI EKT LI PI TDSL SFKL SVDT MSVL NDQY AKVI FFNTI I EYI I ATI YYRL TVL DNYT  | 600 |
| DPP17_O1L.pro     | GHSI EKT LI PI TDSL SFKL SVDT MSVL NDQY AKVI FFNTI I EYI I ATI YYRL TVL DNYT  | 600 |
| DPP19_O1L.pro     | GHSI EKT LI PI TDSL SFKL SVDT MSVL NDQY AKVI FFNTI I EYI I ATI YYRL TVL DNYT  | 600 |
| DPP20_O1L.pro     | GHSI EKT LI PI TDSL SFKL SVDT MSVL NDQY AKVI FFNTI I EYI I ATI YYRL TVL DNYT  | 600 |
| DPP21_O1L.pro     | GHSI EKT LI PI TDSL SFKL SVDT MSVL NDQY AKVI FFNTI I EYI I ATI YYRL TVL DNYT  | 600 |
| CL3_O1L.pro       | GHSI EKT LI PI TDSL SFKL SVDT MSVL NDQY AKVVI FFNTI I EYI I ATI YYRL TVL DNYT | 600 |
| VACV-3737_O1L.pro | GHSI EKT LI PI TDSL SFKL SVDT MSVL NDQY AKVI FFNTI I EYI I ATI YYRL TVL DNYT  | 600 |
| VACV-DUKE_O1L.pro | GHSI EKT LI PI TDSL SFKL SVDT MSVL NDQY AKVVI FFNTI I EYI I ATI YYRL TVL DNYT | 600 |

+ Majority

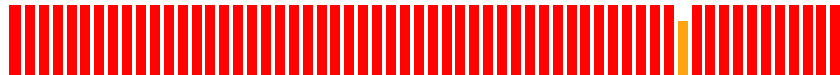

Majority

NVKHFVSKVL HTVMEACGVL FSYI KVNDKI EHELEEMVDKGT VPSYL YHLSI NVI SI I LD  
 610 620 630 640 650 660

|                   |                                                                        |     |
|-------------------|------------------------------------------------------------------------|-----|
| ACAM2000_O1L.pro  | NVKHFVSKVL HTVMEACGVL FSYI KVNDKI EHELEEMVDKGT VPSYL YHLSI NVI SI I LD | 660 |
| DPP9_O1L.pro      | NVKHFVSKVL HTVMEACGVL FSYI KVNDKI EHELEEMVDKGT VPSYL YHLSI NVI SI I LD | 660 |
| DPP10_O1L.pro     | NVKHFVSKVL HTVMEACGVL FSYI KVNDKI EHELEEMVDKGT VPSYL YHLSI NVI SI I LD | 660 |
| DPP11_O1L.pro     | NVKHFVSKVL HTVMEACGVL FSYI KVNDKI EHELEEMVDKGT VPSYL YHLSI NVI SI I LD | 660 |
| DPP12_O1L.pro     | NVKHFVSKVL HTVMEACGVL FSYI KVNDKI EHELEEMVDKGT VPSYL YHLSI NVI SI I LD | 660 |
| DPP13_O1L.pro     | NVKHFVSKVL HTVMEACGVL FSYI KVNDKI EHELEEMVDKGT VPSYL YHLSI NVI SI I LD | 660 |
| DPP15_O1L.pro     | NVKHFVSKVL HTVMEACGVL FSYI KVNDKI EHELEEMVDKGT VPSYL YHLSI NVI SI I LD | 660 |
| DPP16_O1L.pro     | NVKHFVSKVL HTVMEACGVL FSYI KVNDKI EHELEEMVDKGT VPSYL YHLSI NVI SI I LD | 660 |
| DPP17_O1L.pro     | NVKHFVSKVL HTVMEACGVL FSYI KVNDKI EHELEEMVDKGT VPSYL YHLSI NVI SI I LD | 660 |
| DPP19_O1L.pro     | NVKHFVSKVL HTVMEACGVL FSYI KVNDKI EHELEEMVDKGT VPSYL YHLSI NVI SI I LD | 660 |
| DPP20_O1L.pro     | NVKHFVSKVL HTVMEACGVL FSYI KVNDKI EHELEEMVDKGT VPSYL YHLSI NVI SI I LD | 660 |
| DPP21_O1L.pro     | NVKHFVSKVL HTVMEACGVL FSYI KVNDKI EHELEEMVDKGT VPSYL YHLSI NVI SI I LD | 660 |
| CL3_O1L.pro       | NVKHFVSKVL HTVMEACGVL FSYI KVNDKI EHELEEMVDKGT VPSYL YHLSI NVI SI I LD | 660 |
| VACV-3737_O1L.pro | NVKHFVSKVL HTVMEACGVL FSYI KVNDKI EHELEEMVDKGT VPSYL YHLSI NVI SI I LD | 660 |
| VACV-DUKE_O1L.pro | NVKHFVSKVL HTVMEACGVL FSYI KVNDKI EHELEEMVDKGT VPSYL YHLSI NVI SI I LD | 660 |

+ Majority

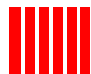

Majority

DI NGTR

|                   |         |     |
|-------------------|---------|-----|
| ACAM2000_O1L.pro  | DI NGTR | 666 |
| DPP9_O1L.pro      | DI NGTR | 666 |
| DPP10_O1L.pro     | DI NGTR | 666 |
| DPP11_O1L.pro     | DI NGTR | 666 |
| DPP12_O1L.pro     | DI NGTR | 666 |
| DPP13_O1L.pro     | DI NGTR | 666 |
| DPP15_O1L.pro     | DI NGTR | 666 |
| DPP16_O1L.pro     | DI NGTR | 666 |
| DPP17_O1L.pro     | DI NGTR | 666 |
| DPP19_O1L.pro     | DI NGTR | 666 |
| DPP20_O1L.pro     | DI NGTR | 666 |
| DPP21_O1L.pro     | DI NGTR | 666 |
| CL3_O1L.pro       | DI NGTR | 666 |
| VACV-3737_O1L.pro | DI NGTR | 666 |
| VACV-DUKE_O1L.pro | DI NGTR | 666 |

**Supplemental Figure 1. Multiple sequence alignment of vaccinia viral proteins recognized by antibody from Dryvax and ACAM2000 vaccinations.** Protein sequences for 21 vaccinia viral antigens were obtained from fifteen Dryvax clones, including ACAM2000 (Viral Bioinformatics Resource Center (1, 2)). Multiple sequence alignments were individually performed for each protein within MegAlign (DNASTAR Lasergene software suite v.8) using the ClustalW alignment program. The name on the left of the alignment signifies the VACV strain and protein analyzed. The alignment reports for each of the 21 vaccinia viral proteins show the consensus strength between each column of aligned residues as well as a majority consensus protein sequence. High conservation is indicated by the height and color with red being 100% agreement. (A) A10L (B) A13L (C) A26L (D) A38L (E) B19R (F) C3L (G) D8L (H) G5R (I) I1L (J) I3L (K) J6R (L) A11R (M) A27L (N) A33R (O) B5R (P) C21-B27R (Q) D13L (R) F13L (S) H3L (T) L4R (U) O1L.

## REFERENCES

1. **Ehlers A, Osborne J, Slack S, Roper RL, Upton C.** 2002. Poxvirus Orthologous Clusters (POCs). *Bioinformatics* **18**:1544-1545.
2. **Upton C, Slack S, Hunter AL, Ehlers A, Roper RL.** 2003. Poxvirus orthologous clusters: toward defining the minimum essential poxvirus genome. *Journal of virology* **77**:7590-7600.
